# Supplementary material for: Natural accelerated proteomic ageing in the red-tailed phascogale mirrors human ageing trajectories
Source: Research Square preprint supplement (doi:10.21203/rs.3.rs-7742962/v1), 2025-10-28
Supplement: Supplementary file 1 [file 1b7e8525d74589dd364293f0.docx]

| **Accession** | **Peptides** | **Unique peptides** | **Confidence score** | **Anova (p)** | **q Value** | **Tag** | **Max fold change** | **Highest Mean** | **Lowest Mean** | **Description** |
| --- | --- | --- | --- | --- | --- | --- | --- | --- | --- | --- |
| **G3WE39** | 1 | 1 | 4.08 | 0.516489552 | 0.284458328 | Max fold change >= 10 | Infinity | AMB | AMNB | Uncharacterized protein OS=Sarcophilus harrisii OX=9305 GN=TSN PE=4 SV=1 |
| **G3VWV8** | 1 | 1 | 4.68 | 0.173094436 | 0.122077688 | Max fold change >= 10 | Infinity | AMB | AMNB | Uncharacterized protein OS=Sarcophilus harrisii OX=9305 PE=4 SV=1 |
| **G3VQ39** | 1 | 1 | 4.02 | 0.177383718 | 0.123867191 | Max fold change >= 10 | 966 | AMB | AMNB | LRRNT domain-containing protein OS=Sarcophilus harrisii OX=9305 GN=KERA PE=4 SV=1 |
| **G3VWB1** | 5 | 2 | 51 | 6.17E-05 | 0.000383295 | Anova p-value <= 0.05; Max fold change >= 10 | 70.1 | AMNB | AMB | Uncharacterized protein OS=Sarcophilus harrisii OX=9305 PE=3 SV=1 |
| **G3VP82** | 2 | 2 | 18 | 0.001649935 | 0.003603252 | Anova p-value <= 0.05; Max fold change >= 10 | 31.3 | AMNB | AMB | Uncharacterized protein OS=Sarcophilus harrisii OX=9305 PE=4 SV=1 |
| **G3WWI8** | 1 | 1 | 6.04 | 0.082904939 | 0.070329358 | Max fold change >= 10 | 26.2 | AMB | AMNB | Chromosome 20 open reading frame 204 OS=Sarcophilus harrisii OX=9305 GN=C20orf204 PE=4 SV=1 |
| **G3WZR7** | 2 | 2 | 20.2 | 4.77E-09 | 6.71E-07 | Anova p-value <= 0.05; Max fold change >= 10 | 20.4 | AMB | AMNB | Uncharacterized protein OS=Sarcophilus harrisii OX=9305 GN=MYL4 PE=4 SV=1 |
| **G3W690** | 1 | 1 | 5.7 | 0.015764655 | 0.019093922 | Anova p-value <= 0.05; Max fold change >= 10 | 16.6 | AMNB | AMB | CTF/NF-I domain-containing protein OS=Sarcophilus harrisii OX=9305 PE=4 SV=1 |
| **G3W0Y1** | 1 | 1 | 6.01 | 6.46E-07 | 1.35E-05 | Anova p-value <= 0.05; Max fold change >= 10 | 11.8 | AMNB | AMB | NCK associated protein 1 OS=Sarcophilus harrisii OX=9305 GN=NCKAP1 PE=4 SV=1 |
| **G3W0L9** | 1 | 1 | 11 | 0.015183639 | 0.018509106 | Anova p-value <= 0.05 | 9.48 | AMB | AMNB | Succinate dehydrogenase [ubiquinone] iron-sulfur subunit_ mitochondrial OS=Sarcophilus harrisii OX=9305 GN=SDHB PE=3 SV=1 |
| **G3VIJ6** | 2 | 1 | 11.5 | 0.001011104 | 0.002508353 | Anova p-value <= 0.05 | 6.97 | AMB | AMNB | Uncharacterized protein OS=Sarcophilus harrisii OX=9305 PE=3 SV=1 |
| **G3WE21** | 2 | 1 | 12.2 | 0.000788747 | 0.002124449 | Anova p-value <= 0.05 | 6.39 | AMB | AMNB | Ig-like domain-containing protein OS=Sarcophilus harrisii OX=9305 PE=4 SV=1 |
| **G3W9Q1** | 1 | 1 | 5.1 | 0.312791587 | 0.192725836 |  | 6.23 | AMB | AMNB | Homeobox domain-containing protein OS=Sarcophilus harrisii OX=9305 PE=4 SV=1 |
| **G3WCH3** | 3 | 2 | 17.2 | 0.016267368 | 0.019535473 | Anova p-value <= 0.05 | 6.17 | AMNB | AMB | Apoptotic protease-activating factor 1 OS=Sarcophilus harrisii OX=9305 GN=APAF1 PE=4 SV=1 |
| **G3W067** | 3 | 1 | 18 | 9.61E-06 | 9.37E-05 | Anova p-value <= 0.05 | 5.53 | AMNB | AMB | 5'-nucleotidase domain containing 4 OS=Sarcophilus harrisii OX=9305 GN=NT5DC4 PE=4 SV=1 |
| **G3WMS4** | 2 | 1 | 12 | 0.126835061 | 0.097078362 |  | 5.24 | AMNB | AMB | Splicing factor SWAP OS=Sarcophilus harrisii OX=9305 GN=SFSWAP PE=4 SV=1 |
| **G3WXM9** | 1 | 1 | 4.93 | 0.804294558 | 0.400817638 |  | 5.23 | AMB | AMNB | Fork-head domain-containing protein OS=Sarcophilus harrisii OX=9305 PE=4 SV=1 |
| **G3W241** | 1 | 1 | 4.77 | 0.681373139 | 0.352608196 |  | 4.75 | AMNB | AMB | Olfactory receptor OS=Sarcophilus harrisii OX=9305 GN=LOC100926333 PE=3 SV=1 |
| **G3VB67** | 3 | 3 | 18.2 | 0.16311076 | 0.116981314 |  | 4.67 | AMNB | AMB | CPSF_A domain-containing protein OS=Sarcophilus harrisii OX=9305 GN=SF3B3 PE=4 SV=1 |
| **G3VQA0** | 1 | 1 | 5.8 | 0.926017354 | 0.439042172 |  | 4.63 | AMB | AMNB | Uncharacterized protein OS=Sarcophilus harrisii OX=9305 GN=CCDC126 PE=4 SV=1 |
| **G3VP08** | 1 | 1 | 3.87 | 1.57E-07 | 4.94E-06 | Anova p-value <= 0.05 | 4.62 | AMNB | AMB | WD_REPEATS_REGION domain-containing protein OS=Sarcophilus harrisii OX=9305 GN=DTL PE=4 SV=1 |
| **G3VDX7** | 7 | 1 | 64.3 | 1.33E-05 | 0.0001204 | Anova p-value <= 0.05 | 4.3 | AMB | AMNB | Keratin 9 OS=Sarcophilus harrisii OX=9305 GN=KRT9 PE=3 SV=1 |
| **G3VKE0** | 1 | 1 | 5.2 | 0.005504447 | 0.008946683 | Anova p-value <= 0.05 | 4.16 | AMB | AMNB | Uncharacterized protein OS=Sarcophilus harrisii OX=9305 PE=4 SV=1 |
| **G3WZT5** | 4 | 2 | 23.2 | 0.001249092 | 0.002955734 | Anova p-value <= 0.05 | 4.14 | AMB | AMNB | Olfactomedin-like domain-containing protein OS=Sarcophilus harrisii OX=9305 GN=OLFM1 PE=4 SV=1 |
| **G3VQI3** | 22 | 2 | 258 | 3.21E-05 | 0.000238545 | Anova p-value <= 0.05 | 4.14 | AMNB | AMB | Tubulin alpha chain OS=Sarcophilus harrisii OX=9305 PE=3 SV=1 |
| **G3VII5** | 9 | 2 | 57.9 | 0.002301769 | 0.00461679 | Anova p-value <= 0.05 | 3.93 | AMB | AMNB | Uncharacterized protein OS=Sarcophilus harrisii OX=9305 PE=4 SV=1 |
| **G3VLK2** | 11 | 5 | 89.1 | 2.42E-07 | 7.21E-06 | Anova p-value <= 0.05 | 3.75 | AMNB | AMB | IF rod domain-containing protein OS=Sarcophilus harrisii OX=9305 GN=KRT15 PE=3 SV=1 |
| **G3WJZ0** | 1 | 1 | 5.28 | 5.79E-07 | 1.31E-05 | Anova p-value <= 0.05 | 3.68 | AMB | AMNB | Uncharacterized protein OS=Sarcophilus harrisii OX=9305 GN=RPL37A PE=3 SV=1 |
| **G3VKW6** | 1 | 1 | 4.25 | 0.19455313 | 0.132423406 |  | 3.62 | AMNB | AMB | Synaptotagmin 9 OS=Sarcophilus harrisii OX=9305 GN=SYT9 PE=4 SV=1 |
| **G3W4P1** | 6 | 5 | 40.2 | 1.40E-05 | 0.000123375 | Anova p-value <= 0.05 | 3.45 | AMB | AMNB | Uncharacterized protein OS=Sarcophilus harrisii OX=9305 GN=PLS3 PE=4 SV=1 |
| **G3W6E9** | 21 | 1 | 163 | 0.000190998 | 0.000847171 | Anova p-value <= 0.05 | 3.31 | AMNB | AMB | FERM domain-containing protein OS=Sarcophilus harrisii OX=9305 GN=EZR PE=4 SV=1 |
| **G3X0A8** | 1 | 1 | 5.51 | 0.039094141 | 0.038999243 | Anova p-value <= 0.05 | 3.22 | AMB | AMNB | Protein tyrosine phosphatase receptor type G OS=Sarcophilus harrisii OX=9305 GN=PTPRG PE=4 SV=1 |
| **G3WSB8** | 4 | 1 | 24.2 | 0.003597728 | 0.006439747 | Anova p-value <= 0.05 | 3.14 | AMB | AMNB | IF rod domain-containing protein OS=Sarcophilus harrisii OX=9305 PE=3 SV=1 |
| **G3W9S4** | 4 | 4 | 29.1 | 0.000341847 | 0.001223776 | Anova p-value <= 0.05 | 3.03 | AMNB | AMB | Uncharacterized protein OS=Sarcophilus harrisii OX=9305 GN=ATF7IP2 PE=4 SV=1 |
| **G3WWQ8** | 1 | 1 | 4.74 | 0.112244059 | 0.088918619 |  | 2.94 | AMB | AMNB | Uncharacterized protein OS=Sarcophilus harrisii OX=9305 GN=DHX40 PE=4 SV=1 |
| **G3VZV1** | 2 | 1 | 10.9 | 1.31E-05 | 0.0001204 | Anova p-value <= 0.05 | 2.93 | AMNB | AMB | IF rod domain-containing protein OS=Sarcophilus harrisii OX=9305 GN=KRT12 PE=3 SV=1 |
| **G3WL00** | 8 | 6 | 54.5 | 4.10E-07 | 1.05E-05 | Anova p-value <= 0.05 | 2.9 | AMB | AMNB | Lamin A/C OS=Sarcophilus harrisii OX=9305 GN=LMNA PE=3 SV=1 |
| **G3WFB5** | 3 | 2 | 22 | 0.001895697 | 0.00401592 | Anova p-value <= 0.05 | 2.85 | AMB | AMNB | ADP ribosylation factor like GTPase 8A OS=Sarcophilus harrisii OX=9305 GN=ARL8A PE=3 SV=1 |
| **G3WZX7** | 5 | 5 | 38.3 | 4.47E-08 | 2.53E-06 | Anova p-value <= 0.05 | 2.85 | AMNB | AMB | Uncharacterized protein OS=Sarcophilus harrisii OX=9305 GN=LANCL1 PE=4 SV=1 |
| **G3VC64** | 34 | 1 | 460 | 0.000945667 | 0.002431325 | Anova p-value <= 0.05 | 2.76 | AMB | AMNB | Actin alpha 2_ smooth muscle OS=Sarcophilus harrisii OX=9305 GN=ACTA2 PE=3 SV=1 |
| **G3WI34** | 6 | 2 | 37.7 | 0.022195894 | 0.025209884 | Anova p-value <= 0.05 | 2.75 | AMB | AMNB | Septin-type G domain-containing protein OS=Sarcophilus harrisii OX=9305 GN=SEPT2 PE=3 SV=1 |
| **G3W1A5** | 3 | 2 | 17.6 | 0.085054344 | 0.071911432 |  | 2.73 | AMNB | AMB | PKD domain-containing protein OS=Sarcophilus harrisii OX=9305 GN=GPNMB PE=4 SV=1 |
| **G3WRJ7** | 2 | 2 | 17 | 0.00021184 | 0.000906193 | Anova p-value <= 0.05 | 2.69 | AMNB | AMB | Uncharacterized protein OS=Sarcophilus harrisii OX=9305 GN=TCAP PE=4 SV=1 |
| **G3VBK5** | 2 | 1 | 11.1 | 8.53E-07 | 1.66E-05 | Anova p-value <= 0.05 | 2.64 | AMNB | AMB | FUN14 domain containing 1 OS=Sarcophilus harrisii OX=9305 GN=FUNDC1 PE=4 SV=1 |
| **G3W748** | 2 | 1 | 18.8 | 0.029056201 | 0.031126656 | Anova p-value <= 0.05 | 2.63 | AMNB | AMB | Transmembrane and tetratricopeptide repeat containing 3 OS=Sarcophilus harrisii OX=9305 GN=TMTC3 PE=4 SV=1 |
| **G3VUC7** | 4 | 3 | 23.1 | 1.25E-05 | 0.000119175 | Anova p-value <= 0.05 | 2.59 | AMB | AMNB | BAR domain-containing protein OS=Sarcophilus harrisii OX=9305 PE=4 SV=1 |
| **G3WKU2** | 1 | 1 | 5.28 | 0.000604499 | 0.00175343 | Anova p-value <= 0.05 | 2.59 | AMNB | AMB | SKICH domain-containing protein OS=Sarcophilus harrisii OX=9305 PE=4 SV=1 |
| **G3WSR1** | 1 | 1 | 4.76 | 1.47E-05 | 0.000128028 | Anova p-value <= 0.05 | 2.58 | AMNB | AMB | Uncharacterized protein OS=Sarcophilus harrisii OX=9305 GN=FXR2 PE=4 SV=1 |
| **G3WXG5** | 3 | 2 | 19.1 | 0.010026303 | 0.013731511 | Anova p-value <= 0.05 | 2.57 | AMNB | AMB | LIM and SH3 protein 1 OS=Sarcophilus harrisii OX=9305 GN=LASP1 PE=4 SV=1 |
| **G3WSR4** | 2 | 1 | 20.4 | 0.000476979 | 0.00151044 | Anova p-value <= 0.05 | 2.56 | AMNB | AMB | Uncharacterized protein OS=Sarcophilus harrisii OX=9305 PE=4 SV=1 |
| **G3WA39** | 1 | 1 | 6.15 | 0.416912732 | 0.238873744 |  | 2.54 | AMB | AMNB | Uncharacterized protein OS=Sarcophilus harrisii OX=9305 PE=4 SV=1 |
| **G3VY49** | 1 | 1 | 7.08 | 0.054635538 | 0.050400883 |  | 2.54 | AMNB | AMB | Cytochrome P450 family 26 subfamily B member 1 OS=Sarcophilus harrisii OX=9305 GN=CYP26B1 PE=3 SV=1 |
| **G3VSS8** | 2 | 1 | 13.6 | 0.00930178 | 0.013087828 | Anova p-value <= 0.05 | 2.53 | AMNB | AMB | Uncharacterized protein OS=Sarcophilus harrisii OX=9305 GN=CDH19 PE=4 SV=1 |
| **G3X2A5** | 1 | 1 | 5.06 | 0.684410273 | 0.353491121 |  | 2.52 | AMB | AMNB | Ovo like zinc finger 2 OS=Sarcophilus harrisii OX=9305 GN=OVOL2 PE=4 SV=1 |
| **G3VF04** | 17 | 10 | 159 | 2.45E-05 | 0.000193522 | Anova p-value <= 0.05 | 2.52 | AMB | AMNB | IF rod domain-containing protein OS=Sarcophilus harrisii OX=9305 PE=3 SV=1 |
| **A0A4D6V0D0** | 3 | 1 | 15.4 | 0.00054409 | 0.001619739 | Anova p-value <= 0.05 | 2.51 | AMNB | AMB | von Willebrand factor (Fragment) OS=Antechinus agilis OX=400481 PE=4 SV=1 |
| **A0A067XZC8** | 2 | 1 | 13.7 | 0.164557468 | 0.11767079 |  | 2.49 | AMNB | AMB | Cytochrome b OS=Sminthopsis butleri OX=90772 PE=3 SV=1 |
| **G3VK77** | 1 | 1 | 5.55 | 0.023917012 | 0.026577657 | Anova p-value <= 0.05 | 2.49 | AMNB | AMB | Olfactory receptor OS=Sarcophilus harrisii OX=9305 GN=LOC100925523 PE=3 SV=1 |
| **G3X226** | 1 | 1 | 5.99 | 0.009375689 | 0.013126513 | Anova p-value <= 0.05 | 2.47 | AMNB | AMB | MRG domain-containing protein OS=Sarcophilus harrisii OX=9305 GN=MORF4L1 PE=4 SV=1 |
| **G3WS51** | 3 | 3 | 21 | 0.001342726 | 0.003138336 | Anova p-value <= 0.05 | 2.42 | AMB | AMNB | Synaptogyrin OS=Sarcophilus harrisii OX=9305 GN=SYNGR3 PE=3 SV=1 |
| **G3VL47** | 2 | 1 | 16.7 | 4.26E-05 | 0.000294153 | Anova p-value <= 0.05 | 2.36 | AMNB | AMB | Lymphoid enhancer binding factor 1 OS=Sarcophilus harrisii OX=9305 GN=LEF1 PE=4 SV=1 |
| **G3VBR0** | 3 | 2 | 17.7 | 0.21268168 | 0.142028084 |  | 2.34 | AMNB | AMB | Uncharacterized protein OS=Sarcophilus harrisii OX=9305 PE=4 SV=1 |
| **G3W285** | 15 | 10 | 151 | 5.23E-06 | 6.30E-05 | Anova p-value <= 0.05 | 2.29 | AMNB | AMB | Sodium/potassium-transporting ATPase subunit alpha OS=Sarcophilus harrisii OX=9305 GN=ATP4A PE=3 SV=1 |
| **P07419** | 13 | 5 | 112 | 2.32E-08 | 1.88E-06 | Anova p-value <= 0.05 | 2.29 | AMNB | AMB | Hemoglobin subunit alpha OS=Dasyurus viverrinus OX=9279 GN=HBA PE=2 SV=2 |
| **G3WID0** | 3 | 2 | 16 | 0.000578329 | 0.001692004 | Anova p-value <= 0.05 | 2.28 | AMB | AMNB | Uncharacterized protein OS=Sarcophilus harrisii OX=9305 PE=4 SV=1 |
| **G3VTA6** | 2 | 1 | 11.4 | 0.005682777 | 0.009079981 | Anova p-value <= 0.05 | 2.28 | AMB | AMNB | Uncharacterized protein OS=Sarcophilus harrisii OX=9305 GN=IL18BP PE=4 SV=1 |
| **G3WKB3** | 2 | 1 | 15.7 | 0.186928429 | 0.128783361 |  | 2.27 | AMB | AMNB | Uncharacterized protein OS=Sarcophilus harrisii OX=9305 GN=NDUFB3 PE=4 SV=1 |
| **G3VGW4** | 3 | 2 | 22.3 | 0.01072227 | 0.014170023 | Anova p-value <= 0.05 | 2.27 | AMNB | AMB | Biliverdin reductase B OS=Sarcophilus harrisii OX=9305 GN=BLVRB PE=4 SV=1 |
| **G3VL54** | 1 | 1 | 4.03 | 0.157030591 | 0.113888065 |  | 2.27 | AMNB | AMB | RELB proto-oncogene_ NF-kB subunit OS=Sarcophilus harrisii OX=9305 GN=RELB PE=4 SV=1 |
| **G3WN74** | 5 | 2 | 49.5 | 0.028509055 | 0.030656645 | Anova p-value <= 0.05 | 2.26 | AMB | AMNB | IF rod domain-containing protein OS=Sarcophilus harrisii OX=9305 PE=3 SV=1 |
| **G3W481** | 9 | 1 | 67.4 | 0.000476858 | 0.00151044 | Anova p-value <= 0.05 | 2.23 | AMB | AMNB | IF rod domain-containing protein OS=Sarcophilus harrisii OX=9305 GN=KRT25 PE=3 SV=1 |
| **Q28932** | 35 | 20 | 261 | 3.07E-08 | 2.17E-06 | Anova p-value <= 0.05 | 2.23 | AMNB | AMB | Hemoglobin subunit beta OS=Sminthopsis crassicaudata OX=9301 GN=HBB PE=2 SV=3 |
| **G3WDP0** | 2 | 2 | 11 | 0.651337058 | 0.339237238 |  | 2.22 | AMB | AMNB | BRCT domain-containing protein OS=Sarcophilus harrisii OX=9305 PE=4 SV=1 |
| **G3WV01** | 2 | 2 | 16.6 | 0.002187041 | 0.004431933 | Anova p-value <= 0.05 | 2.21 | AMNB | AMB | S_100 domain-containing protein OS=Sarcophilus harrisii OX=9305 GN=S100A10 PE=3 SV=1 |
| **G3WM41** | 37 | 1 | 533 | 0.543216715 | 0.294871611 |  | 2.21 | AMNB | AMB | Uncharacterized protein OS=Sarcophilus harrisii OX=9305 GN=ACTA1 PE=3 SV=1 |
| **G3VUH4** | 10 | 8 | 109 | 0.000102054 | 0.000544569 | Anova p-value <= 0.05 | 2.21 | AMB | AMNB | Myoglobin OS=Sarcophilus harrisii OX=9305 GN=MB PE=3 SV=1 |
| **G3VYJ8** | 40 | 12 | 602 | 6.34E-06 | 7.14E-05 | Anova p-value <= 0.05 | 2.19 | AMNB | AMB | Tubulin beta chain OS=Sarcophilus harrisii OX=9305 PE=3 SV=1 |
| **G3WBR9** | 5 | 3 | 30 | 1.10E-07 | 4.16E-06 | Anova p-value <= 0.05 | 2.17 | AMNB | AMB | Septin-type G domain-containing protein OS=Sarcophilus harrisii OX=9305 GN=LOC100921588 PE=3 SV=1 |
| **G3WD44** | 1 | 1 | 5.89 | 0.010271144 | 0.013865399 | Anova p-value <= 0.05 | 2.16 | AMNB | AMB | Carbohydrate sulfotransferase OS=Sarcophilus harrisii OX=9305 GN=CHST13 PE=3 SV=1 |
| **G3WJY9** | 1 | 1 | 4.32 | 0.041094388 | 0.040494699 | Anova p-value <= 0.05 | 2.16 | AMB | AMNB | Cadherin-like domain-containing protein OS=Sarcophilus harrisii OX=9305 GN=CPED1 PE=4 SV=1 |
| **G3VGW5** | 1 | 1 | 5.28 | 0.243758579 | 0.158702337 |  | 2.16 | AMNB | AMB | C-C motif chemokine OS=Sarcophilus harrisii OX=9305 GN=LOC100925102 PE=3 SV=1 |
| **G3VP51** | 4 | 3 | 30.8 | 2.52E-06 | 3.65E-05 | Anova p-value <= 0.05 | 2.15 | AMNB | AMB | Epimerase domain-containing protein OS=Sarcophilus harrisii OX=9305 GN=NDUFA9 PE=4 SV=1 |
| **G3WUV2** | 2 | 2 | 12.3 | 0.001183044 | 0.002847478 | Anova p-value <= 0.05 | 2.14 | AMNB | AMB | Microsomal glutathione S-transferase 3 OS=Sarcophilus harrisii OX=9305 GN=MGST3 PE=4 SV=1 |
| **G3WBX0** | 1 | 1 | 5.24 | 0.007909143 | 0.011601732 | Anova p-value <= 0.05 | 2.11 | AMB | AMNB | Peptidyl-prolyl cis-trans isomerase OS=Sarcophilus harrisii OX=9305 GN=PPIC PE=3 SV=1 |
| **G3W0P2** | 2 | 1 | 10.6 | 1.21E-07 | 4.27E-06 | Anova p-value <= 0.05 | 2.11 | AMNB | AMB | MHD domain-containing protein OS=Sarcophilus harrisii OX=9305 GN=AP1M1 PE=3 SV=1 |
| **G3W2Z5** | 2 | 2 | 9.73 | 6.36E-06 | 7.14E-05 | Anova p-value <= 0.05 | 2.09 | AMB | AMNB | Chimaerin OS=Sarcophilus harrisii OX=9305 GN=CHN1 PE=4 SV=1 |
| **G3VVJ1** | 4 | 2 | 30.3 | 7.05E-07 | 1.42E-05 | Anova p-value <= 0.05 | 2.09 | AMNB | AMB | Uncharacterized protein OS=Sarcophilus harrisii OX=9305 PE=4 SV=1 |
| **G3W464** | 7 | 1 | 43.3 | 0.00884985 | 0.012577096 | Anova p-value <= 0.05 | 2.09 | AMNB | AMB | Actinin alpha 3 (gene/pseudogene) OS=Sarcophilus harrisii OX=9305 GN=ACTN3 PE=4 SV=1 |
| **G3X3M9** | 1 | 1 | 4.14 | 0.907144184 | 0.434464183 |  | 2.08 | AMB | AMNB | Uncharacterized protein OS=Sarcophilus harrisii OX=9305 GN=LIN52 PE=4 SV=1 |
| **G3WW25** | 2 | 1 | 12.8 | 0.000970037 | 0.002462814 | Anova p-value <= 0.05 | 2.08 | AMB | AMNB | Uncharacterized protein OS=Sarcophilus harrisii OX=9305 GN=LOC100919666 PE=4 SV=1 |
| **G3WJK8** | 14 | 11 | 79.7 | 0.000681289 | 0.001898293 | Anova p-value <= 0.05 | 2.08 | AMB | AMNB | Uncharacterized protein OS=Sarcophilus harrisii OX=9305 GN=GAD2 PE=3 SV=1 |
| **G3X2H5** | 5 | 3 | 34 | 0.005761925 | 0.009154723 | Anova p-value <= 0.05 | 2.08 | AMB | AMNB | Contactin 4 OS=Sarcophilus harrisii OX=9305 GN=CNTN4 PE=4 SV=1 |
| **G3WEF1** | 20 | 6 | 250 | 3.23E-09 | 6.09E-07 | Anova p-value <= 0.05 | 2.08 | AMNB | AMB | GLOBIN domain-containing protein OS=Sarcophilus harrisii OX=9305 GN=LOC100932693 PE=3 SV=1 |
| **G3WJY8** | 1 | 1 | 4.07 | 0.085972587 | 0.07247113 |  | 2.08 | AMNB | AMB | Cadherin-like domain-containing protein OS=Sarcophilus harrisii OX=9305 GN=CPED1 PE=4 SV=1 |
| **G3VBC2** | 3 | 2 | 17.4 | 0.000217397 | 0.000912689 | Anova p-value <= 0.05 | 2.07 | AMB | AMNB | Ankyrin repeat and sterile alpha motif domain containing 4B OS=Sarcophilus harrisii OX=9305 GN=ANKS4B PE=4 SV=1 |
| **G3W4H8** | 28 | 24 | 200 | 0.000500969 | 0.001548415 | Anova p-value <= 0.05 | 2.07 | AMB | AMNB | Heat shock protein family A (Hsp70) member 5 OS=Sarcophilus harrisii OX=9305 GN=HSPA5 PE=3 SV=1 |
| **G3WHI9** | 1 | 1 | 13.9 | 0.025974677 | 0.028565991 | Anova p-value <= 0.05 | 2.06 | AMB | AMNB | ADP ribosylation factor like GTPase 16 OS=Sarcophilus harrisii OX=9305 GN=ARL16 PE=4 SV=1 |
| **G3VXT1** | 6 | 1 | 43.9 | 0.00014087 | 0.000692866 | Anova p-value <= 0.05 | 2.06 | AMB | AMNB | Keratin 17 OS=Sarcophilus harrisii OX=9305 GN=KRT17 PE=3 SV=1 |
| **G3W8D8** | 5 | 3 | 30.8 | 0.202784406 | 0.136873097 |  | 2.05 | AMB | AMNB | Uncharacterized protein OS=Sarcophilus harrisii OX=9305 GN=LOC100925648 PE=4 SV=1 |
| **G3WNL2** | 24 | 18 | 196 | 3.84E-07 | 1.04E-05 | Anova p-value <= 0.05 | 2.05 | AMNB | AMB | Uncharacterized protein OS=Sarcophilus harrisii OX=9305 GN=TNR PE=4 SV=1 |
| **G3VEA9** | 19 | 16 | 142 | 5.76E-08 | 2.81E-06 | Anova p-value <= 0.05 | 2.04 | AMNB | AMB | Uncharacterized protein OS=Sarcophilus harrisii OX=9305 GN=LOC100919055 PE=3 SV=1 |
| **G3WH99** | 3 | 1 | 16.6 | 3.88E-05 | 0.000276484 | Anova p-value <= 0.05 | 2.03 | AMNB | AMB | Multifunctional fusion protein OS=Sarcophilus harrisii OX=9305 GN=KATNAL1 PE=3 SV=1 |
| **G3WUF7** | 1 | 1 | 6.32 | 6.08E-07 | 1.32E-05 | Anova p-value <= 0.05 | 2.02 | AMNB | AMB | Uncharacterized protein OS=Sarcophilus harrisii OX=9305 PE=4 SV=1 |
| **G3VQQ1** | 31 | 1 | 418 | 0.652594008 | 0.339267097 |  | 2.02 | AMNB | AMB | Uncharacterized protein OS=Sarcophilus harrisii OX=9305 PE=3 SV=1 |
| **G3WEP4** | 1 | 1 | 5.35 | 0.002836466 | 0.005248051 | Anova p-value <= 0.05 | 2 | AMNB | AMB | Uncharacterized protein OS=Sarcophilus harrisii OX=9305 GN=LOC105749930 PE=3 SV=1 |
| **G3VIT9** | 25 | 21 | 226 | 8.44E-05 | 0.000487395 | Anova p-value <= 0.05 | 2 | AMNB | AMB | Adaptor related protein complex 2 subunit mu 1 OS=Sarcophilus harrisii OX=9305 GN=AP2M1 PE=3 SV=1 |
| **Q28931** | 13 | 4 | 154 | 7.11E-09 | 6.71E-07 | Anova p-value <= 0.05 | 2 | AMNB | AMB | Hemoglobin subunit epsilon OS=Sminthopsis crassicaudata OX=9301 GN=HBE1 PE=2 SV=3 |
| **G3VJC1** | 12 | 1 | 176 | 7.11E-09 | 6.71E-07 | Anova p-value <= 0.05 | 2 | AMNB | AMB | GLOBIN domain-containing protein OS=Sarcophilus harrisii OX=9305 GN=HBE1 PE=3 SV=1 |
| **G3WDF4** | 2 | 2 | 10.5 | 3.98E-08 | 2.50E-06 | Anova p-value <= 0.05 | 2 | AMNB | AMB | Uncharacterized protein OS=Sarcophilus harrisii OX=9305 GN=FBXW12 PE=4 SV=1 |
| **G3WHW3** | 1 | 1 | 5.54 | 0.041050136 | 0.040494699 | Anova p-value <= 0.05 | 1.99 | AMNB | AMB | Phosphomannomutase OS=Sarcophilus harrisii OX=9305 GN=PMM2 PE=3 SV=1 |
| **G3WG72** | 2 | 2 | 11.8 | 0.080960259 | 0.069496013 |  | 1.99 | AMNB | AMB | Uncharacterized protein OS=Sarcophilus harrisii OX=9305 GN=FAM136A PE=4 SV=1 |
| **G3VS86** | 2 | 1 | 12 | 0.017498553 | 0.020825169 | Anova p-value <= 0.05 | 1.99 | AMB | AMNB | Sulfotransferase OS=Sarcophilus harrisii OX=9305 PE=3 SV=1 |
| **G3W7Y9** | 3 | 3 | 26.9 | 4.63E-07 | 1.14E-05 | Anova p-value <= 0.05 | 1.98 | AMB | AMNB | Heme binding protein 1 OS=Sarcophilus harrisii OX=9305 GN=HEBP1 PE=4 SV=1 |
| **G3W0G7** | 3 | 2 | 17.3 | 0.036198345 | 0.036627263 | Anova p-value <= 0.05 | 1.96 | AMNB | AMB | Uncharacterized protein OS=Sarcophilus harrisii OX=9305 GN=RAB5B PE=4 SV=1 |
| **G3WHK1** | 3 | 3 | 25.3 | 0.007702226 | 0.01141151 | Anova p-value <= 0.05 | 1.94 | AMB | AMNB | FABP domain-containing protein OS=Sarcophilus harrisii OX=9305 GN=PMP2 PE=3 SV=1 |
| **G3VQD8** | 3 | 2 | 20.6 | 0.002185258 | 0.004431933 | Anova p-value <= 0.05 | 1.94 | AMB | AMNB | Uncharacterized protein OS=Sarcophilus harrisii OX=9305 GN=POPDC2 PE=4 SV=1 |
| **G3VU16** | 14 | 9 | 92.8 | 0.001174207 | 0.002845715 | Anova p-value <= 0.05 | 1.92 | AMNB | AMB | Uncharacterized protein OS=Sarcophilus harrisii OX=9305 PE=4 SV=1 |
| **G3VG26** | 1 | 1 | 6.08 | 2.32E-05 | 0.000187558 | Anova p-value <= 0.05 | 1.92 | AMNB | AMB | Uncharacterized protein OS=Sarcophilus harrisii OX=9305 GN=FIBP PE=4 SV=1 |
| **G3WX43** | 3 | 1 | 18.1 | 0.002754278 | 0.005124622 | Anova p-value <= 0.05 | 1.92 | AMNB | AMB | Uncharacterized protein OS=Sarcophilus harrisii OX=9305 PE=4 SV=1 |
| **G3X0A9** | 1 | 1 | 6.72 | 0.044490692 | 0.043090731 | Anova p-value <= 0.05 | 1.92 | AMNB | AMB | Protein tyrosine phosphatase receptor type G OS=Sarcophilus harrisii OX=9305 GN=PTPRG PE=3 SV=1 |
| **G3VXT3** | 32 | 7 | 434 | 5.97E-08 | 2.81E-06 | Anova p-value <= 0.05 | 1.9 | AMNB | AMB | Tubulin beta chain OS=Sarcophilus harrisii OX=9305 GN=TUBB6 PE=3 SV=1 |
| **G3WHG0** | 1 | 1 | 11.9 | 0.023130932 | 0.025907727 | Anova p-value <= 0.05 | 1.89 | AMNB | AMB | Homeobox protein OS=Sarcophilus harrisii OX=9305 GN=HOXB9 PE=3 SV=1 |
| **G3X329** | 42 | 6 | 367 | 9.49E-06 | 9.37E-05 | Anova p-value <= 0.05 | 1.88 | AMNB | AMB | Dynamin 1 OS=Sarcophilus harrisii OX=9305 GN=DNM1 PE=3 SV=1 |
| **G3X328** | 36 | 1 | 357 | 9.49E-06 | 9.37E-05 | Anova p-value <= 0.05 | 1.88 | AMNB | AMB | Dynamin 1 OS=Sarcophilus harrisii OX=9305 GN=DNM1 PE=3 SV=1 |
| **G3W5P9** | 1 | 1 | 4.59 | 2.76E-05 | 0.000211269 | Anova p-value <= 0.05 | 1.87 | AMB | AMNB | OTU domain-containing protein OS=Sarcophilus harrisii OX=9305 GN=OTUD4 PE=4 SV=1 |
| **G3VRG2** | 14 | 11 | 120 | 7.15E-10 | 2.02E-07 | Anova p-value <= 0.05 | 1.87 | AMNB | AMB | Visinin like 1 OS=Sarcophilus harrisii OX=9305 GN=VSNL1 PE=4 SV=1 |
| **G3WWM8** | 1 | 1 | 6.47 | 0.627097589 | 0.329647978 |  | 1.87 | AMNB | AMB | Uncharacterized protein OS=Sarcophilus harrisii OX=9305 GN=SDHC PE=4 SV=1 |
| **G3WVF7** | 4 | 1 | 25 | 0.632003868 | 0.331303365 |  | 1.87 | AMNB | AMB | Uncharacterized protein OS=Sarcophilus harrisii OX=9305 GN=RAB26 PE=4 SV=1 |
| **G3W5M2** | 2 | 2 | 18.3 | 0.317235994 | 0.194405394 |  | 1.86 | AMNB | AMB | Protein kinase domain-containing protein OS=Sarcophilus harrisii OX=9305 PE=3 SV=1 |
| **G3WR67** | 3 | 2 | 18.3 | 0.008846044 | 0.012577096 | Anova p-value <= 0.05 | 1.86 | AMB | AMNB | S5 DRBM domain-containing protein OS=Sarcophilus harrisii OX=9305 GN=RPS2 PE=3 SV=1 |
| **G3X0I5** | 3 | 2 | 14.8 | 0.171485789 | 0.121094153 |  | 1.85 | AMB | AMNB | BTB domain containing 1 OS=Sarcophilus harrisii OX=9305 GN=BTBD1 PE=4 SV=1 |
| **G3W8M0** | 6 | 5 | 48.5 | 0.000149269 | 0.000727848 | Anova p-value <= 0.05 | 1.84 | AMB | AMNB | Uncharacterized protein OS=Sarcophilus harrisii OX=9305 PE=4 SV=1 |
| **G3W982** | 8 | 2 | 51.1 | 1.10E-06 | 1.96E-05 | Anova p-value <= 0.05 | 1.84 | AMB | AMNB | Serine/threonine-protein phosphatase 2A 55 kDa regulatory subunit B OS=Sarcophilus harrisii OX=9305 GN=PPP2R2A PE=3 SV=1 |
| **G3VUN3** | 1 | 1 | 6.13 | 0.837491591 | 0.411646474 |  | 1.83 | AMB | AMNB | Uncharacterized protein OS=Sarcophilus harrisii OX=9305 GN=METTL23 PE=4 SV=1 |
| **G3VX55** | 2 | 2 | 12 | 0.033320648 | 0.034439851 | Anova p-value <= 0.05 | 1.83 | AMB | AMNB | Thioredoxin OS=Sarcophilus harrisii OX=9305 GN=TXN PE=3 SV=1 |
| **G3VKB3** | 10 | 3 | 65.3 | 0.007662024 | 0.01141151 | Anova p-value <= 0.05 | 1.83 | AMB | AMNB | IF rod domain-containing protein OS=Sarcophilus harrisii OX=9305 GN=KRT19 PE=3 SV=1 |
| **G3W6Q8** | 3 | 2 | 17 | 0.000257279 | 0.001024811 | Anova p-value <= 0.05 | 1.83 | AMB | AMNB | Cation channel sperm associated 4 OS=Sarcophilus harrisii OX=9305 GN=CATSPER4 PE=4 SV=1 |
| **G3W2T7** | 14 | 6 | 114 | 0.00998449 | 0.013731511 | Anova p-value <= 0.05 | 1.82 | AMNB | AMB | IF rod domain-containing protein OS=Sarcophilus harrisii OX=9305 PE=3 SV=1 |
| **G3W3S2** | 10 | 9 | 78.2 | 1.34E-05 | 0.0001204 | Anova p-value <= 0.05 | 1.82 | AMB | AMNB | Carbonyl reductase 1 OS=Sarcophilus harrisii OX=9305 GN=CBR1 PE=3 SV=1 |
| **G3WQL8** | 3 | 3 | 10.5 | 0.039344297 | 0.039042219 | Anova p-value <= 0.05 | 1.82 | AMNB | AMB | BORA aurora kinase A activator OS=Sarcophilus harrisii OX=9305 GN=BORA PE=4 SV=1 |
| **G3W3L6** | 3 | 1 | 31.4 | 0.0143423 | 0.0177513 | Anova p-value <= 0.05 | 1.82 | AMB | AMNB | UBA domain-containing protein OS=Sarcophilus harrisii OX=9305 PE=4 SV=1 |
| **G3WWP9** | 4 | 3 | 23.3 | 1.03E-06 | 1.94E-05 | Anova p-value <= 0.05 | 1.82 | AMNB | AMB | Zf_RING domain-containing protein OS=Sarcophilus harrisii OX=9305 GN=PHF24 PE=4 SV=1 |
| **G3WS64** | 5 | 2 | 27.8 | 4.83E-05 | 0.000317693 | Anova p-value <= 0.05 | 1.81 | AMB | AMNB | Uncharacterized protein OS=Sarcophilus harrisii OX=9305 GN=TEKT3 PE=4 SV=1 |
| **G3VAM9** | 2 | 1 | 17.2 | 0.014313252 | 0.0177513 | Anova p-value <= 0.05 | 1.81 | AMB | AMNB | Uncharacterized protein OS=Sarcophilus harrisii OX=9305 PE=4 SV=1 |
| **G3WJF6** | 4 | 2 | 36.5 | 0.005335187 | 0.008778299 | Anova p-value <= 0.05 | 1.81 | AMB | AMNB | Uncharacterized protein OS=Sarcophilus harrisii OX=9305 GN=RAB15 PE=4 SV=1 |
| **G3WJ79** | 5 | 3 | 46.3 | 0.00088793 | 0.002328373 | Anova p-value <= 0.05 | 1.8 | AMB | AMNB | Receptor expression-enhancing protein OS=Sarcophilus harrisii OX=9305 GN=REEP5 PE=3 SV=1 |
| **G3VRJ5** | 1 | 1 | 14.1 | 4.39E-05 | 0.000295286 | Anova p-value <= 0.05 | 1.8 | AMB | AMNB | MFS domain-containing protein OS=Sarcophilus harrisii OX=9305 PE=4 SV=1 |
| **G3VEV3** | 2 | 1 | 13.7 | 0.177031572 | 0.123812831 |  | 1.8 | AMNB | AMB | Nucleoporin 88 OS=Sarcophilus harrisii OX=9305 GN=NUP88 PE=4 SV=1 |
| **A0A075QRB4** | 1 | 1 | 7.63 | 0.046671154 | 0.044629615 | Anova p-value <= 0.05 | 1.8 | AMNB | AMB | NADH-ubiquinone oxidoreductase chain 3 OS=Antechinus swainsonii OX=9284 GN=ND3 PE=3 SV=1 |
| **G3WPN7** | 1 | 1 | 5.98 | 0.010607393 | 0.014111546 | Anova p-value <= 0.05 | 1.8 | AMNB | AMB | PPM-type phosphatase domain-containing protein OS=Sarcophilus harrisii OX=9305 PE=4 SV=1 |
| **G3VGS8** | 10 | 8 | 68.7 | 9.08E-05 | 0.00050944 | Anova p-value <= 0.05 | 1.8 | AMNB | AMB | Uncharacterized protein OS=Sarcophilus harrisii OX=9305 GN=CD2AP PE=4 SV=1 |
| **G3VTY3** | 19 | 14 | 170 | 3.26E-10 | 1.85E-07 | Anova p-value <= 0.05 | 1.79 | AMNB | AMB | Uncharacterized protein OS=Sarcophilus harrisii OX=9305 GN=GSTM3 PE=4 SV=1 |
| **G3VRF0** | 7 | 7 | 65.2 | 2.59E-05 | 0.000200877 | Anova p-value <= 0.05 | 1.79 | AMB | AMNB | Cytochrome b-c1 complex subunit 7 OS=Sarcophilus harrisii OX=9305 GN=MTERF3 PE=3 SV=1 |
| **G3WMY0** | 1 | 1 | 11.1 | 8.56E-06 | 8.80E-05 | Anova p-value <= 0.05 | 1.78 | AMB | AMNB | Uncharacterized protein OS=Sarcophilus harrisii OX=9305 GN=TMEM100 PE=4 SV=1 |
| **G3W9N5** | 4 | 2 | 17.9 | 1.26E-05 | 0.000119175 | Anova p-value <= 0.05 | 1.78 | AMNB | AMB | JmjC domain-containing protein OS=Sarcophilus harrisii OX=9305 PE=4 SV=1 |
| **G3WM04** | 1 | 1 | 5.54 | 0.238594853 | 0.156560198 |  | 1.78 | AMNB | AMB | Uncharacterized protein OS=Sarcophilus harrisii OX=9305 GN=SPACA1 PE=4 SV=1 |
| **G3VGH6** | 6 | 1 | 56.6 | 0.000889158 | 0.002328373 | Anova p-value <= 0.05 | 1.78 | AMB | AMNB | IF rod domain-containing protein OS=Sarcophilus harrisii OX=9305 PE=3 SV=1 |
| **G3VH66** | 40 | 3 | 564 | 0.002671321 | 0.005019809 | Anova p-value <= 0.05 | 1.78 | AMNB | AMB | Tubulin alpha chain OS=Sarcophilus harrisii OX=9305 PE=3 SV=1 |
| **G3WTD2** | 15 | 10 | 97.8 | 9.93E-08 | 4.01E-06 | Anova p-value <= 0.05 | 1.77 | AMNB | AMB | Uncharacterized protein OS=Sarcophilus harrisii OX=9305 GN=SYNCRIP PE=4 SV=1 |
| **G3WG29** | 4 | 3 | 26.1 | 0.000284486 | 0.001096804 | Anova p-value <= 0.05 | 1.76 | AMB | AMNB | FABP domain-containing protein OS=Sarcophilus harrisii OX=9305 GN=FABP4 PE=3 SV=1 |
| **G3W8X5** | 2 | 1 | 11 | 0.002030835 | 0.004194887 | Anova p-value <= 0.05 | 1.76 | AMB | AMNB | RRM domain-containing protein OS=Sarcophilus harrisii OX=9305 GN=NONO PE=4 SV=1 |
| **G3WHU9** | 2 | 1 | 17.9 | 0.871001973 | 0.422883529 |  | 1.75 | AMB | AMNB | Uncharacterized protein OS=Sarcophilus harrisii OX=9305 PE=4 SV=1 |
| **G3WEL0** | 1 | 1 | 5.25 | 0.161948954 | 0.116394101 |  | 1.75 | AMB | AMNB | Uncharacterized protein OS=Sarcophilus harrisii OX=9305 PE=4 SV=1 |
| **Q5QS89** | 5 | 2 | 41.2 | 8.01E-06 | 8.39E-05 | Anova p-value <= 0.05 | 1.75 | AMNB | AMB | Cytochrome c oxidase subunit 2 OS=Sminthopsis douglasi OX=90758 GN=CO2 PE=3 SV=2 |
| **G3W5Z0** | 8 | 6 | 49.1 | 0.000219449 | 0.000912689 | Anova p-value <= 0.05 | 1.74 | AMNB | AMB | Pept_C1 domain-containing protein OS=Sarcophilus harrisii OX=9305 GN=CTSB PE=3 SV=1 |
| **G3WRV1** | 1 | 1 | 5.83 | 0.099677379 | 0.081382786 |  | 1.74 | AMNB | AMB | Uncharacterized protein OS=Sarcophilus harrisii OX=9305 GN=PPP1R1B PE=4 SV=1 |
| **G3VXB5** | 1 | 1 | 4.07 | 1.94E-06 | 2.97E-05 | Anova p-value <= 0.05 | 1.74 | AMNB | AMB | IF rod domain-containing protein OS=Sarcophilus harrisii OX=9305 GN=LOC100930272 PE=3 SV=1 |
| **G3W8Q7** | 12 | 10 | 99 | 0.000151841 | 0.000734057 | Anova p-value <= 0.05 | 1.73 | AMNB | AMB | Uncharacterized protein OS=Sarcophilus harrisii OX=9305 GN=GAP43 PE=4 SV=1 |
| **G3WJU5** | 43 | 9 | 627 | 7.41E-08 | 3.22E-06 | Anova p-value <= 0.05 | 1.73 | AMNB | AMB | Tubulin alpha chain OS=Sarcophilus harrisii OX=9305 GN=TUBA4A PE=3 SV=1 |
| **G3W822** | 1 | 1 | 5.06 | 0.004096036 | 0.007106795 | Anova p-value <= 0.05 | 1.73 | AMB | AMNB | Microtubule associated monooxygenase_ calponin and LIM domain containing 3 OS=Sarcophilus harrisii OX=9305 GN=MICAL3 PE=4 SV=1 |
| **G3WUX2** | 2 | 1 | 12 | 0.739274121 | 0.375697146 |  | 1.73 | AMB | AMNB | Uncharacterized protein OS=Sarcophilus harrisii OX=9305 PE=4 SV=1 |
| **G3VUL3** | 6 | 6 | 47.6 | 0.000102041 | 0.000544569 | Anova p-value <= 0.05 | 1.72 | AMB | AMNB | Cytochrome c1 OS=Sarcophilus harrisii OX=9305 GN=CYC1 PE=4 SV=1 |
| **G3W3D6** | 45 | 35 | 523 | 1.50E-05 | 0.000128303 | Anova p-value <= 0.05 | 1.72 | AMB | AMNB | Glial fibrillary acidic protein OS=Sarcophilus harrisii OX=9305 GN=GFAP PE=3 SV=1 |
| **G3VGV2** | 21 | 17 | 183 | 0.00157095 | 0.003512121 | Anova p-value <= 0.05 | 1.72 | AMB | AMNB | Uncharacterized protein OS=Sarcophilus harrisii OX=9305 PE=3 SV=1 |
| **G3WM25** | 2 | 2 | 18.1 | 0.000320201 | 0.001183746 | Anova p-value <= 0.05 | 1.71 | AMNB | AMB | Uncharacterized protein OS=Sarcophilus harrisii OX=9305 PE=4 SV=1 |
| **G3X273** | 12 | 12 | 73.4 | 3.91E-05 | 0.000276484 | Anova p-value <= 0.05 | 1.71 | AMNB | AMB | Uncharacterized protein OS=Sarcophilus harrisii OX=9305 PE=4 SV=1 |
| **G3X3S2** | 1 | 1 | 6.68 | 0.000896523 | 0.002336842 | Anova p-value <= 0.05 | 1.71 | AMB | AMNB | Ubiquitin-like domain-containing protein OS=Sarcophilus harrisii OX=9305 PE=4 SV=1 |
| **G3VST0** | 8 | 3 | 77.7 | 2.07E-05 | 0.000172435 | Anova p-value <= 0.05 | 1.7 | AMB | AMNB | Pyruvate dehydrogenase E1 component subunit alpha OS=Sarcophilus harrisii OX=9305 PE=4 SV=1 |
| **G3WIG5** | 1 | 1 | 6.87 | 1.11E-06 | 1.96E-05 | Anova p-value <= 0.05 | 1.7 | AMB | AMNB | ATP synthase F1 subunit epsilon OS=Sarcophilus harrisii OX=9305 GN=ATP5F1E PE=4 SV=1 |
| **G3W2X0** | 6 | 3 | 35 | 0.000460084 | 0.001500098 | Anova p-value <= 0.05 | 1.7 | AMB | AMNB | Uncharacterized protein OS=Sarcophilus harrisii OX=9305 GN=CTNNB1 PE=4 SV=1 |
| **G3VDI6** | 2 | 1 | 15.5 | 0.006811614 | 0.01044122 | Anova p-value <= 0.05 | 1.7 | AMB | AMNB | BACK domain-containing protein OS=Sarcophilus harrisii OX=9305 GN=KLHL3 PE=4 SV=1 |
| **G3W8L8** | 3 | 3 | 17.2 | 0.008295674 | 0.012031357 | Anova p-value <= 0.05 | 1.7 | AMNB | AMB | 5-aminoimidazole-4-carboxamide ribonucleotide formyltransferase/IMP cyclohydrolase OS=Sarcophilus harrisii OX=9305 GN=ATIC PE=4 SV=1 |
| **G3VB06** | 11 | 8 | 93.6 | 0.000234215 | 0.000951273 | Anova p-value <= 0.05 | 1.69 | AMB | AMNB | TPR_REGION domain-containing protein OS=Sarcophilus harrisii OX=9305 PE=4 SV=1 |
| **G3VIM7** | 5 | 4 | 41.6 | 0.010095436 | 0.013765668 | Anova p-value <= 0.05 | 1.69 | AMNB | AMB | Uncharacterized protein OS=Sarcophilus harrisii OX=9305 GN=LOC100923731 PE=4 SV=1 |
| **G3VKY5** | 2 | 1 | 11.4 | 0.106101394 | 0.085125471 |  | 1.69 | AMNB | AMB | GCFC domain-containing protein OS=Sarcophilus harrisii OX=9305 PE=4 SV=1 |
| **G3WZR3** | 3 | 1 | 17.8 | 0.014664959 | 0.018082954 | Anova p-value <= 0.05 | 1.69 | AMB | AMNB | Cyclin and CBS domain divalent metal cation transport mediator 4 OS=Sarcophilus harrisii OX=9305 GN=CNNM4 PE=4 SV=1 |
| **G3WZR8** | 4 | 1 | 23 | 0.000725911 | 0.001993166 | Anova p-value <= 0.05 | 1.69 | AMB | AMNB | Uncharacterized protein OS=Sarcophilus harrisii OX=9305 GN=EZH2 PE=4 SV=1 |
| **G3W4X2** | 2 | 2 | 12.7 | 0.00247376 | 0.004870003 | Anova p-value <= 0.05 | 1.68 | AMB | AMNB | Uncharacterized protein OS=Sarcophilus harrisii OX=9305 GN=NDUFA5 PE=4 SV=1 |
| **G3WGD1** | 2 | 2 | 11.9 | 0.288093949 | 0.181461859 |  | 1.67 | AMB | AMNB | DnaJ heat shock protein family (Hsp40) member A1 OS=Sarcophilus harrisii OX=9305 GN=DNAJA1 PE=3 SV=1 |
| **G3VHY8** | 9 | 4 | 51.4 | 0.000678734 | 0.001898293 | Anova p-value <= 0.05 | 1.67 | AMNB | AMB | ATP-dependent 6-phosphofructokinase OS=Sarcophilus harrisii OX=9305 GN=PFKM PE=3 SV=1 |
| **G3VXV9** | 3 | 2 | 34.7 | 0.028328146 | 0.030520131 | Anova p-value <= 0.05 | 1.66 | AMB | AMNB | Uncharacterized protein OS=Sarcophilus harrisii OX=9305 GN=LOC111718869 PE=4 SV=1 |
| **G3VRU5** | 10 | 9 | 110 | 0.000306724 | 0.001155883 | Anova p-value <= 0.05 | 1.66 | AMB | AMNB | H15 domain-containing protein OS=Sarcophilus harrisii OX=9305 GN=LOC100928641 PE=3 SV=1 |
| **G3VXB4** | 3 | 2 | 17.2 | 0.039313594 | 0.039042219 | Anova p-value <= 0.05 | 1.66 | AMB | AMNB | RAB5A_ member RAS oncogene family OS=Sarcophilus harrisii OX=9305 GN=RAB5A PE=4 SV=1 |
| **G3WK63** | 5 | 1 | 33.2 | 0.223088539 | 0.147929839 |  | 1.64 | AMB | AMNB | UBIQUITIN_CONJUGAT_2 domain-containing protein OS=Sarcophilus harrisii OX=9305 GN=UBE2V2 PE=4 SV=1 |
| **G3WZK5** | 3 | 3 | 17.4 | 0.000126369 | 0.000643941 | Anova p-value <= 0.05 | 1.64 | AMNB | AMB | C-type lectin domain-containing protein OS=Sarcophilus harrisii OX=9305 GN=CLEC3A PE=4 SV=1 |
| **G3WCE1** | 2 | 1 | 12.2 | 0.03889554 | 0.038869677 | Anova p-value <= 0.05 | 1.64 | AMNB | AMB | Ribosomal protein S3 OS=Sarcophilus harrisii OX=9305 GN=RPS3 PE=3 SV=1 |
| **G3X3M6** | 4 | 1 | 31.2 | 0.874748304 | 0.424338186 |  | 1.63 | AMNB | AMB | Uncharacterized protein OS=Sarcophilus harrisii OX=9305 GN=RAB37 PE=4 SV=1 |
| **G3X2J2** | 4 | 3 | 34.9 | 0.001139834 | 0.002790982 | Anova p-value <= 0.05 | 1.62 | AMNB | AMB | Amino acid transporter OS=Sarcophilus harrisii OX=9305 GN=SLC1A3 PE=3 SV=1 |
| **G3VT08** | 6 | 1 | 58 | 0.007211478 | 0.010855226 | Anova p-value <= 0.05 | 1.62 | AMB | AMNB | Cytochrome c oxidase subunit 4I1 OS=Sarcophilus harrisii OX=9305 GN=COX4I1 PE=4 SV=1 |
| **A0A1C9HJB3** | 6 | 3 | 50 | 0.008428612 | 0.012192895 | Anova p-value <= 0.05 | 1.62 | AMNB | AMB | Beta-actin (Fragment) OS=Phascogale calura OX=38776 PE=2 SV=1 |
| **G3WJ77** | 6 | 3 | 53.6 | 0.091668978 | 0.076358197 |  | 1.62 | AMNB | AMB | IF rod domain-containing protein OS=Sarcophilus harrisii OX=9305 GN=KRT80 PE=3 SV=1 |
| **G3WS92** | 7 | 7 | 52.5 | 0.005012167 | 0.008362832 | Anova p-value <= 0.05 | 1.61 | AMNB | AMB | Sodium/potassium-transporting ATPase subunit beta OS=Sarcophilus harrisii OX=9305 GN=ATP1B2 PE=3 SV=1 |
| **G3WMM3** | 64 | 13 | 893 | 2.59E-06 | 3.66E-05 | Anova p-value <= 0.05 | 1.61 | AMNB | AMB | Tubulin beta chain OS=Sarcophilus harrisii OX=9305 GN=TUBB2A PE=3 SV=1 |
| **G3VG18** | 3 | 1 | 32.2 | 0.021627437 | 0.024613662 | Anova p-value <= 0.05 | 1.61 | AMNB | AMB | Uncharacterized protein OS=Sarcophilus harrisii OX=9305 PE=3 SV=1 |
| **G3VY58** | 17 | 6 | 113 | 5.41E-07 | 1.28E-05 | Anova p-value <= 0.05 | 1.61 | AMB | AMNB | Alpha-1_4 glucan phosphorylase OS=Sarcophilus harrisii OX=9305 GN=PYGM PE=3 SV=1 |
| **G3WHJ6** | 7 | 5 | 58.5 | 1.95E-06 | 2.97E-05 | Anova p-value <= 0.05 | 1.61 | AMNB | AMB | NADH:ubiquinone oxidoreductase subunit A6 OS=Sarcophilus harrisii OX=9305 GN=NDUFA6 PE=3 SV=1 |
| **G3W3M2** | 2 | 1 | 11.1 | 0.00067398 | 0.001896612 | Anova p-value <= 0.05 | 1.61 | AMB | AMNB | Uncharacterized protein OS=Sarcophilus harrisii OX=9305 GN=MSI2 PE=4 SV=1 |
| **G3VLE8** | 3 | 2 | 17 | 0.01849028 | 0.021653291 | Anova p-value <= 0.05 | 1.61 | AMNB | AMB | Uncharacterized protein OS=Sarcophilus harrisii OX=9305 GN=LOC100933299 PE=4 SV=1 |
| **G3WET4** | 2 | 1 | 11.3 | 0.008551164 | 0.012254663 | Anova p-value <= 0.05 | 1.61 | AMB | AMNB | Spermatogenesis associated 46 OS=Sarcophilus harrisii OX=9305 GN=SPATA46 PE=4 SV=1 |
| **G3WWN3** | 2 | 2 | 12 | 0.003907959 | 0.006864702 | Anova p-value <= 0.05 | 1.6 | AMNB | AMB | Phosphodiesterase OS=Sarcophilus harrisii OX=9305 GN=PDE4D PE=3 SV=1 |
| **G3WEH6** | 1 | 1 | 6.37 | 0.403769975 | 0.233377821 |  | 1.6 | AMNB | AMB | Uncharacterized protein OS=Sarcophilus harrisii OX=9305 GN=CNOT7 PE=4 SV=1 |
| **G3WXL3** | 20 | 2 | 185 | 0.019688288 | 0.022820003 | Anova p-value <= 0.05 | 1.6 | AMNB | AMB | Uncharacterized protein OS=Sarcophilus harrisii OX=9305 GN=HNRNPK PE=4 SV=1 |
| **G3VLW7** | 6 | 1 | 55.8 | 2.18E-05 | 0.000178709 | Anova p-value <= 0.05 | 1.59 | AMNB | AMB | Uncharacterized protein OS=Sarcophilus harrisii OX=9305 PE=4 SV=1 |
| **G3WE91** | 28 | 23 | 268 | 6.44E-06 | 7.14E-05 | Anova p-value <= 0.05 | 1.59 | AMNB | AMB | GLOBIN domain-containing protein OS=Sarcophilus harrisii OX=9305 PE=3 SV=1 |
| **G3X1E8** | 8 | 3 | 52.9 | 0.002073019 | 0.004233027 | Anova p-value <= 0.05 | 1.58 | AMB | AMNB | Phytanoyl-CoA 2-hydroxylase interacting protein OS=Sarcophilus harrisii OX=9305 GN=PHYHIP PE=4 SV=1 |
| **G3VZM7** | 3 | 3 | 16.5 | 0.000135243 | 0.000676964 | Anova p-value <= 0.05 | 1.57 | AMB | AMNB | Cell division cycle 37 OS=Sarcophilus harrisii OX=9305 GN=CDC37 PE=4 SV=1 |
| **G3W0V5** | 4 | 3 | 36.5 | 0.000180351 | 0.000829357 | Anova p-value <= 0.05 | 1.57 | AMB | AMNB | Clathrin light chain OS=Sarcophilus harrisii OX=9305 PE=3 SV=1 |
| **G3W2T0** | 5 | 4 | 28.9 | 0.013925482 | 0.017542498 | Anova p-value <= 0.05 | 1.57 | AMNB | AMB | Sideroflexin 5 OS=Sarcophilus harrisii OX=9305 GN=SFXN5 PE=4 SV=1 |
| **G3WSY5** | 2 | 1 | 19.4 | 0.050842679 | 0.048090002 |  | 1.57 | AMNB | AMB | F-box protein 9 OS=Sarcophilus harrisii OX=9305 GN=FBXO9 PE=4 SV=1 |
| **G3X0P5** | 2 | 1 | 13.1 | 0.011746714 | 0.015349616 | Anova p-value <= 0.05 | 1.57 | AMB | AMNB | Stathmin OS=Sarcophilus harrisii OX=9305 GN=STMN3 PE=3 SV=1 |
| **G3W1H6** | 2 | 1 | 10.5 | 0.180912063 | 0.125681219 |  | 1.56 | AMNB | AMB | MARVEL domain-containing protein OS=Sarcophilus harrisii OX=9305 GN=SYNPR PE=4 SV=1 |
| **G3W2Z1** | 28 | 22 | 199 | 3.11E-06 | 4.29E-05 | Anova p-value <= 0.05 | 1.56 | AMNB | AMB | Microtubule-associated protein OS=Sarcophilus harrisii OX=9305 GN=MAP2 PE=4 SV=1 |
| **G3WWN5** | 4 | 2 | 34 | 0.00012896 | 0.000651274 | Anova p-value <= 0.05 | 1.56 | AMB | AMNB | Serine/threonine-protein phosphatase 2A 55 kDa regulatory subunit B OS=Sarcophilus harrisii OX=9305 PE=3 SV=1 |
| **G3WHF9** | 8 | 2 | 56.3 | 0.000175078 | 0.000811705 | Anova p-value <= 0.05 | 1.56 | AMB | AMNB | NDRG family member 4 OS=Sarcophilus harrisii OX=9305 GN=NDRG4 PE=4 SV=1 |
| **G3VS57** | 2 | 1 | 11 | 0.000478001 | 0.00151044 | Anova p-value <= 0.05 | 1.56 | AMB | AMNB | Uncharacterized protein OS=Sarcophilus harrisii OX=9305 GN=NWD2 PE=4 SV=1 |
| **G3VXY5** | 2 | 2 | 10 | 0.128669982 | 0.097952603 |  | 1.55 | AMNB | AMB | Ras association domain family member 9 OS=Sarcophilus harrisii OX=9305 GN=RASSF9 PE=4 SV=1 |
| **G3W5P2** | 4 | 3 | 22.8 | 0.003791803 | 0.006744445 | Anova p-value <= 0.05 | 1.55 | AMB | AMNB | Phosphodiesterase OS=Sarcophilus harrisii OX=9305 GN=PDE2A PE=3 SV=1 |
| **G3WDU0** | 17 | 15 | 155 | 7.28E-06 | 7.92E-05 | Anova p-value <= 0.05 | 1.55 | AMB | AMNB | Uncharacterized protein OS=Sarcophilus harrisii OX=9305 GN=UQCRC1 PE=4 SV=1 |
| **G3VNM4** | 3 | 2 | 22.2 | 0.004630584 | 0.00788906 | Anova p-value <= 0.05 | 1.55 | AMB | AMNB | Superoxide dismutase [Cu-Zn] OS=Sarcophilus harrisii OX=9305 GN=SOD1 PE=3 SV=1 |
| **G3VCG1** | 3 | 3 | 16.6 | 0.00485287 | 0.008121 | Anova p-value <= 0.05 | 1.55 | AMNB | AMB | Peptidyl-prolyl cis-trans isomerase OS=Sarcophilus harrisii OX=9305 GN=PPIL6 PE=3 SV=1 |
| **G3VXC8** | 16 | 4 | 98 | 0.00015473 | 0.000741688 | Anova p-value <= 0.05 | 1.54 | AMB | AMNB | IF rod domain-containing protein OS=Sarcophilus harrisii OX=9305 GN=LOC100924488 PE=3 SV=1 |
| **G3VMT2** | 2 | 1 | 12.2 | 0.000871892 | 0.002304499 | Anova p-value <= 0.05 | 1.54 | AMB | AMNB | ATP binding cassette subfamily B member 7 OS=Sarcophilus harrisii OX=9305 GN=ABCB7 PE=4 SV=1 |
| **G3X014** | 2 | 1 | 18.6 | 0.143235115 | 0.106741986 |  | 1.54 | AMNB | AMB | Uncharacterized protein OS=Sarcophilus harrisii OX=9305 PE=4 SV=1 |
| **G3W8J8** | 9 | 4 | 55 | 0.002549219 | 0.004887545 | Anova p-value <= 0.05 | 1.54 | AMNB | AMB | Heterogeneous nuclear ribonucleoprotein R OS=Sarcophilus harrisii OX=9305 GN=HNRNPR PE=4 SV=1 |
| **G3VAI2** | 1 | 1 | 5.7 | 0.0224883 | 0.025484454 | Anova p-value <= 0.05 | 1.53 | AMNB | AMB | Uncharacterized protein OS=Sarcophilus harrisii OX=9305 PE=4 SV=1 |
| **G3VW45** | 2 | 1 | 13.3 | 0.053495012 | 0.049684801 |  | 1.53 | AMB | AMNB | Uncharacterized protein OS=Sarcophilus harrisii OX=9305 PE=4 SV=1 |
| **G3WRS9** | 2 | 1 | 10.6 | 0.003869798 | 0.006818844 | Anova p-value <= 0.05 | 1.53 | AMNB | AMB | Uncharacterized protein OS=Sarcophilus harrisii OX=9305 GN=GASK1B PE=4 SV=1 |
| **G3WF55** | 2 | 2 | 11.1 | 0.000213081 | 0.000906193 | Anova p-value <= 0.05 | 1.53 | AMB | AMNB | Arrestin beta 1 OS=Sarcophilus harrisii OX=9305 GN=ARRB1 PE=4 SV=1 |
| **G3VUS1** | 1 | 1 | 6.09 | 0.239404754 | 0.156727997 |  | 1.52 | AMNB | AMB | DnaJ heat shock protein family (Hsp40) member B4 OS=Sarcophilus harrisii OX=9305 GN=DNAJB4 PE=4 SV=1 |
| **G3VF31** | 16 | 13 | 126 | 4.36E-05 | 0.000295286 | Anova p-value <= 0.05 | 1.52 | AMB | AMNB | Keratin 77 OS=Sarcophilus harrisii OX=9305 GN=KRT77 PE=3 SV=1 |
| **G3VKA5** | 8 | 1 | 91.5 | 0.020449471 | 0.023414381 | Anova p-value <= 0.05 | 1.52 | AMNB | AMB | Phosphoglycerate mutase OS=Sarcophilus harrisii OX=9305 GN=PGAM2 PE=3 SV=1 |
| **G3VM53** | 3 | 2 | 15.8 | 0.000366284 | 0.001288523 | Anova p-value <= 0.05 | 1.52 | AMB | AMNB | Inositol-3-phosphate synthase 1 OS=Sarcophilus harrisii OX=9305 GN=ISYNA1 PE=4 SV=1 |
| **G3VQP0** | 1 | 1 | 5.84 | 0.002062853 | 0.00422753 | Anova p-value <= 0.05 | 1.52 | AMB | AMNB | Uncharacterized protein OS=Sarcophilus harrisii OX=9305 PE=3 SV=1 |
| **G3W6M0** | 2 | 1 | 13.5 | 0.087179359 | 0.073269996 |  | 1.52 | AMB | AMNB | Glia maturation factor beta OS=Sarcophilus harrisii OX=9305 GN=GMFB PE=4 SV=1 |
| **G3VS97** | 2 | 1 | 11.7 | 0.679648655 | 0.352037866 |  | 1.52 | AMB | AMNB | Uncharacterized protein OS=Sarcophilus harrisii OX=9305 GN=RAB5C PE=4 SV=1 |
| **G3WLE2** | 4 | 1 | 26 | 0.004808261 | 0.008070226 | Anova p-value <= 0.05 | 1.51 | AMNB | AMB | Striatin 3 OS=Sarcophilus harrisii OX=9305 GN=STRN3 PE=4 SV=1 |
| **G3VUD5** | 30 | 18 | 193 | 1.94E-06 | 2.97E-05 | Anova p-value <= 0.05 | 1.51 | AMNB | AMB | Uncharacterized protein OS=Sarcophilus harrisii OX=9305 GN=ACTN2 PE=4 SV=1 |
| **G3W105** | 4 | 1 | 25.5 | 0.120373898 | 0.093912169 |  | 1.51 | AMNB | AMB | Uncharacterized protein OS=Sarcophilus harrisii OX=9305 GN=PCBP3 PE=4 SV=1 |
| **G3VKB9** | 2 | 1 | 19.4 | 0.001175776 | 0.002845715 | Anova p-value <= 0.05 | 1.51 | AMNB | AMB | Vomeronasal type-1 receptor OS=Sarcophilus harrisii OX=9305 GN=LOC100929829 PE=3 SV=1 |
| **G3VR41** | 8 | 4 | 49.8 | 1.55E-06 | 2.58E-05 | Anova p-value <= 0.05 | 1.51 | AMB | AMNB | Uncharacterized protein OS=Sarcophilus harrisii OX=9305 GN=LOC100929360 PE=3 SV=1 |
| **G3WI24** | 1 | 1 | 6.2 | 0.002592005 | 0.004936362 | Anova p-value <= 0.05 | 1.51 | AMNB | AMB | GFA domain-containing protein OS=Sarcophilus harrisii OX=9305 PE=4 SV=1 |
| **G3VZP3** | 13 | 3 | 93.9 | 0.002488282 | 0.004870003 | Anova p-value <= 0.05 | 1.5 | AMB | AMNB | IF rod domain-containing protein OS=Sarcophilus harrisii OX=9305 GN=LOC100925187 PE=3 SV=1 |
| **G3VD69** | 5 | 5 | 49.6 | 0.01189411 | 0.015465724 | Anova p-value <= 0.05 | 1.5 | AMB | AMNB | Uncharacterized protein OS=Sarcophilus harrisii OX=9305 PE=4 SV=1 |
| **G3WST7** | 4 | 1 | 23.8 | 0.007912518 | 0.011601732 | Anova p-value <= 0.05 | 1.5 | AMNB | AMB | FERM domain-containing protein OS=Sarcophilus harrisii OX=9305 PE=4 SV=1 |
| **G3X3Q2** | 1 | 1 | 16.1 | 0.488366901 | 0.272686936 |  | 1.49 | AMB | AMNB | Mitochondrial pyruvate carrier OS=Sarcophilus harrisii OX=9305 GN=MPC2 PE=3 SV=1 |
| **G3WD67** | 6 | 5 | 46.8 | 0.006039706 | 0.009569188 | Anova p-value <= 0.05 | 1.48 | AMNB | AMB | Opioid binding protein/cell adhesion molecule like OS=Sarcophilus harrisii OX=9305 GN=OPCML PE=4 SV=1 |
| **G3WEM0** | 6 | 3 | 47.4 | 0.411527147 | 0.237036135 |  | 1.48 | AMB | AMNB | Uncharacterized protein OS=Sarcophilus harrisii OX=9305 GN=RAB13 PE=4 SV=1 |
| **Q0QF23** | 10 | 1 | 77.3 | 0.003812252 | 0.006759561 | Anova p-value <= 0.05 | 1.48 | AMB | AMNB | Succinate dehydrogenase (quinone) (Fragment) OS=Sminthopsis douglasi OX=90758 GN=SDHA PE=2 SV=1 |
| **G3VAC8** | 13 | 11 | 139 | 0.000441684 | 0.00147751 | Anova p-value <= 0.05 | 1.48 | AMB | AMNB | Gln-synt_C domain-containing protein OS=Sarcophilus harrisii OX=9305 GN=LOC100930718 PE=3 SV=1 |
| **G3WVH7** | 3 | 1 | 34.1 | 0.143722459 | 0.106964239 |  | 1.48 | AMB | AMNB | Isocitrate dehydrogenase [NAD] subunit_ mitochondrial OS=Sarcophilus harrisii OX=9305 PE=3 SV=1 |
| **G3WCI6** | 1 | 1 | 4.51 | 0.034471054 | 0.035321817 | Anova p-value <= 0.05 | 1.48 | AMNB | AMB | BTB domain containing 19 OS=Sarcophilus harrisii OX=9305 GN=BTBD19 PE=4 SV=1 |
| **G3W330** | 2 | 1 | 13.9 | 0.029751623 | 0.031751361 | Anova p-value <= 0.05 | 1.48 | AMB | AMNB | Major prion protein OS=Sarcophilus harrisii OX=9305 GN=PRNP PE=3 SV=1 |
| **G3VVE8** | 2 | 1 | 12.3 | 0.005717385 | 0.009109544 | Anova p-value <= 0.05 | 1.48 | AMB | AMNB | Bestrophin OS=Sarcophilus harrisii OX=9305 PE=3 SV=1 |
| **G3W6C7** | 12 | 6 | 106 | 0.292051169 | 0.182733459 |  | 1.48 | AMNB | AMB | Uncharacterized protein OS=Sarcophilus harrisii OX=9305 GN=MAPRE2 PE=4 SV=1 |
| **G3WCM1** | 19 | 11 | 140 | 0.001969634 | 0.004110965 | Anova p-value <= 0.05 | 1.48 | AMB | AMNB | Malic enzyme OS=Sarcophilus harrisii OX=9305 GN=ME3 PE=3 SV=1 |
| **G3W492** | 2 | 2 | 13.2 | 0.054266988 | 0.050236811 |  | 1.47 | AMNB | AMB | Uncharacterized protein OS=Sarcophilus harrisii OX=9305 GN=NDUFA1 PE=4 SV=1 |
| **G3WLX9** | 2 | 2 | 13.2 | 0.001941175 | 0.004096919 | Anova p-value <= 0.05 | 1.47 | AMB | AMNB | Fibrinogen C-terminal domain-containing protein OS=Sarcophilus harrisii OX=9305 GN=FGG PE=4 SV=1 |
| **G3WK71** | 1 | 1 | 5.42 | 0.000526886 | 0.001585207 | Anova p-value <= 0.05 | 1.47 | AMNB | AMB | Uncharacterized protein OS=Sarcophilus harrisii OX=9305 PE=4 SV=1 |
| **G3WZ82** | 3 | 3 | 15.4 | 0.017656474 | 0.020936938 | Anova p-value <= 0.05 | 1.47 | AMB | AMNB | MICOS complex subunit OS=Sarcophilus harrisii OX=9305 GN=CHCHD3 PE=3 SV=1 |
| **G3WGM4** | 8 | 7 | 68.4 | 0.044372545 | 0.043090731 | Anova p-value <= 0.05 | 1.47 | AMB | AMNB | Septin-type G domain-containing protein OS=Sarcophilus harrisii OX=9305 PE=3 SV=1 |
| **G3W5N8** | 1 | 1 | 5.54 | 0.043614494 | 0.042606889 | Anova p-value <= 0.05 | 1.47 | AMB | AMNB | Uncharacterized protein OS=Sarcophilus harrisii OX=9305 PE=4 SV=1 |
| **G3W5F0** | 70 | 34 | 788 | 0.001254149 | 0.002955734 | Anova p-value <= 0.05 | 1.47 | AMNB | AMB | Sodium/potassium-transporting ATPase subunit alpha OS=Sarcophilus harrisii OX=9305 GN=ATP1A2 PE=3 SV=1 |
| **G3W3Y5** | 3 | 3 | 27.6 | 6.39E-05 | 0.000392837 | Anova p-value <= 0.05 | 1.47 | AMB | AMNB | Aldo_ket_red domain-containing protein OS=Sarcophilus harrisii OX=9305 PE=4 SV=1 |
| **G3VEK0** | 1 | 1 | 6.25 | 0.472561145 | 0.266039967 |  | 1.47 | AMNB | AMB | Uncharacterized protein OS=Sarcophilus harrisii OX=9305 GN=CEND1 PE=4 SV=1 |
| **G3WWG6** | 7 | 3 | 71.4 | 0.024849495 | 0.027476984 | Anova p-value <= 0.05 | 1.46 | AMB | AMNB | Gp_dh_N domain-containing protein OS=Sarcophilus harrisii OX=9305 GN=LOC105749478 PE=3 SV=1 |
| **G3VDZ9** | 10 | 5 | 68.2 | 2.10E-06 | 3.12E-05 | Anova p-value <= 0.05 | 1.46 | AMB | AMNB | Alpha-1_4 glucan phosphorylase OS=Sarcophilus harrisii OX=9305 GN=PYGL PE=3 SV=1 |
| **G3VUN8** | 17 | 14 | 161 | 5.05E-06 | 6.21E-05 | Anova p-value <= 0.05 | 1.46 | AMB | AMNB | NDRG family member 2 OS=Sarcophilus harrisii OX=9305 GN=NDRG2 PE=4 SV=1 |
| **G3VB71** | 4 | 4 | 28.7 | 7.62E-06 | 8.13E-05 | Anova p-value <= 0.05 | 1.46 | AMNB | AMB | Solute carrier family 25 member 22 OS=Sarcophilus harrisii OX=9305 GN=SLC25A22 PE=3 SV=1 |
| **G3WL51** | 2 | 2 | 10.9 | 0.005531065 | 0.008964186 | Anova p-value <= 0.05 | 1.46 | AMNB | AMB | Tetraspanin OS=Sarcophilus harrisii OX=9305 GN=CD9 PE=3 SV=1 |
| **A0A2Z2GP65** | 1 | 1 | 5.57 | 0.160716411 | 0.115655219 |  | 1.45 | AMB | AMNB | Interphotoreceptor retinoid binding protein (Fragment) OS=Planigale sp. WAM47329 OX=1985242 GN=IRBP PE=4 SV=1 |
| **G3W1Q7** | 3 | 3 | 18.6 | 0.000224834 | 0.00092153 | Anova p-value <= 0.05 | 1.45 | AMNB | AMB | Proliferation and apoptosis adaptor protein 15 OS=Sarcophilus harrisii OX=9305 GN=PEA15 PE=4 SV=1 |
| **G3X317** | 17 | 14 | 119 | 0.002404009 | 0.004754421 | Anova p-value <= 0.05 | 1.45 | AMB | AMNB | V-type proton ATPase subunit C OS=Sarcophilus harrisii OX=9305 GN=ATP6V1C1 PE=3 SV=1 |
| **G3X0H1** | 14 | 12 | 135 | 0.00032922 | 0.001193683 | Anova p-value <= 0.05 | 1.45 | AMNB | AMB | Uncharacterized protein OS=Sarcophilus harrisii OX=9305 GN=VDAC3 PE=4 SV=1 |
| **G3VSW3** | 21 | 9 | 192 | 0.030063046 | 0.031985376 | Anova p-value <= 0.05 | 1.45 | AMNB | AMB | Histone H3 OS=Sarcophilus harrisii OX=9305 PE=3 SV=1 |
| **G3WU20** | 24 | 19 | 267 | 1.39E-07 | 4.64E-06 | Anova p-value <= 0.05 | 1.45 | AMB | AMNB | Triosephosphate isomerase OS=Sarcophilus harrisii OX=9305 GN=TPI1 PE=3 SV=1 |
| **G3WJB3** | 6 | 5 | 49.6 | 0.005338771 | 0.008778299 | Anova p-value <= 0.05 | 1.44 | AMB | AMNB | Peptidylprolyl isomerase OS=Sarcophilus harrisii OX=9305 PE=4 SV=1 |
| **G3VAB7** | 9 | 8 | 61.4 | 0.001022996 | 0.002526771 | Anova p-value <= 0.05 | 1.44 | AMNB | AMB | Eukaryotic translation initiation factor 4H OS=Sarcophilus harrisii OX=9305 GN=EIF4H PE=4 SV=1 |
| **G3VW13** | 1 | 1 | 5.43 | 9.29E-05 | 0.000509978 | Anova p-value <= 0.05 | 1.44 | AMB | AMNB | Ectonucleotide pyrophosphatase/phosphodiesterase 6 OS=Sarcophilus harrisii OX=9305 GN=ENPP6 PE=4 SV=1 |
| **G3X062** | 6 | 5 | 32.5 | 5.29E-05 | 0.000344207 | Anova p-value <= 0.05 | 1.44 | AMB | AMNB | Ribosomal protein L12 OS=Sarcophilus harrisii OX=9305 GN=RPL12 PE=3 SV=1 |
| **G3W271** | 1 | 1 | 4.63 | 0.365900004 | 0.217625335 |  | 1.44 | AMB | AMNB | Uncharacterized protein OS=Sarcophilus harrisii OX=9305 GN=LOC100918011 PE=3 SV=1 |
| **G3VAB4** | 7 | 6 | 62.4 | 4.50E-06 | 5.66E-05 | Anova p-value <= 0.05 | 1.44 | AMB | AMNB | Deacetylase sirtuin-type domain-containing protein OS=Sarcophilus harrisii OX=9305 PE=4 SV=1 |
| **G3WBE0** | 11 | 4 | 78.4 | 0.0005261 | 0.001585207 | Anova p-value <= 0.05 | 1.44 | AMB | AMNB | Mitogen-activated protein kinase OS=Sarcophilus harrisii OX=9305 GN=MAPK3 PE=4 SV=1 |
| **G3WM40** | 8 | 4 | 74.3 | 0.046180782 | 0.044423372 | Anova p-value <= 0.05 | 1.43 | AMNB | AMB | Uncharacterized protein OS=Sarcophilus harrisii OX=9305 GN=HMGB1 PE=4 SV=1 |
| **G3W2B2** | 70 | 55 | 810 | 0.000446682 | 0.00147751 | Anova p-value <= 0.05 | 1.43 | AMB | AMNB | Amidohydro-rel domain-containing protein OS=Sarcophilus harrisii OX=9305 GN=DPYSL2 PE=4 SV=1 |
| **G3VYT0** | 15 | 6 | 100 | 0.000308577 | 0.001155883 | Anova p-value <= 0.05 | 1.43 | AMNB | AMB | IF rod domain-containing protein OS=Sarcophilus harrisii OX=9305 GN=LOC100924753 PE=3 SV=1 |
| **G3WNX0** | 3 | 2 | 34.9 | 9.63E-05 | 0.000523497 | Anova p-value <= 0.05 | 1.43 | AMNB | AMB | Claudin OS=Sarcophilus harrisii OX=9305 GN=CLDN11 PE=3 SV=1 |
| **G3WFH5** | 3 | 2 | 18 | 5.77E-05 | 0.000366833 | Anova p-value <= 0.05 | 1.43 | AMB | AMNB | GST C-terminal domain-containing protein OS=Sarcophilus harrisii OX=9305 GN=EEF1E1 PE=4 SV=1 |
| **G3WJK7** | 62 | 16 | 658 | 0.000325828 | 0.001193683 | Anova p-value <= 0.05 | 1.43 | AMNB | AMB | Tubulin alpha chain OS=Sarcophilus harrisii OX=9305 GN=LOC100932522 PE=3 SV=1 |
| **G3VR80** | 4 | 1 | 21.1 | 0.010241807 | 0.013865399 | Anova p-value <= 0.05 | 1.43 | AMNB | AMB | Extended synaptotagmin 1 OS=Sarcophilus harrisii OX=9305 GN=ESYT1 PE=4 SV=1 |
| **G3W186** | 1 | 1 | 6 | 0.059941594 | 0.054684489 |  | 1.43 | AMNB | AMB | Uncharacterized protein OS=Sarcophilus harrisii OX=9305 PE=4 SV=1 |
| **G3X3W7** | 3 | 2 | 25.7 | 0.001527225 | 0.003469215 | Anova p-value <= 0.05 | 1.43 | AMB | AMNB | Oligodendrocyte myelin glycoprotein OS=Sarcophilus harrisii OX=9305 GN=OMG PE=4 SV=1 |
| **G3VI51** | 1 | 1 | 5.72 | 0.099892415 | 0.081382786 |  | 1.43 | AMB | AMNB | Uncharacterized protein OS=Sarcophilus harrisii OX=9305 PE=3 SV=1 |
| **G3VEV4** | 5 | 3 | 25.1 | 0.015114406 | 0.018484432 | Anova p-value <= 0.05 | 1.42 | AMB | AMNB | RPAP3_C domain-containing protein OS=Sarcophilus harrisii OX=9305 GN=LOC100923712 PE=4 SV=1 |
| **G3WRK4** | 25 | 5 | 213 | 0.001566991 | 0.003512121 | Anova p-value <= 0.05 | 1.42 | AMB | AMNB | Neural cell adhesion molecule 1 OS=Sarcophilus harrisii OX=9305 GN=NCAM1 PE=4 SV=1 |
| **G3X052** | 10 | 8 | 58.4 | 0.001579082 | 0.003516402 | Anova p-value <= 0.05 | 1.42 | AMB | AMNB | AA_TRNA_LIGASE_II domain-containing protein OS=Sarcophilus harrisii OX=9305 GN=SARS PE=4 SV=1 |
| **G3VLK6** | 21 | 9 | 135 | 0.000513546 | 0.00157013 | Anova p-value <= 0.05 | 1.42 | AMNB | AMB | Calcium-transporting ATPase OS=Sarcophilus harrisii OX=9305 GN=ATP2B4 PE=3 SV=1 |
| **G3WS10** | 1 | 1 | 5.65 | 0.000466195 | 0.001506806 | Anova p-value <= 0.05 | 1.42 | AMB | AMNB | Uncharacterized protein OS=Sarcophilus harrisii OX=9305 GN=PFDN1 PE=4 SV=1 |
| **G3WYW3** | 1 | 1 | 5.48 | 0.52015294 | 0.286197278 |  | 1.42 | AMB | AMNB | Uncharacterized protein OS=Sarcophilus harrisii OX=9305 GN=NDUFS5 PE=4 SV=1 |
| **G3WP31** | 5 | 1 | 47.4 | 0.000235454 | 0.000951273 | Anova p-value <= 0.05 | 1.42 | AMB | AMNB | Uncharacterized protein OS=Sarcophilus harrisii OX=9305 GN=CKMT2 PE=3 SV=1 |
| **G3VVH5** | 1 | 1 | 13.8 | 0.325773098 | 0.198775585 |  | 1.42 | AMNB | AMB | LanC like 2 OS=Sarcophilus harrisii OX=9305 GN=LANCL2 PE=4 SV=1 |
| **G3WAJ5** | 29 | 24 | 208 | 0.014242813 | 0.017706912 | Anova p-value <= 0.05 | 1.42 | AMB | AMNB | Uncharacterized protein OS=Sarcophilus harrisii OX=9305 GN=MAP1B PE=4 SV=1 |
| **G3WX26** | 18 | 15 | 184 | 0.006168351 | 0.009727537 | Anova p-value <= 0.05 | 1.41 | AMNB | AMB | Microtubule-associated protein OS=Sarcophilus harrisii OX=9305 GN=MAPT PE=4 SV=1 |
| **A0A075QV88** | 5 | 2 | 40.5 | 0.001198066 | 0.002860809 | Anova p-value <= 0.05 | 1.41 | AMNB | AMB | Cytochrome c oxidase subunit 2 OS=Phascogale calura OX=38776 GN=COX2 PE=3 SV=1 |
| **G3WX23** | 14 | 8 | 129 | 0.005682212 | 0.009079981 | Anova p-value <= 0.05 | 1.41 | AMNB | AMB | WD_REPEATS_REGION domain-containing protein OS=Sarcophilus harrisii OX=9305 GN=GNB4 PE=4 SV=1 |
| **G3W4U3** | 1 | 1 | 5.45 | 0.191439073 | 0.130934059 |  | 1.41 | AMNB | AMB | Hexosyltransferase OS=Sarcophilus harrisii OX=9305 GN=B3GNT4 PE=3 SV=1 |
| **G3WS52** | 4 | 4 | 25.8 | 0.002193934 | 0.004431933 | Anova p-value <= 0.05 | 1.41 | AMNB | AMB | 3-hydroxyisobutyrate dehydrogenase OS=Sarcophilus harrisii OX=9305 GN=HIBADH PE=3 SV=1 |
| **G3VDE0** | 3 | 3 | 16.7 | 0.013768782 | 0.017422704 | Anova p-value <= 0.05 | 1.41 | AMB | AMNB | Ig-like domain-containing protein OS=Sarcophilus harrisii OX=9305 PE=4 SV=1 |
| **G3WW10** | 10 | 9 | 84.5 | 0.007948188 | 0.011616753 | Anova p-value <= 0.05 | 1.41 | AMB | AMNB | Arp2/3 complex 34 kDa subunit OS=Sarcophilus harrisii OX=9305 GN=ARPC2 PE=3 SV=1 |
| **G3WDG2** | 3 | 2 | 25.1 | 0.996345235 | 0.458737749 |  | 1.4 | AMB | AMNB | Uncharacterized protein OS=Sarcophilus harrisii OX=9305 GN=CANX PE=3 SV=1 |
| **G3WS06** | 1 | 1 | 4.77 | 0.65244718 | 0.339267097 |  | 1.4 | AMB | AMNB | UBIQUITIN_CONJUGAT_2 domain-containing protein OS=Sarcophilus harrisii OX=9305 GN=UBE2L6 PE=3 SV=1 |
| **G3WWQ6** | 3 | 2 | 17.3 | 0.005116462 | 0.008461965 | Anova p-value <= 0.05 | 1.4 | AMNB | AMB | Uncharacterized protein OS=Sarcophilus harrisii OX=9305 PE=3 SV=1 |
| **G3W9X2** | 2 | 2 | 10.5 | 0.00288103 | 0.00530765 | Anova p-value <= 0.05 | 1.4 | AMB | AMNB | EF-hand domain family member D2 OS=Sarcophilus harrisii OX=9305 GN=EFHD2 PE=4 SV=1 |
| **G3VCR6** | 1 | 1 | 7.39 | 0.00398214 | 0.006930438 | Anova p-value <= 0.05 | 1.4 | AMB | AMNB | Integrin beta OS=Sarcophilus harrisii OX=9305 GN=ITGB8 PE=3 SV=1 |
| **G3WK52** | 1 | 1 | 10.4 | 0.078825299 | 0.068277876 |  | 1.4 | AMB | AMNB | RING-type domain-containing protein OS=Sarcophilus harrisii OX=9305 GN=MEX3A PE=4 SV=1 |
| **G3WE17** | 7 | 5 | 28.6 | 0.133663987 | 0.100670455 |  | 1.39 | AMB | AMNB | Uncharacterized protein OS=Sarcophilus harrisii OX=9305 PE=4 SV=1 |
| **G3WP58** | 4 | 1 | 43.3 | 0.10783639 | 0.086272719 |  | 1.39 | AMB | AMNB | Keratin 82 OS=Sarcophilus harrisii OX=9305 GN=KRT82 PE=3 SV=1 |
| **G3VEN1** | 2 | 2 | 10.7 | 8.69E-05 | 0.000496248 | Anova p-value <= 0.05 | 1.39 | AMB | AMNB | Uncharacterized protein OS=Sarcophilus harrisii OX=9305 PE=4 SV=1 |
| **G3WDS1** | 24 | 16 | 203 | 0.011309713 | 0.01487684 | Anova p-value <= 0.05 | 1.39 | AMNB | AMB | Aspartate aminotransferase OS=Sarcophilus harrisii OX=9305 GN=GOT2 PE=4 SV=1 |
| **G3VXS6** | 18 | 3 | 225 | 0.08199473 | 0.069846624 |  | 1.39 | AMB | AMNB | Uncharacterized protein OS=Sarcophilus harrisii OX=9305 PE=3 SV=1 |
| **G3VUV8** | 2 | 2 | 17.6 | 0.206280564 | 0.138736224 |  | 1.39 | AMNB | AMB | N-acetyltransferase domain-containing protein OS=Sarcophilus harrisii OX=9305 PE=4 SV=1 |
| **G3WUZ3** | 6 | 4 | 52.8 | 0.005661246 | 0.009079981 | Anova p-value <= 0.05 | 1.39 | AMB | AMNB | Quinoid dihydropteridine reductase OS=Sarcophilus harrisii OX=9305 GN=QDPR PE=4 SV=1 |
| **G3WMJ2** | 27 | 21 | 157 | 4.19E-06 | 5.51E-05 | Anova p-value <= 0.05 | 1.39 | AMNB | AMB | Prolyl endopeptidase OS=Sarcophilus harrisii OX=9305 GN=PREP PE=4 SV=1 |
| **O97768** | 3 | 1 | 17.8 | 0.489810662 | 0.272954179 |  | 1.39 | AMB | AMNB | RBM1 OS=Sminthopsis macroura OX=9302 PE=2 SV=1 |
| **G3VG54** | 11 | 7 | 110 | 0.009544759 | 0.013297393 | Anova p-value <= 0.05 | 1.39 | AMB | AMNB | Histone H2A OS=Sarcophilus harrisii OX=9305 PE=3 SV=1 |
| **G3VW64** | 3 | 3 | 18.6 | 0.008563994 | 0.012254663 | Anova p-value <= 0.05 | 1.39 | AMB | AMNB | Myosin light chain_ phosphorylatable_ fast skeletal muscle OS=Sarcophilus harrisii OX=9305 GN=MYLPF PE=4 SV=1 |
| **G3VQV9** | 2 | 1 | 10.6 | 0.218024792 | 0.144911842 |  | 1.39 | AMNB | AMB | Ankyrin repeat domain 12 OS=Sarcophilus harrisii OX=9305 GN=ANKRD12 PE=4 SV=1 |
| **G3VLK7** | 3 | 1 | 24 | 0.020391277 | 0.023395109 | Anova p-value <= 0.05 | 1.39 | AMB | AMNB | Protein arginine methyltransferase 1 OS=Sarcophilus harrisii OX=9305 GN=PRMT1 PE=3 SV=1 |
| **G3X239** | 9 | 7 | 57 | 0.002553689 | 0.004887545 | Anova p-value <= 0.05 | 1.38 | AMB | AMNB | Rho GTPase activating protein 32 OS=Sarcophilus harrisii OX=9305 GN=ARHGAP32 PE=4 SV=1 |
| **G3VIN9** | 10 | 7 | 56 | 0.000628198 | 0.001794565 | Anova p-value <= 0.05 | 1.38 | AMNB | AMB | Uncharacterized protein OS=Sarcophilus harrisii OX=9305 PE=4 SV=1 |
| **G3W9T9** | 3 | 3 | 26.9 | 0.091973457 | 0.076391133 |  | 1.38 | AMB | AMNB | Peroxiredoxin 4 OS=Sarcophilus harrisii OX=9305 GN=PRDX4 PE=4 SV=1 |
| **G3WNM0** | 21 | 18 | 226 | 7.60E-05 | 0.000462485 | Anova p-value <= 0.05 | 1.38 | AMB | AMNB | Nucleoside diphosphate kinase OS=Sarcophilus harrisii OX=9305 GN=NME1-NME2 PE=3 SV=1 |
| **G3VQL6** | 5 | 3 | 32.2 | 0.000122828 | 0.00063738 | Anova p-value <= 0.05 | 1.38 | AMNB | AMB | Oxysterol-binding protein OS=Sarcophilus harrisii OX=9305 GN=OSBPL5 PE=3 SV=1 |
| **G3W108** | 56 | 5 | 867 | 8.20E-05 | 0.000478292 | Anova p-value <= 0.05 | 1.38 | AMNB | AMB | Tubulin beta chain OS=Sarcophilus harrisii OX=9305 GN=TUBB PE=3 SV=1 |
| **G3VBZ5** | 11 | 5 | 80.4 | 0.133209129 | 0.100461644 |  | 1.37 | AMNB | AMB | FERM domain-containing protein OS=Sarcophilus harrisii OX=9305 PE=4 SV=1 |
| **G3WYV2** | 5 | 3 | 31.2 | 0.000110968 | 0.0005866 | Anova p-value <= 0.05 | 1.37 | AMNB | AMB | Uncharacterized protein OS=Sarcophilus harrisii OX=9305 GN=DCTN3 PE=4 SV=1 |
| **G3WKZ7** | 3 | 3 | 18 | 0.364901735 | 0.217260052 |  | 1.37 | AMB | AMNB | Uncharacterized protein OS=Sarcophilus harrisii OX=9305 GN=LIN7C PE=4 SV=1 |
| **G3WLA7** | 15 | 8 | 117 | 0.053451781 | 0.049684801 |  | 1.37 | AMNB | AMB | Family with sequence similarity 135 member A OS=Sarcophilus harrisii OX=9305 GN=FAM135A PE=4 SV=1 |
| **G3VFG0** | 3 | 3 | 17.7 | 0.002651434 | 0.004999047 | Anova p-value <= 0.05 | 1.37 | AMB | AMNB | WEE1 homolog 2 OS=Sarcophilus harrisii OX=9305 GN=WEE2 PE=3 SV=1 |
| **G3VPT3** | 13 | 10 | 83.4 | 2.84E-07 | 8.03E-06 | Anova p-value <= 0.05 | 1.37 | AMB | AMNB | Aldedh domain-containing protein OS=Sarcophilus harrisii OX=9305 PE=3 SV=1 |
| **G3W3Z5** | 3 | 2 | 19.6 | 0.116599435 | 0.091532421 |  | 1.37 | AMB | AMNB | Glia maturation factor OS=Sarcophilus harrisii OX=9305 GN=GMFG PE=3 SV=1 |
| **G3W0N3** | 29 | 20 | 176 | 3.38E-06 | 4.55E-05 | Anova p-value <= 0.05 | 1.37 | AMNB | AMB | Uncharacterized protein OS=Sarcophilus harrisii OX=9305 PE=4 SV=1 |
| **G3WHL7** | 7 | 3 | 54 | 0.001614958 | 0.003568197 | Anova p-value <= 0.05 | 1.37 | AMNB | AMB | Amidohydro-rel domain-containing protein OS=Sarcophilus harrisii OX=9305 GN=DPYS PE=4 SV=1 |
| **G3WJX8** | 16 | 12 | 107 | 0.000577629 | 0.001692004 | Anova p-value <= 0.05 | 1.37 | AMB | AMNB | Platelet-activating factor acetylhydrolase IB subunit alpha OS=Sarcophilus harrisii OX=9305 GN=PAFAH1B1 PE=3 SV=1 |
| **G3WM01** | 17 | 3 | 262 | 0.001834689 | 0.003930846 | Anova p-value <= 0.05 | 1.37 | AMNB | AMB | Tubulin beta chain OS=Sarcophilus harrisii OX=9305 PE=3 SV=1 |
| **G3WV70** | 6 | 3 | 42.1 | 0.011621053 | 0.01525091 | Anova p-value <= 0.05 | 1.36 | AMB | AMNB | Cell division cycle 42 OS=Sarcophilus harrisii OX=9305 GN=CDC42 PE=4 SV=1 |
| **G3WS12** | 13 | 8 | 83.1 | 0.010513359 | 0.014058167 | Anova p-value <= 0.05 | 1.36 | AMNB | AMB | Uncharacterized protein OS=Sarcophilus harrisii OX=9305 GN=SLC25A12 PE=3 SV=1 |
| **G3VG52** | 7 | 5 | 45.7 | 0.000417105 | 0.001421232 | Anova p-value <= 0.05 | 1.36 | AMB | AMNB | BH4_AAA_HYDROXYL_2 domain-containing protein OS=Sarcophilus harrisii OX=9305 PE=4 SV=1 |
| **G3VWP9** | 2 | 2 | 11.8 | 0.330569654 | 0.201111185 |  | 1.36 | AMNB | AMB | Peptidyl arginine deiminase 2 OS=Sarcophilus harrisii OX=9305 GN=PADI2 PE=4 SV=1 |
| **G3WQC4** | 11 | 10 | 100 | 0.082934443 | 0.070329358 |  | 1.36 | AMB | AMNB | Calreticulin OS=Sarcophilus harrisii OX=9305 GN=CALR PE=3 SV=1 |
| **G3VSJ9** | 2 | 2 | 10.7 | 0.007185619 | 0.010855226 | Anova p-value <= 0.05 | 1.36 | AMB | AMNB | 26S proteasome non-ATPase regulatory subunit 2 OS=Sarcophilus harrisii OX=9305 GN=PSMD2 PE=3 SV=1 |
| **G3WV74** | 9 | 5 | 80.3 | 0.000161544 | 0.00076784 | Anova p-value <= 0.05 | 1.36 | AMNB | AMB | Prohibitin 2 OS=Sarcophilus harrisii OX=9305 GN=PHB2 PE=4 SV=1 |
| **G3VTV0** | 10 | 4 | 56.2 | 0.010131668 | 0.013775748 | Anova p-value <= 0.05 | 1.36 | AMB | AMNB | Uncharacterized protein OS=Sarcophilus harrisii OX=9305 PE=3 SV=1 |
| **G3WFK8** | 14 | 13 | 152 | 0.008968936 | 0.012714392 | Anova p-value <= 0.05 | 1.36 | AMNB | AMB | Uncharacterized protein OS=Sarcophilus harrisii OX=9305 GN=BASP1 PE=4 SV=1 |
| **G3X2V4** | 1 | 1 | 5.9 | 0.336718154 | 0.203695989 |  | 1.35 | AMNB | AMB | RNA-binding protein 8A OS=Sarcophilus harrisii OX=9305 GN=RBM8A PE=3 SV=1 |
| **G3VPJ8** | 11 | 7 | 60.2 | 0.000996923 | 0.002484066 | Anova p-value <= 0.05 | 1.35 | AMB | AMNB | SH3 domain GRB2 like endophilin interacting protein 1 OS=Sarcophilus harrisii OX=9305 GN=SGIP1 PE=4 SV=1 |
| **G3VJV1** | 2 | 2 | 18.5 | 0.000218971 | 0.000912689 | Anova p-value <= 0.05 | 1.35 | AMB | AMNB | Platelet activating factor acetylhydrolase 1b catalytic subunit 3 OS=Sarcophilus harrisii OX=9305 GN=PAFAH1B3 PE=4 SV=1 |
| **G3VG89** | 2 | 1 | 11.2 | 0.099997652 | 0.081382786 |  | 1.35 | AMB | AMNB | Kinesin-like protein OS=Sarcophilus harrisii OX=9305 GN=KIF2A PE=3 SV=1 |
| **G3VGH7** | 2 | 2 | 11.1 | 0.00966394 | 0.013430351 | Anova p-value <= 0.05 | 1.35 | AMB | AMNB | Glucosamine-6-phosphate isomerase OS=Sarcophilus harrisii OX=9305 GN=GNPDA2 PE=3 SV=1 |
| **G3WZB9** | 36 | 21 | 328 | 4.34E-06 | 5.58E-05 | Anova p-value <= 0.05 | 1.35 | AMB | AMNB | Alpha-1_4 glucan phosphorylase OS=Sarcophilus harrisii OX=9305 GN=PYGB PE=3 SV=1 |
| **G3W3V4** | 2 | 2 | 11.5 | 0.305646125 | 0.189562144 |  | 1.35 | AMB | AMNB | Uncharacterized protein OS=Sarcophilus harrisii OX=9305 PE=4 SV=1 |
| **G3WLN5** | 3 | 3 | 17.3 | 0.01930212 | 0.022510795 | Anova p-value <= 0.05 | 1.35 | AMB | AMNB | NADH:ubiquinone oxidoreductase core subunit S7 OS=Sarcophilus harrisii OX=9305 GN=NDUFS7 PE=3 SV=1 |
| **G3VH86** | 4 | 1 | 28.8 | 0.241756732 | 0.157720097 |  | 1.35 | AMB | AMNB | Uncharacterized protein OS=Sarcophilus harrisii OX=9305 GN=DCPS PE=4 SV=1 |
| **G3VJF7** | 4 | 1 | 29.1 | 0.003173988 | 0.005754112 | Anova p-value <= 0.05 | 1.35 | AMB | AMNB | Serine/threonine-protein phosphatase 2A 55 kDa regulatory subunit B OS=Sarcophilus harrisii OX=9305 PE=3 SV=1 |
| **G3WAT7** | 5 | 2 | 27.1 | 0.01289978 | 0.016470476 | Anova p-value <= 0.05 | 1.35 | AMNB | AMB | Serine/threonine-protein phosphatase 2A 56 kDa regulatory subunit OS=Sarcophilus harrisii OX=9305 GN=PPP2R5E PE=3 SV=1 |
| **G3WK03** | 4 | 3 | 25.7 | 0.0518945 | 0.048921261 |  | 1.34 | AMNB | AMB | Lebercilin domain-containing protein OS=Sarcophilus harrisii OX=9305 PE=4 SV=1 |
| **G3X268** | 3 | 1 | 16.7 | 0.11672448 | 0.091532421 |  | 1.34 | AMNB | AMB | Mitochondrial ribosomal protein S2 OS=Sarcophilus harrisii OX=9305 GN=MRPS2 PE=3 SV=1 |
| **G3VVC9** | 3 | 3 | 17 | 0.010099917 | 0.013765668 | Anova p-value <= 0.05 | 1.34 | AMB | AMNB | Myelin associated glycoprotein OS=Sarcophilus harrisii OX=9305 GN=MAG PE=4 SV=1 |
| **G3WAT3** | 5 | 3 | 43.9 | 0.069209164 | 0.061550849 |  | 1.34 | AMB | AMNB | Uncharacterized protein OS=Sarcophilus harrisii OX=9305 PE=4 SV=1 |
| **G3W9E4** | 8 | 5 | 64.1 | 0.000829826 | 0.002214172 | Anova p-value <= 0.05 | 1.34 | AMB | AMNB | Uncharacterized protein OS=Sarcophilus harrisii OX=9305 PE=4 SV=1 |
| **G3WBD9** | 1 | 1 | 5.51 | 0.019846839 | 0.022909881 | Anova p-value <= 0.05 | 1.34 | AMB | AMNB | LRRcap domain-containing protein OS=Sarcophilus harrisii OX=9305 PE=4 SV=1 |
| **G3W7P4** | 2 | 1 | 11.2 | 0.010481373 | 0.014048608 | Anova p-value <= 0.05 | 1.34 | AMNB | AMB | Protein geranylgeranyltransferase type I subunit beta OS=Sarcophilus harrisii OX=9305 GN=PGGT1B PE=4 SV=1 |
| **G3VJZ5** | 1 | 1 | 11.8 | 0.174584766 | 0.1224736 |  | 1.34 | AMNB | AMB | Haloacid dehalogenase like hydrolase domain containing 5 OS=Sarcophilus harrisii OX=9305 GN=HDHD5 PE=4 SV=1 |
| **G3W6U8** | 9 | 8 | 60.8 | 1.50E-06 | 2.57E-05 | Anova p-value <= 0.05 | 1.34 | AMNB | AMB | EF-hand calcium binding domain 6 OS=Sarcophilus harrisii OX=9305 GN=EFCAB6 PE=4 SV=1 |
| **G3W036** | 4 | 2 | 22 | 0.37151708 | 0.219810507 |  | 1.34 | AMB | AMNB | Uncharacterized protein OS=Sarcophilus harrisii OX=9305 GN=RAB18 PE=4 SV=1 |
| **G3VSL2** | 10 | 6 | 105 | 0.003924551 | 0.006872504 | Anova p-value <= 0.05 | 1.33 | AMNB | AMB | Sodium/potassium-transporting ATPase subunit beta OS=Sarcophilus harrisii OX=9305 GN=ATP1B1 PE=3 SV=1 |
| **G3VAR7** | 2 | 2 | 11.9 | 0.357326544 | 0.213875494 |  | 1.33 | AMNB | AMB | Uncharacterized protein OS=Sarcophilus harrisii OX=9305 PE=4 SV=1 |
| **G3W1V7** | 3 | 2 | 17.4 | 7.88E-05 | 0.000474365 | Anova p-value <= 0.05 | 1.33 | AMNB | AMB | 40S ribosomal protein S3a OS=Sarcophilus harrisii OX=9305 GN=RPS3A PE=3 SV=1 |
| **G3VG94** | 2 | 1 | 11.2 | 0.007801633 | 0.011521639 | Anova p-value <= 0.05 | 1.33 | AMB | AMNB | BTB_2 domain-containing protein OS=Sarcophilus harrisii OX=9305 PE=4 SV=1 |
| **G3WZ80** | 4 | 4 | 28.1 | 0.038249099 | 0.038291318 | Anova p-value <= 0.05 | 1.33 | AMB | AMNB | NADH:ubiquinone oxidoreductase core subunit S3 OS=Sarcophilus harrisii OX=9305 GN=NDUFS3 PE=3 SV=1 |
| **G3X063** | 37 | 28 | 265 | 0.002637427 | 0.004989268 | Anova p-value <= 0.05 | 1.33 | AMNB | AMB | NADH:ubiquinone oxidoreductase core subunit S1 OS=Sarcophilus harrisii OX=9305 GN=NDUFS1 PE=3 SV=1 |
| **G3VNV7** | 23 | 10 | 178 | 0.341603798 | 0.20577123 |  | 1.33 | AMB | AMNB | Histone H2B OS=Sarcophilus harrisii OX=9305 GN=LOC100928127 PE=3 SV=1 |
| **G3WND7** | 3 | 1 | 23.1 | 0.014706172 | 0.018082954 | Anova p-value <= 0.05 | 1.33 | AMNB | AMB | DEAD-box helicase 46 OS=Sarcophilus harrisii OX=9305 GN=DDX46 PE=4 SV=1 |
| **G3VJM1** | 2 | 2 | 7.59 | 0.333114117 | 0.2021644 |  | 1.33 | AMB | AMNB | Methionine synthase OS=Sarcophilus harrisii OX=9305 GN=MTR PE=4 SV=1 |
| **G3WJE6** | 3 | 1 | 18.7 | 0.002504287 | 0.004884427 | Anova p-value <= 0.05 | 1.33 | AMB | AMNB | Uncharacterized protein OS=Sarcophilus harrisii OX=9305 GN=RAP2C PE=4 SV=1 |
| **G3X1W1** | 3 | 2 | 15.8 | 0.163179629 | 0.116981314 |  | 1.33 | AMB | AMNB | Prefoldin subunit 3 OS=Sarcophilus harrisii OX=9305 GN=LOC100935065 PE=3 SV=1 |
| **G3WQ17** | 4 | 3 | 23 | 0.011870082 | 0.015465724 | Anova p-value <= 0.05 | 1.33 | AMB | AMNB | Sperm associated antigen 9 OS=Sarcophilus harrisii OX=9305 GN=SPAG9 PE=4 SV=1 |
| **G3WYQ9** | 2 | 2 | 10.7 | 0.034095279 | 0.035122554 | Anova p-value <= 0.05 | 1.33 | AMB | AMNB | Uncharacterized protein OS=Sarcophilus harrisii OX=9305 PE=4 SV=1 |
| **G3WTI8** | 2 | 2 | 9.55 | 0.206743217 | 0.138882247 |  | 1.33 | AMB | AMNB | Catenin delta 1 OS=Sarcophilus harrisii OX=9305 GN=CTNND1 PE=4 SV=1 |
| **A4GX20** | 19 | 1 | 166 | 0.023688279 | 0.026427319 | Anova p-value <= 0.05 | 1.33 | AMNB | AMB | Mitochondrial adenine nucleotide translocator ANT1 (Fragment) OS=Antechinus flavipes OX=38775 PE=2 SV=1 |
| **G3WC55** | 3 | 2 | 22 | 0.033285071 | 0.034439851 | Anova p-value <= 0.05 | 1.32 | AMNB | AMB | Transgelin OS=Sarcophilus harrisii OX=9305 GN=TAGLN PE=3 SV=1 |
| **G3W9L8** | 4 | 4 | 21.6 | 0.085837891 | 0.072465583 |  | 1.32 | AMB | AMNB | Isocitrate dehydrogenase [NADP] OS=Sarcophilus harrisii OX=9305 GN=IDH1 PE=3 SV=1 |
| **G3WGT2** | 15 | 12 | 164 | 0.000486548 | 0.00152131 | Anova p-value <= 0.05 | 1.32 | AMB | AMNB | Fumarate hydratase OS=Sarcophilus harrisii OX=9305 GN=FH PE=3 SV=1 |
| **G3WU12** | 3 | 1 | 18.7 | 0.001763913 | 0.003808058 | Anova p-value <= 0.05 | 1.32 | AMNB | AMB | Proteasome subunit beta OS=Sarcophilus harrisii OX=9305 GN=PSMB7 PE=3 SV=1 |
| **G3VH62** | 4 | 2 | 23.9 | 0.002329714 | 0.004639934 | Anova p-value <= 0.05 | 1.32 | AMB | AMNB | Calcium/calmodulin dependent serine protein kinase OS=Sarcophilus harrisii OX=9305 GN=CASK PE=3 SV=1 |
| **G3VD23** | 1 | 1 | 5.52 | 0.340520049 | 0.205337091 |  | 1.32 | AMNB | AMB | Uncharacterized protein OS=Sarcophilus harrisii OX=9305 PE=4 SV=1 |
| **G3VUH7** | 9 | 8 | 93.5 | 0.030843511 | 0.032590974 | Anova p-value <= 0.05 | 1.32 | AMB | AMNB | ig domain-containing protein OS=Sarcophilus harrisii OX=9305 GN=THY1 PE=4 SV=1 |
| **G3W7J8** | 10 | 4 | 72 | 0.015662529 | 0.019010937 | Anova p-value <= 0.05 | 1.32 | AMB | AMNB | Discs large MAGUK scaffold protein 1 OS=Sarcophilus harrisii OX=9305 GN=DLG1 PE=3 SV=1 |
| **G3VXJ6** | 3 | 3 | 17.7 | 0.180526227 | 0.125596436 |  | 1.32 | AMB | AMNB | Uncharacterized protein OS=Sarcophilus harrisii OX=9305 GN=RPS18 PE=3 SV=1 |
| **G3VPA3** | 2 | 2 | 12.5 | 0.103619224 | 0.083489293 |  | 1.32 | AMNB | AMB | Uncharacterized protein OS=Sarcophilus harrisii OX=9305 GN=SNCG PE=3 SV=1 |
| **G3WUI0** | 1 | 1 | 5.25 | 0.001633991 | 0.003596203 | Anova p-value <= 0.05 | 1.32 | AMNB | AMB | Dimethylaniline monooxygenase [N-oxide-forming] OS=Sarcophilus harrisii OX=9305 GN=FMO3 PE=3 SV=1 |
| **G3WXN6** | 6 | 4 | 81 | 0.030884073 | 0.032590974 | Anova p-value <= 0.05 | 1.32 | AMNB | AMB | Histone H2A OS=Sarcophilus harrisii OX=9305 GN=H2AFV PE=3 SV=1 |
| **G3VA09** | 12 | 1 | 168 | 0.003841391 | 0.006789942 | Anova p-value <= 0.05 | 1.32 | AMNB | AMB | Histone H2B OS=Sarcophilus harrisii OX=9305 PE=3 SV=1 |
| **G3VHS2** | 13 | 7 | 157 | 0.010628125 | 0.014111546 | Anova p-value <= 0.05 | 1.32 | AMNB | AMB | Cofilin 1 OS=Sarcophilus harrisii OX=9305 GN=CFL1 PE=3 SV=1 |
| **G3WY45** | 3 | 2 | 34.6 | 0.837668467 | 0.411646474 |  | 1.31 | AMB | AMNB | DnaJ heat shock protein family (Hsp40) member C5 OS=Sarcophilus harrisii OX=9305 GN=DNAJC5 PE=4 SV=1 |
| **G3VXW8** | 6 | 3 | 37.8 | 0.009446391 | 0.013192845 | Anova p-value <= 0.05 | 1.31 | AMNB | AMB | DNA mismatch repair protein OS=Sarcophilus harrisii OX=9305 GN=MSH4 PE=3 SV=1 |
| **G3X033** | 14 | 10 | 92.8 | 0.000266444 | 0.001042662 | Anova p-value <= 0.05 | 1.31 | AMB | AMNB | Vesicle amine transport 1 like OS=Sarcophilus harrisii OX=9305 GN=VAT1L PE=4 SV=1 |
| **G3VKX9** | 23 | 20 | 170 | 0.015308084 | 0.018620675 | Anova p-value <= 0.05 | 1.31 | AMB | AMNB | Uncharacterized protein OS=Sarcophilus harrisii OX=9305 GN=STIP1 PE=4 SV=1 |
| **G3VK59** | 7 | 7 | 50.8 | 0.000697999 | 0.001935318 | Anova p-value <= 0.05 | 1.31 | AMB | AMNB | NADH:ubiquinone oxidoreductase core subunit V2 OS=Sarcophilus harrisii OX=9305 GN=NDUFV2 PE=4 SV=1 |
| **G3VMV9** | 6 | 3 | 37.4 | 0.015970013 | 0.019260164 | Anova p-value <= 0.05 | 1.31 | AMB | AMNB | Uncharacterized protein OS=Sarcophilus harrisii OX=9305 PE=4 SV=1 |
| **G3VTI9** | 40 | 23 | 457 | 0.006507471 | 0.010124351 | Anova p-value <= 0.05 | 1.31 | AMB | AMNB | Rab GDP dissociation inhibitor OS=Sarcophilus harrisii OX=9305 PE=3 SV=1 |
| **G3W8M8** | 3 | 2 | 20.1 | 0.274076242 | 0.174970658 |  | 1.31 | AMNB | AMB | Ras homolog family member G OS=Sarcophilus harrisii OX=9305 GN=RHOG PE=4 SV=1 |
| **G3W4E6** | 3 | 2 | 23.7 | 0.005651526 | 0.009079981 | Anova p-value <= 0.05 | 1.3 | AMNB | AMB | Alpha-carbonic anhydrase domain-containing protein OS=Sarcophilus harrisii OX=9305 GN=LOC100918259 PE=3 SV=1 |
| **G3WBE3** | 19 | 16 | 143 | 0.000553256 | 0.0016384 | Anova p-value <= 0.05 | 1.3 | AMNB | AMB | Uncharacterized protein OS=Sarcophilus harrisii OX=9305 GN=SLC25A3 PE=3 SV=1 |
| **G3WMZ4** | 8 | 7 | 53.5 | 0.000420718 | 0.001424957 | Anova p-value <= 0.05 | 1.3 | AMNB | AMB | V-type proton ATPase subunit a OS=Sarcophilus harrisii OX=9305 GN=ATP6V0A1 PE=3 SV=1 |
| **G3WI73** | 3 | 2 | 24 | 0.004667865 | 0.007902598 | Anova p-value <= 0.05 | 1.3 | AMB | AMNB | Uncharacterized protein OS=Sarcophilus harrisii OX=9305 GN=LRRC7 PE=4 SV=1 |
| **G3WII7** | 3 | 3 | 15.5 | 0.193169587 | 0.131798897 |  | 1.3 | AMB | AMNB | Protein arginine N-methyltransferase 5 OS=Sarcophilus harrisii OX=9305 GN=PRMT5 PE=3 SV=1 |
| **G3VAP7** | 1 | 1 | 6.34 | 0.096968811 | 0.079720715 |  | 1.3 | AMB | AMNB | CCHC-type domain-containing protein OS=Sarcophilus harrisii OX=9305 PE=4 SV=1 |
| **G3WZ75** | 4 | 3 | 22.4 | 0.096767532 | 0.079671039 |  | 1.3 | AMNB | AMB | Homer scaffold protein 2 OS=Sarcophilus harrisii OX=9305 GN=HOMER2 PE=4 SV=1 |
| **G3VU19** | 15 | 4 | 200 | 0.111793154 | 0.088810184 |  | 1.3 | AMNB | AMB | Histone H3 OS=Sarcophilus harrisii OX=9305 GN=H3F3A PE=3 SV=1 |
| **G3VTN7** | 2 | 1 | 11.6 | 0.000199744 | 0.000869076 | Anova p-value <= 0.05 | 1.3 | AMNB | AMB | Uncharacterized protein OS=Sarcophilus harrisii OX=9305 PE=3 SV=1 |
| **G3VAP9** | 11 | 8 | 69.5 | 0.001469143 | 0.003364299 | Anova p-value <= 0.05 | 1.3 | AMB | AMNB | Calbindin 2 OS=Sarcophilus harrisii OX=9305 GN=CALB2 PE=4 SV=1 |
| **G3VLE1** | 4 | 4 | 27.5 | 4.83E-05 | 0.000317693 | Anova p-value <= 0.05 | 1.3 | AMB | AMNB | Galectin OS=Sarcophilus harrisii OX=9305 GN=LGALS1 PE=4 SV=1 |
| **G3VCX9** | 5 | 1 | 41.5 | 2.46E-05 | 0.000193522 | Anova p-value <= 0.05 | 1.3 | AMB | AMNB | ADP ribosylation factor 6 OS=Sarcophilus harrisii OX=9305 GN=ARF6 PE=3 SV=1 |
| **G3WPL8** | 20 | 11 | 186 | 0.000537499 | 0.001608583 | Anova p-value <= 0.05 | 1.29 | AMB | AMNB | Vimentin OS=Sarcophilus harrisii OX=9305 GN=VIM PE=3 SV=1 |
| **G3WV99** | 3 | 1 | 24.5 | 0.123079993 | 0.095365691 |  | 1.29 | AMB | AMNB | Even-skipped homeobox 1 OS=Sarcophilus harrisii OX=9305 GN=EVX1 PE=4 SV=1 |
| **G3WJ65** | 5 | 5 | 57.9 | 0.008484625 | 0.012242613 | Anova p-value <= 0.05 | 1.29 | AMNB | AMB | ATP synthase peripheral stalk-membrane subunit b OS=Sarcophilus harrisii OX=9305 GN=ATP5PB PE=4 SV=1 |
| **G3W7E3** | 5 | 4 | 28 | 0.00142975 | 0.003314347 | Anova p-value <= 0.05 | 1.29 | AMB | AMNB | NADH:ubiquinone oxidoreductase subunit S4 OS=Sarcophilus harrisii OX=9305 GN=NDUFS4 PE=4 SV=1 |
| **G3WP17** | 4 | 3 | 22.4 | 0.000442693 | 0.00147751 | Anova p-value <= 0.05 | 1.29 | AMB | AMNB | Uncharacterized protein OS=Sarcophilus harrisii OX=9305 PE=4 SV=1 |
| **G3WER9** | 6 | 2 | 54.3 | 0.046142213 | 0.044423372 | Anova p-value <= 0.05 | 1.29 | AMB | AMNB | GLOBIN domain-containing protein OS=Sarcophilus harrisii OX=9305 PE=3 SV=1 |
| **G3WIQ8** | 16 | 9 | 154 | 0.000182969 | 0.00083316 | Anova p-value <= 0.05 | 1.29 | AMB | AMNB | Tubulin beta chain OS=Sarcophilus harrisii OX=9305 GN=TUBB1 PE=3 SV=1 |
| **G3WU80** | 7 | 3 | 51.9 | 0.006930189 | 0.010594267 | Anova p-value <= 0.05 | 1.29 | AMB | AMNB | VAMP associated protein B and C OS=Sarcophilus harrisii OX=9305 GN=VAPB PE=4 SV=1 |
| **G3W2Q1** | 3 | 1 | 21.7 | 0.91693335 | 0.436932758 |  | 1.29 | AMB | AMNB | Protein kinase C OS=Sarcophilus harrisii OX=9305 GN=PRKCG PE=3 SV=1 |
| **G3WBG9** | 19 | 14 | 228 | 0.006687642 | 0.010283782 | Anova p-value <= 0.05 | 1.29 | AMNB | AMB | t-SNARE coiled-coil homology domain-containing protein OS=Sarcophilus harrisii OX=9305 GN=STX1B PE=3 SV=1 |
| **G3WXV7** | 3 | 2 | 17.2 | 0.204138769 | 0.137623021 |  | 1.29 | AMB | AMNB | Uncharacterized protein OS=Sarcophilus harrisii OX=9305 GN=U2AF1 PE=4 SV=1 |
| **G3W210** | 2 | 1 | 12.1 | 0.012015958 | 0.015517145 | Anova p-value <= 0.05 | 1.28 | AMB | AMNB | Uncharacterized protein OS=Sarcophilus harrisii OX=9305 GN=ZBTB26 PE=4 SV=1 |
| **G3VV44** | 24 | 1 | 220 | 0.002039508 | 0.004194887 | Anova p-value <= 0.05 | 1.28 | AMNB | AMB | Septin-type G domain-containing protein OS=Sarcophilus harrisii OX=9305 GN=SEPT11 PE=3 SV=1 |
| **G3VV43** | 24 | 1 | 220 | 0.002039508 | 0.004194887 | Anova p-value <= 0.05 | 1.28 | AMNB | AMB | Septin-type G domain-containing protein OS=Sarcophilus harrisii OX=9305 GN=SEPT11 PE=3 SV=1 |
| **G3W0S8** | 11 | 4 | 82.7 | 0.000651283 | 0.001851162 | Anova p-value <= 0.05 | 1.28 | AMB | AMNB | G protein subunit alpha L OS=Sarcophilus harrisii OX=9305 GN=GNAL PE=4 SV=1 |
| **G3WZW0** | 7 | 6 | 60.6 | 0.005646228 | 0.009079981 | Anova p-value <= 0.05 | 1.28 | AMB | AMNB | NADH:ubiquinone oxidoreductase subunit S6 OS=Sarcophilus harrisii OX=9305 GN=NDUFS6 PE=4 SV=1 |
| **G3VLZ1** | 5 | 2 | 37.2 | 0.00031982 | 0.001183746 | Anova p-value <= 0.05 | 1.28 | AMNB | AMB | Microtubule-associated protein OS=Sarcophilus harrisii OX=9305 PE=4 SV=1 |
| **G3VX97** | 28 | 22 | 344 | 0.000125707 | 0.000643941 | Anova p-value <= 0.05 | 1.28 | AMB | AMNB | Uncharacterized protein OS=Sarcophilus harrisii OX=9305 GN=GNAO1 PE=4 SV=1 |
| **G3X3E8** | 72 | 59 | 652 | 0.003772333 | 0.00673098 | Anova p-value <= 0.05 | 1.28 | AMNB | AMB | Spectrin alpha_ non-erythrocytic 1 OS=Sarcophilus harrisii OX=9305 GN=SPTAN1 PE=4 SV=1 |
| **G3WKH0** | 3 | 3 | 17.2 | 0.001600282 | 0.003549636 | Anova p-value <= 0.05 | 1.28 | AMB | AMNB | Ribosomal_L2_C domain-containing protein OS=Sarcophilus harrisii OX=9305 GN=RPL8 PE=3 SV=1 |
| **G3WAL0** | 14 | 11 | 98.3 | 0.006607508 | 0.010236606 | Anova p-value <= 0.05 | 1.28 | AMB | AMNB | Actin-related protein 2/3 complex subunit OS=Sarcophilus harrisii OX=9305 GN=ARPC1A PE=3 SV=1 |
| **G3WJN1** | 5 | 2 | 63 | 0.007341832 | 0.011015156 | Anova p-value <= 0.05 | 1.28 | AMNB | AMB | Solute carrier family 25 member 31 OS=Sarcophilus harrisii OX=9305 GN=SLC25A31 PE=3 SV=1 |
| **G3W3W5** | 5 | 3 | 34.8 | 0.002270177 | 0.004569629 | Anova p-value <= 0.05 | 1.28 | AMB | AMNB | MSP domain-containing protein OS=Sarcophilus harrisii OX=9305 GN=VAPA PE=4 SV=1 |
| **G3WJ27** | 4 | 1 | 31.2 | 0.007706886 | 0.01141151 | Anova p-value <= 0.05 | 1.28 | AMB | AMNB | AP complex subunit beta OS=Sarcophilus harrisii OX=9305 GN=AP4B1 PE=3 SV=1 |
| **G3WQJ8** | 2 | 1 | 9.22 | 0.589209544 | 0.313253321 |  | 1.28 | AMNB | AMB | Calcium-transporting ATPase OS=Sarcophilus harrisii OX=9305 GN=ATP2A2 PE=3 SV=1 |
| **G3WTX9** | 2 | 1 | 12.5 | 0.006515399 | 0.010124351 | Anova p-value <= 0.05 | 1.28 | AMB | AMNB | Pyruvate dehyrogenase phosphatase catalytic subunit 1 OS=Sarcophilus harrisii OX=9305 GN=PDP1 PE=3 SV=1 |
| **G3VKH7** | 2 | 1 | 10.9 | 5.70E-06 | 6.72E-05 | Anova p-value <= 0.05 | 1.28 | AMB | AMNB | Alpha-carbonic anhydrase domain-containing protein OS=Sarcophilus harrisii OX=9305 GN=CA7 PE=3 SV=1 |
| **G3VC30** | 20 | 5 | 272 | 0.288044991 | 0.181461859 |  | 1.28 | AMNB | AMB | Pyruvate kinase OS=Sarcophilus harrisii OX=9305 PE=3 SV=1 |
| **G3VJU7** | 2 | 2 | 15.7 | 0.00270451 | 0.005048629 | Anova p-value <= 0.05 | 1.27 | AMNB | AMB | Glutathione S-transferase pi 1 OS=Sarcophilus harrisii OX=9305 GN=GSTP1 PE=3 SV=1 |
| **G3VS66** | 2 | 1 | 11.4 | 0.074653651 | 0.065568122 |  | 1.27 | AMNB | AMB | Uncharacterized protein OS=Sarcophilus harrisii OX=9305 PE=4 SV=1 |
| **G3VRP1** | 3 | 2 | 20.8 | 0.00155614 | 0.003512121 | Anova p-value <= 0.05 | 1.27 | AMB | AMNB | Uncharacterized protein OS=Sarcophilus harrisii OX=9305 GN=LINS1 PE=4 SV=1 |
| **G3WED5** | 1 | 1 | 7.23 | 0.042890506 | 0.04204486 | Anova p-value <= 0.05 | 1.27 | AMNB | AMB | Small nuclear ribonucleoprotein Sm D1 OS=Sarcophilus harrisii OX=9305 GN=SNRPD1 PE=3 SV=1 |
| **G3X1X5** | 39 | 29 | 379 | 0.002485809 | 0.004870003 | Anova p-value <= 0.05 | 1.27 | AMB | AMNB | IF rod domain-containing protein OS=Sarcophilus harrisii OX=9305 GN=INA PE=3 SV=1 |
| **G3VS00** | 5 | 3 | 34.3 | 0.065926518 | 0.059002527 |  | 1.27 | AMB | AMNB | Dynein light chain OS=Sarcophilus harrisii OX=9305 GN=DYNLL2 PE=3 SV=1 |
| **G3VYK3** | 10 | 2 | 90 | 0.313144146 | 0.192733116 |  | 1.27 | AMNB | AMB | RAB3D_ member RAS oncogene family OS=Sarcophilus harrisii OX=9305 GN=RAB3D PE=4 SV=1 |
| **G3WIR9** | 4 | 2 | 22 | 0.044477518 | 0.043090731 | Anova p-value <= 0.05 | 1.27 | AMB | AMNB | Inhibitor of growth protein OS=Sarcophilus harrisii OX=9305 GN=ING3 PE=3 SV=1 |
| **G3WPG3** | 2 | 1 | 12 | 0.017787253 | 0.021007848 | Anova p-value <= 0.05 | 1.27 | AMB | AMNB | Proteasome subunit beta OS=Sarcophilus harrisii OX=9305 GN=PSMB4 PE=3 SV=1 |
| **G3WA60** | 5 | 2 | 34.7 | 0.000580331 | 0.001692004 | Anova p-value <= 0.05 | 1.27 | AMNB | AMB | Serine/threonine-protein phosphatase 2A 55 kDa regulatory subunit B OS=Sarcophilus harrisii OX=9305 GN=PPP2R2B PE=3 SV=1 |
| **G3X2J3** | 5 | 1 | 21.1 | 0.048628312 | 0.046305257 | Anova p-value <= 0.05 | 1.27 | AMNB | AMB | Uncharacterized protein OS=Sarcophilus harrisii OX=9305 PE=4 SV=1 |
| **G3VAQ0** | 8 | 7 | 67.2 | 0.015805387 | 0.019102352 | Anova p-value <= 0.05 | 1.27 | AMB | AMNB | Actin-related protein 2 OS=Sarcophilus harrisii OX=9305 GN=ACTR2 PE=3 SV=1 |
| **G3X0E4** | 2 | 2 | 13.1 | 0.017475159 | 0.020825169 | Anova p-value <= 0.05 | 1.27 | AMB | AMNB | Protein kinase domain-containing protein OS=Sarcophilus harrisii OX=9305 GN=CAMKV PE=4 SV=1 |
| **G3WGG5** | 10 | 4 | 81 | 0.111953545 | 0.088812864 |  | 1.27 | AMB | AMNB | Uncharacterized protein OS=Sarcophilus harrisii OX=9305 GN=HPCA PE=4 SV=1 |
| **G3VD92** | 1 | 1 | 5.81 | 0.015130718 | 0.018484432 | Anova p-value <= 0.05 | 1.27 | AMB | AMNB | KHA domain-containing protein OS=Sarcophilus harrisii OX=9305 GN=KCTD9 PE=4 SV=1 |
| **G3VKG7** | 1 | 1 | 11.9 | 0.078436165 | 0.068045015 |  | 1.27 | AMNB | AMB | Uncharacterized protein OS=Sarcophilus harrisii OX=9305 PE=4 SV=1 |
| **G3VE83** | 19 | 12 | 123 | 0.228343368 | 0.150707594 |  | 1.27 | AMNB | AMB | HATPase_c domain-containing protein OS=Sarcophilus harrisii OX=9305 GN=HSP90B1 PE=3 SV=1 |
| **G3W9B8** | 3 | 1 | 18 | 0.282097792 | 0.178679934 |  | 1.26 | AMNB | AMB | Sorting nexin 16 OS=Sarcophilus harrisii OX=9305 GN=SNX16 PE=4 SV=1 |
| **G3WLK9** | 4 | 3 | 22.1 | 0.000267291 | 0.001042662 | Anova p-value <= 0.05 | 1.26 | AMB | AMNB | Solute carrier family 25 member 20 OS=Sarcophilus harrisii OX=9305 GN=SLC25A20 PE=3 SV=1 |
| **G3WQ04** | 10 | 3 | 90.7 | 0.000117569 | 0.000615741 | Anova p-value <= 0.05 | 1.26 | AMB | AMNB | IF rod domain-containing protein OS=Sarcophilus harrisii OX=9305 GN=LOC100932812 PE=3 SV=1 |
| **G3WZE2** | 8 | 6 | 46 | 3.00E-05 | 0.000226552 | Anova p-value <= 0.05 | 1.26 | AMB | AMNB | Asp_Glu_race_2 domain-containing protein OS=Sarcophilus harrisii OX=9305 GN=TOPAZ1 PE=4 SV=1 |
| **G3WQQ3** | 13 | 9 | 73.4 | 0.013911658 | 0.017542498 | Anova p-value <= 0.05 | 1.26 | AMB | AMNB | Uncharacterized protein OS=Sarcophilus harrisii OX=9305 PE=4 SV=1 |
| **G3VZQ1** | 55 | 32 | 653 | 6.10E-05 | 0.000383295 | Anova p-value <= 0.05 | 1.26 | AMNB | AMB | Uncharacterized protein OS=Sarcophilus harrisii OX=9305 PE=3 SV=1 |
| **G3WAK9** | 40 | 34 | 425 | 0.000203528 | 0.000878782 | Anova p-value <= 0.05 | 1.26 | AMB | AMNB | Fructose-bisphosphate aldolase OS=Sarcophilus harrisii OX=9305 PE=3 SV=1 |
| **G3VBZ1** | 8 | 8 | 63.3 | 3.53E-05 | 0.000255974 | Anova p-value <= 0.05 | 1.26 | AMB | AMNB | Uncharacterized protein OS=Sarcophilus harrisii OX=9305 PE=4 SV=1 |
| **G3VVF4** | 6 | 6 | 47.2 | 0.05040004 | 0.047751179 |  | 1.26 | AMB | AMNB | Uncharacterized protein OS=Sarcophilus harrisii OX=9305 GN=CSRP1 PE=4 SV=1 |
| **G3VD89** | 1 | 1 | 7.44 | 0.054711543 | 0.050400883 |  | 1.26 | AMNB | AMB | Uncharacterized protein OS=Sarcophilus harrisii OX=9305 PE=4 SV=1 |
| **G3X3S6** | 7 | 6 | 41.5 | 0.100271127 | 0.081407329 |  | 1.26 | AMNB | AMB | SH3 domain containing GRB2 like_ endophilin B2 OS=Sarcophilus harrisii OX=9305 GN=SH3GLB2 PE=4 SV=1 |
| **G3VFD0** | 9 | 7 | 62.2 | 0.007148152 | 0.010839581 | Anova p-value <= 0.05 | 1.26 | AMB | AMNB | Protein kinase C and casein kinase substrate in neurons 2 OS=Sarcophilus harrisii OX=9305 GN=PACSIN2 PE=4 SV=1 |
| **G3W824** | 12 | 7 | 85.9 | 0.001458112 | 0.003352611 | Anova p-value <= 0.05 | 1.26 | AMNB | AMB | Protein activator of interferon induced protein kinase EIF2AK2 OS=Sarcophilus harrisii OX=9305 GN=PRKRA PE=4 SV=1 |
| **G3W991** | 10 | 6 | 73.8 | 0.00037204 | 0.00129898 | Anova p-value <= 0.05 | 1.25 | AMB | AMNB | Phosphatidylinositol-5-phosphate 4-kinase type 2 alpha OS=Sarcophilus harrisii OX=9305 GN=PIP4K2A PE=4 SV=1 |
| **G3X3P0** | 6 | 5 | 57.1 | 8.19E-05 | 0.000478292 | Anova p-value <= 0.05 | 1.25 | AMB | AMNB | Profilin OS=Sarcophilus harrisii OX=9305 GN=PFN2 PE=3 SV=1 |
| **G3VN68** | 4 | 2 | 20.4 | 0.257399809 | 0.165633013 |  | 1.25 | AMNB | AMB | CUE domain-containing protein OS=Sarcophilus harrisii OX=9305 PE=4 SV=1 |
| **G3WFU4** | 6 | 5 | 36.6 | 0.002890184 | 0.00530765 | Anova p-value <= 0.05 | 1.25 | AMB | AMNB | Aldedh domain-containing protein OS=Sarcophilus harrisii OX=9305 GN=ALDH1A2 PE=3 SV=1 |
| **G3VL92** | 7 | 7 | 51.4 | 0.000939964 | 0.002427697 | Anova p-value <= 0.05 | 1.25 | AMNB | AMB | MFS domain-containing protein OS=Sarcophilus harrisii OX=9305 GN=SV2A PE=4 SV=1 |
| **G3WWH2** | 9 | 8 | 69 | 0.000223739 | 0.00092153 | Anova p-value <= 0.05 | 1.25 | AMNB | AMB | Uncharacterized protein OS=Sarcophilus harrisii OX=9305 GN=RAB7A PE=4 SV=1 |
| **G3X0C1** | 4 | 3 | 23.5 | 0.052713127 | 0.049445756 |  | 1.25 | AMNB | AMB | Uncharacterized protein OS=Sarcophilus harrisii OX=9305 GN=CBX3 PE=4 SV=1 |
| **G3VTG1** | 20 | 12 | 174 | 0.000341637 | 0.001223776 | Anova p-value <= 0.05 | 1.25 | AMB | AMNB | NADH dehydrogenase [ubiquinone] flavoprotein 1_ mitochondrial OS=Sarcophilus harrisii OX=9305 GN=NDUFV1 PE=3 SV=1 |
| **G3X2C1** | 6 | 2 | 48.6 | 0.03208837 | 0.033548874 | Anova p-value <= 0.05 | 1.25 | AMNB | AMB | Uncharacterized protein OS=Sarcophilus harrisii OX=9305 GN=GNAT1 PE=4 SV=1 |
| **G3VVY2** | 2 | 2 | 22.8 | 0.040824773 | 0.04036968 | Anova p-value <= 0.05 | 1.25 | AMNB | AMB | Uncharacterized protein OS=Sarcophilus harrisii OX=9305 GN=RAB23 PE=4 SV=1 |
| **G3X2V2** | 10 | 3 | 84.2 | 0.104976676 | 0.084342742 |  | 1.25 | AMB | AMNB | G protein subunit alpha i2 OS=Sarcophilus harrisii OX=9305 GN=GNAI2 PE=4 SV=1 |
| **G3WYY4** | 26 | 24 | 261 | 0.002839173 | 0.005248051 | Anova p-value <= 0.05 | 1.25 | AMNB | AMB | Uncharacterized protein OS=Sarcophilus harrisii OX=9305 GN=VDAC1 PE=4 SV=1 |
| **G3VZF3** | 2 | 1 | 16.7 | 0.001198698 | 0.002860809 | Anova p-value <= 0.05 | 1.25 | AMB | AMNB | G3BP stress granule assembly factor 2 OS=Sarcophilus harrisii OX=9305 GN=G3BP2 PE=4 SV=1 |
| **G3WPS8** | 6 | 4 | 42.7 | 0.000414199 | 0.001419884 | Anova p-value <= 0.05 | 1.25 | AMB | AMNB | Condensin complex subunit 1 OS=Sarcophilus harrisii OX=9305 GN=NCAPD2 PE=3 SV=1 |
| **G3VFK4** | 5 | 2 | 50.2 | 0.000191714 | 0.000847171 | Anova p-value <= 0.05 | 1.25 | AMB | AMNB | Tr-type G domain-containing protein OS=Sarcophilus harrisii OX=9305 PE=4 SV=1 |
| **G3VVU0** | 11 | 3 | 99.8 | 0.144042411 | 0.107061489 |  | 1.25 | AMB | AMNB | Uncharacterized protein OS=Sarcophilus harrisii OX=9305 GN=GNAI1 PE=4 SV=1 |
| **G3VL67** | 22 | 17 | 242 | 0.019641621 | 0.022812659 | Anova p-value <= 0.05 | 1.24 | AMNB | AMB | Amino acid transporter OS=Sarcophilus harrisii OX=9305 GN=SLC1A2 PE=3 SV=1 |
| **G3VS99** | 42 | 23 | 354 | 8.07E-05 | 0.000478292 | Anova p-value <= 0.05 | 1.24 | AMB | AMNB | AP complex subunit beta OS=Sarcophilus harrisii OX=9305 GN=AP2B1 PE=3 SV=1 |
| **G3VH53** | 3 | 1 | 35 | 0.000757953 | 0.002071091 | Anova p-value <= 0.05 | 1.24 | AMB | AMNB | Small ubiquitin-related modifier OS=Sarcophilus harrisii OX=9305 PE=3 SV=1 |
| **G3VMB6** | 2 | 2 | 8.97 | 0.229304055 | 0.150989284 |  | 1.24 | AMNB | AMB | Uncharacterized protein OS=Sarcophilus harrisii OX=9305 PE=4 SV=1 |
| **G3WEZ8** | 10 | 7 | 69.7 | 0.051782125 | 0.048896818 |  | 1.24 | AMNB | AMB | Uncharacterized protein OS=Sarcophilus harrisii OX=9305 PE=4 SV=1 |
| **G3WQA1** | 3 | 2 | 14.8 | 0.357080391 | 0.213875494 |  | 1.24 | AMB | AMNB | Glutamate ionotropic receptor AMPA type subunit 3 OS=Sarcophilus harrisii OX=9305 GN=GRIA3 PE=3 SV=1 |
| **G3W3A4** | 15 | 10 | 106 | 0.167191691 | 0.118803484 |  | 1.24 | AMNB | AMB | T-complex protein 1 subunit delta OS=Sarcophilus harrisii OX=9305 GN=CCT4 PE=3 SV=1 |
| **G3WX59** | 48 | 21 | 549 | 0.000167384 | 0.00078897 | Anova p-value <= 0.05 | 1.24 | AMNB | AMB | Sodium/potassium-transporting ATPase subunit alpha OS=Sarcophilus harrisii OX=9305 GN=ATP1A1 PE=3 SV=1 |
| **G3WHC2** | 6 | 3 | 51 | 0.018186385 | 0.021387072 | Anova p-value <= 0.05 | 1.24 | AMB | AMNB | 14_3_3 domain-containing protein OS=Sarcophilus harrisii OX=9305 PE=3 SV=1 |
| **Q0QF48** | 22 | 1 | 311 | 0.012737629 | 0.016337198 | Anova p-value <= 0.05 | 1.24 | AMB | AMNB | Malate dehydrogenase (Fragment) OS=Sminthopsis douglasi OX=90758 GN=MDH2 PE=2 SV=1 |
| **G3VCQ8** | 15 | 9 | 98.9 | 0.002345186 | 0.00465436 | Anova p-value <= 0.05 | 1.24 | AMB | AMNB | ATP-citrate synthase OS=Sarcophilus harrisii OX=9305 GN=ACLY PE=3 SV=1 |
| **G3WFU1** | 31 | 1 | 218 | 0.168621262 | 0.119480387 |  | 1.24 | AMNB | AMB | Uncharacterized protein OS=Sarcophilus harrisii OX=9305 GN=ACTN1 PE=4 SV=1 |
| **G3WDE4** | 5 | 4 | 37.8 | 0.054423551 | 0.050299424 |  | 1.24 | AMNB | AMB | Uncharacterized protein OS=Sarcophilus harrisii OX=9305 GN=RAP1B PE=4 SV=1 |
| **G3W0V1** | 12 | 1 | 130 | 0.037209064 | 0.037448979 | Anova p-value <= 0.05 | 1.24 | AMB | AMNB | Mitogen-activated protein kinase OS=Sarcophilus harrisii OX=9305 PE=4 SV=1 |
| **G3VV55** | 2 | 2 | 10.7 | 0.017402494 | 0.020810279 | Anova p-value <= 0.05 | 1.24 | AMB | AMNB | DNA ligase OS=Sarcophilus harrisii OX=9305 GN=LIG3 PE=3 SV=1 |
| **O46450** | 3 | 1 | 25.3 | 0.013235103 | 0.016822668 | Anova p-value <= 0.05 | 1.24 | AMB | AMNB | Phosphoglycerate kinase (Fragment) OS=Antechinus leo OX=65606 GN=PGK-1 PE=3 SV=1 |
| **G3WFH4** | 4 | 3 | 30.7 | 0.034427583 | 0.035321817 | Anova p-value <= 0.05 | 1.23 | AMNB | AMB | Elongation factor Tu OS=Sarcophilus harrisii OX=9305 GN=TUFM PE=3 SV=1 |
| **G3VM34** | 7 | 4 | 40.3 | 0.026793721 | 0.029294326 | Anova p-value <= 0.05 | 1.23 | AMB | AMNB | Rho guanine nucleotide exchange factor 40 OS=Sarcophilus harrisii OX=9305 GN=ARHGEF40 PE=4 SV=1 |
| **G3VKQ8** | 5 | 5 | 45.7 | 0.043096203 | 0.042173411 | Anova p-value <= 0.05 | 1.23 | AMNB | AMB | FABP domain-containing protein OS=Sarcophilus harrisii OX=9305 GN=FABP7 PE=3 SV=1 |
| **G3WI49** | 31 | 29 | 271 | 0.002630197 | 0.004989268 | Anova p-value <= 0.05 | 1.23 | AMNB | AMB | Uncharacterized protein OS=Sarcophilus harrisii OX=9305 GN=PLP1 PE=4 SV=1 |
| **G3WA14** | 37 | 22 | 346 | 0.000620328 | 0.001781076 | Anova p-value <= 0.05 | 1.23 | AMB | AMNB | Vacuolar proton pump subunit B OS=Sarcophilus harrisii OX=9305 GN=ATP6V1B2 PE=3 SV=1 |
| **G3W195** | 17 | 15 | 133 | 0.000360236 | 0.001281497 | Anova p-value <= 0.05 | 1.23 | AMB | AMNB | Hypoxanthine phosphoribosyltransferase OS=Sarcophilus harrisii OX=9305 GN=HPRT1 PE=3 SV=1 |
| **G3WY83** | 2 | 2 | 13.5 | 0.96005633 | 0.451772513 |  | 1.23 | AMNB | AMB | Uncharacterized protein OS=Sarcophilus harrisii OX=9305 GN=RPS15A PE=3 SV=1 |
| **G3VET1** | 3 | 2 | 15 | 0.064269718 | 0.057702336 |  | 1.23 | AMB | AMNB | SAMM50 sorting and assembly machinery component OS=Sarcophilus harrisii OX=9305 GN=SAMM50 PE=4 SV=1 |
| **G3VZ23** | 6 | 2 | 34.1 | 3.98E-05 | 0.000278241 | Anova p-value <= 0.05 | 1.23 | AMB | AMNB | Zinc finger FYVE domain-containing protein OS=Sarcophilus harrisii OX=9305 GN=ZFYVE9 PE=4 SV=1 |
| **G3VSZ8** | 2 | 2 | 12.1 | 0.380406361 | 0.223472064 |  | 1.23 | AMB | AMNB | Uncharacterized protein OS=Sarcophilus harrisii OX=9305 GN=CCDC177 PE=4 SV=1 |
| **G3WNM6** | 24 | 16 | 184 | 1.60E-05 | 0.000134846 | Anova p-value <= 0.05 | 1.23 | AMB | AMNB | Protein disulfide-isomerase OS=Sarcophilus harrisii OX=9305 GN=PDIA3 PE=3 SV=1 |
| **G3WXL4** | 18 | 1 | 166 | 0.072852774 | 0.064285884 |  | 1.23 | AMNB | AMB | Uncharacterized protein OS=Sarcophilus harrisii OX=9305 GN=HNRNPK PE=4 SV=1 |
| **G3VBX9** | 3 | 3 | 27 | 0.000975331 | 0.002462814 | Anova p-value <= 0.05 | 1.23 | AMB | AMNB | Uncharacterized protein OS=Sarcophilus harrisii OX=9305 PE=4 SV=1 |
| **G3X253** | 1 | 1 | 5.6 | 0.023822903 | 0.026525191 | Anova p-value <= 0.05 | 1.23 | AMNB | AMB | Uncharacterized protein OS=Sarcophilus harrisii OX=9305 PE=4 SV=1 |
| **G3WIC4** | 1 | 1 | 4.12 | 0.090793072 | 0.07585629 |  | 1.23 | AMNB | AMB | FABP domain-containing protein OS=Sarcophilus harrisii OX=9305 PE=3 SV=1 |
| **G3WLI4** | 3 | 1 | 21.5 | 0.182445768 | 0.126310453 |  | 1.23 | AMB | AMNB | Gp_dh_N domain-containing protein OS=Sarcophilus harrisii OX=9305 PE=4 SV=1 |
| **G3W914** | 17 | 5 | 155 | 0.003210861 | 0.005802361 | Anova p-value <= 0.05 | 1.23 | AMB | AMNB | RAB3A_ member RAS oncogene family OS=Sarcophilus harrisii OX=9305 GN=RAB3A PE=4 SV=1 |
| **G3VLM4** | 6 | 1 | 53.3 | 0.02732746 | 0.029668057 | Anova p-value <= 0.05 | 1.23 | AMB | AMNB | RAB1A_ member RAS oncogene family OS=Sarcophilus harrisii OX=9305 GN=RAB1A PE=4 SV=1 |
| **P52900** | 26 | 4 | 237 | 0.001446503 | 0.003339495 | Anova p-value <= 0.05 | 1.23 | AMB | AMNB | Pyruvate dehydrogenase E1 component subunit alpha_ mitochondrial (Fragment) OS=Sminthopsis macroura OX=9302 GN=PDHA PE=2 SV=1 |
| **G3WWJ0** | 3 | 3 | 35.4 | 0.027906427 | 0.030123159 | Anova p-value <= 0.05 | 1.23 | AMB | AMNB | Myelin protein zero OS=Sarcophilus harrisii OX=9305 GN=MPZ PE=4 SV=1 |
| **G3X0L3** | 5 | 1 | 30.8 | 0.1834556 | 0.126854309 |  | 1.22 | AMB | AMNB | Uncharacterized protein OS=Sarcophilus harrisii OX=9305 GN=PRKACB PE=3 SV=1 |
| **G3X0Z2** | 9 | 6 | 50.4 | 0.006690724 | 0.010283782 | Anova p-value <= 0.05 | 1.22 | AMNB | AMB | Myosin heavy chain 7B OS=Sarcophilus harrisii OX=9305 GN=MYH7B PE=3 SV=1 |
| **G3W9K3** | 8 | 3 | 62.5 | 0.354649013 | 0.212723083 |  | 1.22 | AMB | AMNB | RAB1B_ member RAS oncogene family OS=Sarcophilus harrisii OX=9305 GN=RAB1B PE=4 SV=1 |
| **G3WP64** | 9 | 8 | 61.4 | 0.000964559 | 0.002462814 | Anova p-value <= 0.05 | 1.22 | AMB | AMNB | Obg-like ATPase 1 OS=Sarcophilus harrisii OX=9305 GN=OLA1 PE=3 SV=1 |
| **G3W629** | 5 | 3 | 28.3 | 0.096747453 | 0.079671039 |  | 1.22 | AMB | AMNB | SUMO specific peptidase 7 OS=Sarcophilus harrisii OX=9305 GN=SENP7 PE=4 SV=1 |
| **G3WDF1** | 20 | 4 | 123 | 0.000185597 | 0.00083316 | Anova p-value <= 0.05 | 1.22 | AMB | AMNB | Neurofascin OS=Sarcophilus harrisii OX=9305 GN=NFASC PE=4 SV=1 |
| **G3VIT0** | 6 | 4 | 86.2 | 0.008164887 | 0.011902714 | Anova p-value <= 0.05 | 1.22 | AMB | AMNB | Histone H2A OS=Sarcophilus harrisii OX=9305 GN=LOC100914215 PE=3 SV=1 |
| **G3VZ94** | 2 | 1 | 10.5 | 0.776811945 | 0.390562848 |  | 1.22 | AMNB | AMB | Poly(rC) binding protein 4 OS=Sarcophilus harrisii OX=9305 GN=PCBP4 PE=4 SV=1 |
| **G3W1N0** | 1 | 1 | 4.76 | 0.022544457 | 0.025484454 | Anova p-value <= 0.05 | 1.22 | AMB | AMNB | Protein kinase cAMP-dependent type I regulatory subunit alpha OS=Sarcophilus harrisii OX=9305 GN=PRKAR1A PE=4 SV=1 |
| **G3W0K8** | 17 | 5 | 163 | 0.003096695 | 0.005650207 | Anova p-value <= 0.05 | 1.22 | AMB | AMNB | Calcium/calmodulin dependent protein kinase II gamma OS=Sarcophilus harrisii OX=9305 GN=CAMK2G PE=4 SV=1 |
| **G3VCZ3** | 3 | 2 | 26.3 | 0.0819919 | 0.069846624 |  | 1.22 | AMB | AMNB | RRM domain-containing protein OS=Sarcophilus harrisii OX=9305 PE=4 SV=1 |
| **G3WDF2** | 16 | 1 | 101 | 0.00026393 | 0.001042662 | Anova p-value <= 0.05 | 1.22 | AMB | AMNB | Neurofascin OS=Sarcophilus harrisii OX=9305 GN=NFASC PE=4 SV=1 |
| **G3W035** | 4 | 2 | 32.5 | 0.00048951 | 0.00152131 | Anova p-value <= 0.05 | 1.22 | AMB | AMNB | Sulfite oxidase OS=Sarcophilus harrisii OX=9305 GN=SUOX PE=4 SV=1 |
| **G3W112** | 2 | 1 | 12.7 | 0.081091675 | 0.069496013 |  | 1.22 | AMB | AMNB | Diacylglycerol kinase OS=Sarcophilus harrisii OX=9305 PE=3 SV=1 |
| **G3VTU6** | 16 | 15 | 155 | 0.000929994 | 0.002412967 | Anova p-value <= 0.05 | 1.22 | AMB | AMNB | F-actin-capping protein subunit beta OS=Sarcophilus harrisii OX=9305 GN=CAPZB PE=3 SV=1 |
| **G3WZU8** | 14 | 13 | 139 | 0.009086243 | 0.012833299 | Anova p-value <= 0.05 | 1.22 | AMB | AMNB | Heat shock protein family E (Hsp10) member 1 OS=Sarcophilus harrisii OX=9305 GN=HSPE1 PE=3 SV=1 |
| **G3WHB8** | 15 | 5 | 134 | 0.007699097 | 0.01141151 | Anova p-value <= 0.05 | 1.22 | AMB | AMNB | IF rod domain-containing protein OS=Sarcophilus harrisii OX=9305 GN=DES PE=3 SV=1 |
| **G3WQW3** | 5 | 5 | 42.6 | 0.005476156 | 0.00892635 | Anova p-value <= 0.05 | 1.22 | AMB | AMNB | Uncharacterized protein OS=Sarcophilus harrisii OX=9305 PE=3 SV=1 |
| **G3VGZ4** | 1 | 1 | 13 | 0.046789702 | 0.044629615 | Anova p-value <= 0.05 | 1.22 | AMNB | AMB | Lipocalin 15 OS=Sarcophilus harrisii OX=9305 GN=LCN15 PE=3 SV=1 |
| **G3X1N3** | 7 | 3 | 43.3 | 0.063349306 | 0.057148111 |  | 1.22 | AMB | AMNB | Uncharacterized protein OS=Sarcophilus harrisii OX=9305 GN=HPCAL4 PE=4 SV=1 |
| **G3VWD7** | 1 | 1 | 12 | 0.039311326 | 0.039042219 | Anova p-value <= 0.05 | 1.22 | AMB | AMNB | Cytotoxic and regulatory T cell molecule OS=Sarcophilus harrisii OX=9305 GN=CRTAM PE=4 SV=1 |
| **G3WW47** | 4 | 2 | 28.7 | 0.089376283 | 0.074893836 |  | 1.22 | AMNB | AMB | FIP-RBD domain-containing protein OS=Sarcophilus harrisii OX=9305 GN=RAB11FIP1 PE=4 SV=1 |
| **G3WU02** | 3 | 1 | 22.1 | 0.448942404 | 0.254696528 |  | 1.21 | AMB | AMNB | S1 motif domain-containing protein OS=Sarcophilus harrisii OX=9305 GN=EXOSC2 PE=4 SV=1 |
| **G3WIK3** | 4 | 2 | 23.3 | 0.006512072 | 0.010124351 | Anova p-value <= 0.05 | 1.21 | AMNB | AMB | Uncharacterized protein OS=Sarcophilus harrisii OX=9305 GN=EHD3 PE=3 SV=1 |
| **G3WA07** | 1 | 1 | 5.81 | 0.369694606 | 0.219190787 |  | 1.21 | AMNB | AMB | Uncharacterized protein OS=Sarcophilus harrisii OX=9305 PE=4 SV=1 |
| **G3WZ98** | 1 | 1 | 5.44 | 0.035728189 | 0.036281343 | Anova p-value <= 0.05 | 1.21 | AMB | AMNB | Uncharacterized protein OS=Sarcophilus harrisii OX=9305 PE=4 SV=1 |
| **G3WNC7** | 3 | 2 | 16.9 | 0.230708895 | 0.151737682 |  | 1.21 | AMB | AMNB | Uncharacterized protein OS=Sarcophilus harrisii OX=9305 GN=CRYBB1 PE=3 SV=1 |
| **G3VRH8** | 10 | 5 | 74.8 | 9.19E-05 | 0.00050944 | Anova p-value <= 0.05 | 1.21 | AMB | AMNB | IF rod domain-containing protein OS=Sarcophilus harrisii OX=9305 GN=KRT79 PE=3 SV=1 |
| **G3WQE5** | 3 | 2 | 17.6 | 0.286283352 | 0.180723921 |  | 1.21 | AMB | AMNB | PC4 domain-containing protein OS=Sarcophilus harrisii OX=9305 GN=SUB1 PE=4 SV=1 |
| **G3VR82** | 2 | 2 | 10.6 | 0.073353445 | 0.064626858 |  | 1.21 | AMNB | AMB | Uncharacterized protein OS=Sarcophilus harrisii OX=9305 PE=4 SV=1 |
| **G3VUP5** | 1 | 1 | 5.34 | 0.26584263 | 0.170290915 |  | 1.21 | AMB | AMNB | S5A_REDUCTASE domain-containing protein OS=Sarcophilus harrisii OX=9305 PE=4 SV=1 |
| **G3VCK6** | 1 | 1 | 5.5 | 0.240565628 | 0.157124258 |  | 1.21 | AMB | AMNB | Aspartate dehydrogenase domain containing OS=Sarcophilus harrisii OX=9305 GN=ASPDH PE=4 SV=1 |
| **G3WZZ3** | 1 | 1 | 14.1 | 0.221480086 | 0.14703565 |  | 1.21 | AMNB | AMB | Ubiquinol-cytochrome c reductase_ Rieske iron-sulfur polypeptide 1 OS=Sarcophilus harrisii OX=9305 GN=UQCRFS1 PE=4 SV=1 |
| **G3WR88** | 10 | 10 | 98.3 | 0.00041122 | 0.001418268 | Anova p-value <= 0.05 | 1.21 | AMB | AMNB | Annexin OS=Sarcophilus harrisii OX=9305 GN=ANXA2 PE=3 SV=1 |
| **G3WWF9** | 1 | 1 | 4.39 | 0.052224071 | 0.049150032 |  | 1.21 | AMB | AMNB | Uncharacterized protein OS=Sarcophilus harrisii OX=9305 GN=GCLC PE=4 SV=1 |
| **G3VNJ5** | 2 | 1 | 13.6 | 0.000991487 | 0.002481454 | Anova p-value <= 0.05 | 1.21 | AMB | AMNB | Guanine nucleotide-binding protein subunit gamma OS=Sarcophilus harrisii OX=9305 GN=GNGT1 PE=3 SV=1 |
| **G3W7E4** | 2 | 2 | 18.7 | 0.532666435 | 0.291381751 |  | 1.21 | AMB | AMNB | Uncharacterized protein OS=Sarcophilus harrisii OX=9305 GN=CCDC189 PE=4 SV=1 |
| **G3VGM0** | 28 | 12 | 190 | 0.022662915 | 0.025484454 | Anova p-value <= 0.05 | 1.21 | AMB | AMNB | AP complex subunit beta OS=Sarcophilus harrisii OX=9305 GN=AP1B1 PE=3 SV=1 |
| **G3W448** | 3 | 2 | 26.7 | 0.473401621 | 0.26617013 |  | 1.21 | AMB | AMNB | Uncharacterized protein OS=Sarcophilus harrisii OX=9305 GN=ZNFX1 PE=4 SV=1 |
| **G3W5V9** | 2 | 1 | 10.6 | 0.40456844 | 0.233503547 |  | 1.21 | AMB | AMNB | AIG1-type G domain-containing protein OS=Sarcophilus harrisii OX=9305 PE=4 SV=1 |
| **G3WA62** | 3 | 2 | 16.4 | 9.13E-05 | 0.00050944 | Anova p-value <= 0.05 | 1.21 | AMB | AMNB | t-SNARE coiled-coil homology domain-containing protein OS=Sarcophilus harrisii OX=9305 PE=4 SV=1 |
| **G3WIY3** | 2 | 1 | 10.2 | 0.893288943 | 0.428917952 |  | 1.21 | AMB | AMNB | Aristaless related homeobox OS=Sarcophilus harrisii OX=9305 GN=ARX PE=3 SV=1 |
| **G3WHX2** | 2 | 2 | 13.9 | 0.031704239 | 0.033298405 | Anova p-value <= 0.05 | 1.21 | AMNB | AMB | RING-type domain-containing protein OS=Sarcophilus harrisii OX=9305 GN=RNF152 PE=4 SV=1 |
| **G8XYQ4** | 3 | 3 | 18.2 | 0.001794347 | 0.00385903 | Anova p-value <= 0.05 | 1.21 | AMNB | AMB | ATP synthase protein 8 OS=Antechinus flavipes OX=38775 GN=atp8 PE=3 SV=1 |
| **G3WVX1** | 111 | 86 | 1.12E+03 | 0.000402716 | 0.001397458 | Anova p-value <= 0.05 | 1.21 | AMB | AMNB | Clathrin heavy chain OS=Sarcophilus harrisii OX=9305 GN=CLTC PE=3 SV=1 |
| **G3WGB1** | 25 | 11 | 313 | 0.018187326 | 0.021387072 | Anova p-value <= 0.05 | 1.21 | AMB | AMNB | WD_REPEATS_REGION domain-containing protein OS=Sarcophilus harrisii OX=9305 GN=GNB1 PE=4 SV=1 |
| **G3WYP8** | 55 | 3 | 568 | 0.053491168 | 0.049684801 |  | 1.21 | AMB | AMNB | HATPase_c domain-containing protein OS=Sarcophilus harrisii OX=9305 GN=HSP90AB1 PE=3 SV=1 |
| **G3WYP7** | 56 | 3 | 610 | 0.053491168 | 0.049684801 |  | 1.21 | AMB | AMNB | HATPase_c domain-containing protein OS=Sarcophilus harrisii OX=9305 GN=HSP90AB1 PE=3 SV=1 |
| **G3WUC0** | 7 | 7 | 56.9 | 0.010655535 | 0.014114807 | Anova p-value <= 0.05 | 1.21 | AMNB | AMB | Syntaxin 1A OS=Sarcophilus harrisii OX=9305 GN=STX1A PE=4 SV=1 |
| **G3W7E8** | 5 | 1 | 40.5 | 0.03718965 | 0.037448979 | Anova p-value <= 0.05 | 1.21 | AMB | AMNB | UMP-CMP kinase OS=Sarcophilus harrisii OX=9305 GN=CMPK1 PE=3 SV=1 |
| **G3VLR0** | 4 | 4 | 32.4 | 0.025710974 | 0.02834841 | Anova p-value <= 0.05 | 1.21 | AMB | AMNB | Prostaglandin E synthase 3 OS=Sarcophilus harrisii OX=9305 GN=PTGES3 PE=4 SV=1 |
| **G3WM88** | 13 | 10 | 102 | 0.079861277 | 0.06896401 |  | 1.21 | AMB | AMNB | IF rod domain-containing protein OS=Sarcophilus harrisii OX=9305 GN=LOC100915011 PE=3 SV=1 |
| **G3WX18** | 4 | 1 | 24.7 | 0.016201655 | 0.019497956 | Anova p-value <= 0.05 | 1.21 | AMB | AMNB | Proteasome subunit alpha type OS=Sarcophilus harrisii OX=9305 GN=PSMA8 PE=3 SV=1 |
| **G3VKH0** | 5 | 3 | 25.2 | 0.005091247 | 0.008449121 | Anova p-value <= 0.05 | 1.2 | AMNB | AMB | PX domain-containing protein OS=Sarcophilus harrisii OX=9305 GN=SNX15 PE=4 SV=1 |
| **G3VU90** | 5 | 3 | 26.9 | 0.06114218 | 0.055422216 |  | 1.2 | AMB | AMNB | Heterogeneous nuclear ribonucleoprotein M OS=Sarcophilus harrisii OX=9305 GN=HNRNPM PE=4 SV=1 |
| **G3W1R9** | 3 | 2 | 17.8 | 0.027644138 | 0.029954364 | Anova p-value <= 0.05 | 1.2 | AMNB | AMB | ELAV-like protein OS=Sarcophilus harrisii OX=9305 GN=ELAVL1 PE=3 SV=1 |
| **G3WF91** | 15 | 11 | 145 | 0.00986351 | 0.013640671 | Anova p-value <= 0.05 | 1.2 | AMNB | AMB | Voltage dependent anion channel 2 OS=Sarcophilus harrisii OX=9305 GN=VDAC2 PE=4 SV=1 |
| **G3W1D6** | 53 | 30 | 577 | 0.001234721 | 0.002934402 | Anova p-value <= 0.05 | 1.2 | AMNB | AMB | HATPase_c domain-containing protein OS=Sarcophilus harrisii OX=9305 GN=HSP90AA1 PE=3 SV=1 |
| **G3W4V3** | 9 | 2 | 67.7 | 5.66E-05 | 0.000364063 | Anova p-value <= 0.05 | 1.2 | AMB | AMNB | Serine/threonine-protein phosphatase OS=Sarcophilus harrisii OX=9305 GN=PPP1CB PE=3 SV=1 |
| **G3W6D5** | 7 | 3 | 49.4 | 0.068573711 | 0.061081752 |  | 1.2 | AMNB | AMB | Aldehyde dehydrogenase OS=Sarcophilus harrisii OX=9305 GN=ALDH1A3 PE=3 SV=1 |
| **G3VE28** | 15 | 13 | 110 | 0.000455318 | 0.001497318 | Anova p-value <= 0.05 | 1.2 | AMNB | AMB | Guanine deaminase OS=Sarcophilus harrisii OX=9305 GN=GDA PE=3 SV=1 |
| **G3VEG3** | 6 | 5 | 72.4 | 0.000507351 | 0.001559617 | Anova p-value <= 0.05 | 1.2 | AMB | AMNB | V-type proton ATPase subunit G OS=Sarcophilus harrisii OX=9305 GN=ATP6V1G1 PE=3 SV=1 |
| **G3VFE6** | 1 | 1 | 5.04 | 0.055763288 | 0.051202978 |  | 1.2 | AMNB | AMB | Zinc ribbon domain containing 2 OS=Sarcophilus harrisii OX=9305 GN=ZNRD2 PE=4 SV=1 |
| **G3WLC8** | 21 | 1 | 132 | 0.000607959 | 0.001754468 | Anova p-value <= 0.05 | 1.2 | AMB | AMNB | Heat shock protein family A (Hsp70) member 4 OS=Sarcophilus harrisii OX=9305 GN=HSPA4 PE=3 SV=1 |
| **G3WML3** | 1 | 1 | 4.53 | 0.184930706 | 0.127718169 |  | 1.2 | AMB | AMNB | Potassium channel tetramerization domain containing 17 OS=Sarcophilus harrisii OX=9305 GN=KCTD17 PE=4 SV=1 |
| **G3VWD3** | 5 | 5 | 28.1 | 0.00046904 | 0.001507387 | Anova p-value <= 0.05 | 1.2 | AMB | AMNB | Uncharacterized protein OS=Sarcophilus harrisii OX=9305 PE=4 SV=1 |
| **G3W633** | 4 | 2 | 23 | 0.041664513 | 0.040985102 | Anova p-value <= 0.05 | 1.2 | AMNB | AMB | Uncharacterized protein OS=Sarcophilus harrisii OX=9305 PE=4 SV=1 |
| **G3W9C4** | 2 | 2 | 10.9 | 0.000705171 | 0.001945667 | Anova p-value <= 0.05 | 1.2 | AMB | AMNB | Uncharacterized protein OS=Sarcophilus harrisii OX=9305 GN=PUDP PE=4 SV=1 |
| **G3VKR5** | 3 | 2 | 12.8 | 0.004626115 | 0.00788906 | Anova p-value <= 0.05 | 1.2 | AMB | AMNB | Phospholipase A2 group IVE OS=Sarcophilus harrisii OX=9305 GN=PLA2G4E PE=4 SV=1 |
| **G3VJQ8** | 1 | 1 | 6.39 | 0.125136852 | 0.096038483 |  | 1.2 | AMB | AMNB | GABA type A receptor associated protein like 2 OS=Sarcophilus harrisii OX=9305 GN=GABARAPL2 PE=3 SV=1 |
| **G3VP04** | 10 | 8 | 88 | 3.42E-05 | 0.000251514 | Anova p-value <= 0.05 | 1.2 | AMB | AMNB | Uncharacterized protein OS=Sarcophilus harrisii OX=9305 GN=CNRIP1 PE=4 SV=1 |
| **G3VRK0** | 11 | 8 | 113 | 0.017790556 | 0.021007848 | Anova p-value <= 0.05 | 1.2 | AMNB | AMB | SH3 domain containing GRB2 like 2_ endophilin A1 OS=Sarcophilus harrisii OX=9305 GN=SH3GL2 PE=4 SV=1 |
| **G3WB63** | 7 | 6 | 50 | 0.006174045 | 0.009727537 | Anova p-value <= 0.05 | 1.19 | AMB | AMNB | Peptidyl-prolyl cis-trans isomerase OS=Sarcophilus harrisii OX=9305 GN=PIN1 PE=4 SV=1 |
| **G3WQH3** | 5 | 2 | 31.1 | 0.334149108 | 0.202575173 |  | 1.19 | AMB | AMNB | Myosin heavy chain 6 OS=Sarcophilus harrisii OX=9305 GN=MYH6 PE=3 SV=1 |
| **G3WV46** | 3 | 2 | 17.4 | 0.000860881 | 0.002286079 | Anova p-value <= 0.05 | 1.19 | AMNB | AMB | Heterogeneous nuclear ribonucleoprotein L like OS=Sarcophilus harrisii OX=9305 GN=HNRNPLL PE=4 SV=1 |
| **G3WW22** | 41 | 33 | 325 | 0.000461468 | 0.001500098 | Anova p-value <= 0.05 | 1.19 | AMB | AMNB | Valosin containing protein OS=Sarcophilus harrisii OX=9305 GN=VCP PE=3 SV=1 |
| **G3X1T1** | 3 | 2 | 16.4 | 0.091798803 | 0.076358197 |  | 1.19 | AMNB | AMB | Maelstrom spermatogenic transposon silencer OS=Sarcophilus harrisii OX=9305 GN=MAEL PE=4 SV=1 |
| **G3VV27** | 1 | 1 | 6.42 | 0.156696181 | 0.113888065 |  | 1.19 | AMB | AMNB | Pyridoxamine 5'-phosphate oxidase OS=Sarcophilus harrisii OX=9305 GN=PNPO PE=4 SV=1 |
| **G3WQP9** | 23 | 3 | 236 | 0.359276148 | 0.2148151 |  | 1.19 | AMNB | AMB | Calcium/calmodulin dependent protein kinase II beta OS=Sarcophilus harrisii OX=9305 GN=CAMK2B PE=4 SV=1 |
| **G3VX45** | 9 | 5 | 66.3 | 0.01979097 | 0.022892107 | Anova p-value <= 0.05 | 1.19 | AMNB | AMB | Protein kinase domain-containing protein OS=Sarcophilus harrisii OX=9305 GN=CSNK2A1 PE=3 SV=1 |
| **G3WPX4** | 6 | 4 | 54.2 | 0.022647044 | 0.025484454 | Anova p-value <= 0.05 | 1.19 | AMNB | AMB | Uncharacterized protein OS=Sarcophilus harrisii OX=9305 GN=RAC2 PE=4 SV=1 |
| **G3VQA4** | 5 | 4 | 27.4 | 0.007046177 | 0.010713667 | Anova p-value <= 0.05 | 1.19 | AMB | AMNB | Epsin 3 OS=Sarcophilus harrisii OX=9305 GN=EPN3 PE=4 SV=1 |
| **G3WN63** | 11 | 9 | 83.7 | 0.002685979 | 0.00503064 | Anova p-value <= 0.05 | 1.19 | AMB | AMNB | T-complex protein 1 subunit gamma OS=Sarcophilus harrisii OX=9305 GN=CCT3 PE=3 SV=1 |
| **G3WJN9** | 7 | 2 | 44.5 | 0.129883387 | 0.098610892 |  | 1.19 | AMB | AMNB | RAB4A_ member RAS oncogene family OS=Sarcophilus harrisii OX=9305 GN=RAB4A PE=4 SV=1 |
| **G3WY29** | 12 | 6 | 106 | 0.014977644 | 0.018376811 | Anova p-value <= 0.05 | 1.19 | AMB | AMNB | Uncharacterized protein OS=Sarcophilus harrisii OX=9305 PE=4 SV=1 |
| **G3VD73** | 6 | 1 | 40.4 | 0.07038139 | 0.062357156 |  | 1.19 | AMB | AMNB | Phosphatidylinositol-4-phosphate 3-kinase catalytic subunit type 2 alpha OS=Sarcophilus harrisii OX=9305 GN=PIK3C2A PE=3 SV=1 |
| **G3WRD3** | 4 | 3 | 24.1 | 0.010267098 | 0.013865399 | Anova p-value <= 0.05 | 1.19 | AMB | AMNB | WD_REPEATS_REGION domain-containing protein OS=Sarcophilus harrisii OX=9305 GN=DYNC1I2 PE=4 SV=1 |
| **G3WRQ7** | 29 | 6 | 271 | 0.000136515 | 0.000677336 | Anova p-value <= 0.05 | 1.19 | AMB | AMNB | Pyruvate dehydrogenase E1 component subunit alpha OS=Sarcophilus harrisii OX=9305 GN=PDHA1 PE=4 SV=1 |
| **G3WU81** | 8 | 7 | 61.2 | 0.087594892 | 0.073510003 |  | 1.19 | AMNB | AMB | Electron transfer flavoprotein subunit alpha OS=Sarcophilus harrisii OX=9305 GN=ETFA PE=4 SV=1 |
| **G3VZ72** | 10 | 7 | 73.7 | 0.104365435 | 0.083970922 |  | 1.19 | AMB | AMNB | Uncharacterized protein OS=Sarcophilus harrisii OX=9305 GN=PCBP2 PE=4 SV=1 |
| **G3VIJ8** | 56 | 47 | 621 | 0.000779769 | 0.002116936 | Anova p-value <= 0.05 | 1.19 | AMB | AMNB | ATP synthase subunit beta OS=Sarcophilus harrisii OX=9305 GN=ATP5F1B PE=3 SV=1 |
| **G3WRR6** | 6 | 2 | 46.5 | 0.131058555 | 0.099236704 |  | 1.19 | AMNB | AMB | Vesicle associated membrane protein 3 OS=Sarcophilus harrisii OX=9305 GN=VAMP3 PE=4 SV=1 |
| **G3WRD7** | 4 | 3 | 30.1 | 0.082248573 | 0.0699575 |  | 1.19 | AMB | AMNB | Uncharacterized protein OS=Sarcophilus harrisii OX=9305 GN=NDRG1 PE=4 SV=1 |
| **G3WKJ0** | 3 | 1 | 20.8 | 0.001857017 | 0.003948769 | Anova p-value <= 0.05 | 1.19 | AMB | AMNB | Uncharacterized protein OS=Sarcophilus harrisii OX=9305 PE=4 SV=1 |
| **G3VPR3** | 1 | 1 | 6.23 | 0.934963761 | 0.442541934 |  | 1.19 | AMB | AMNB | Replication factor C subunit 2 OS=Sarcophilus harrisii OX=9305 GN=RFC2 PE=4 SV=1 |
| **G3X0H0** | 2 | 1 | 13.2 | 0.964289841 | 0.45308864 |  | 1.19 | AMNB | AMB | Cystatin B OS=Sarcophilus harrisii OX=9305 GN=CSTB PE=3 SV=1 |
| **G3VZ56** | 7 | 5 | 44 | 0.291125341 | 0.182558067 |  | 1.19 | AMB | AMNB | Versican OS=Sarcophilus harrisii OX=9305 GN=VCAN PE=4 SV=1 |
| **G3VMV1** | 4 | 2 | 23.3 | 0.148443253 | 0.109326841 |  | 1.19 | AMNB | AMB | Uncharacterized protein OS=Sarcophilus harrisii OX=9305 PE=4 SV=1 |
| **G3WGG2** | 3 | 3 | 11.1 | 0.055442973 | 0.050991637 |  | 1.18 | AMB | AMNB | Uncharacterized protein OS=Sarcophilus harrisii OX=9305 GN=LMNB1 PE=3 SV=1 |
| **G3WP22** | 18 | 1 | 210 | 0.004694416 | 0.007902598 | Anova p-value <= 0.05 | 1.18 | AMB | AMNB | Uncharacterized protein OS=Sarcophilus harrisii OX=9305 GN=ARF1 PE=3 SV=1 |
| **G3VLR6** | 17 | 1 | 206 | 0.004694416 | 0.007902598 | Anova p-value <= 0.05 | 1.18 | AMB | AMNB | ADP ribosylation factor 3 OS=Sarcophilus harrisii OX=9305 GN=ARF3 PE=3 SV=1 |
| **G3WYU5** | 2 | 1 | 13.4 | 0.045194602 | 0.043697667 | Anova p-value <= 0.05 | 1.18 | AMB | AMNB | Cullin 2 OS=Sarcophilus harrisii OX=9305 GN=CUL2 PE=3 SV=1 |
| **G3VSY9** | 5 | 2 | 30.8 | 0.004663357 | 0.007902598 | Anova p-value <= 0.05 | 1.18 | AMB | AMNB | Uncharacterized protein OS=Sarcophilus harrisii OX=9305 PE=4 SV=1 |
| **G3X044** | 4 | 3 | 21.3 | 0.002523135 | 0.00488559 | Anova p-value <= 0.05 | 1.18 | AMB | AMNB | AA_TRNA_LIGASE_II domain-containing protein OS=Sarcophilus harrisii OX=9305 GN=NARS PE=4 SV=1 |
| **G3WB66** | 2 | 2 | 30 | 0.062310981 | 0.056391303 |  | 1.18 | AMB | AMNB | Folate gamma-glutamyl hydrolase OS=Sarcophilus harrisii OX=9305 GN=GGH PE=4 SV=1 |
| **G3WAX2** | 3 | 3 | 16.1 | 0.000973527 | 0.002462814 | Anova p-value <= 0.05 | 1.18 | AMB | AMNB | Uncharacterized protein OS=Sarcophilus harrisii OX=9305 GN=PAPPA PE=4 SV=1 |
| **G3X3I4** | 3 | 2 | 19.9 | 0.11422001 | 0.090105353 |  | 1.18 | AMNB | AMB | Uncharacterized protein OS=Sarcophilus harrisii OX=9305 PE=3 SV=1 |
| **G3WAE1** | 3 | 2 | 17.7 | 0.251807202 | 0.162516821 |  | 1.18 | AMNB | AMB | DNA repair protein REV1 OS=Sarcophilus harrisii OX=9305 GN=REV1 PE=3 SV=1 |
| **G3VH23** | 3 | 1 | 22.8 | 0.158321564 | 0.114514604 |  | 1.18 | AMB | AMNB | Uncharacterized protein OS=Sarcophilus harrisii OX=9305 PE=4 SV=1 |
| **G3VMZ6** | 6 | 2 | 48.1 | 0.205852266 | 0.138612987 |  | 1.18 | AMB | AMNB | G protein subunit alpha transducin 2 OS=Sarcophilus harrisii OX=9305 GN=GNAT2 PE=4 SV=1 |
| **G3VXK9** | 1 | 1 | 6.1 | 0.412889225 | 0.237096354 |  | 1.18 | AMNB | AMB | BTB_2 domain-containing protein OS=Sarcophilus harrisii OX=9305 PE=4 SV=1 |
| **G3WAV5** | 31 | 24 | 266 | 0.006455718 | 0.010114978 | Anova p-value <= 0.05 | 1.18 | AMB | AMNB | Dihydropyrimidinase like 5 OS=Sarcophilus harrisii OX=9305 GN=DPYSL5 PE=4 SV=1 |
| **G3VQV1** | 3 | 2 | 24 | 0.147154065 | 0.108802377 |  | 1.18 | AMB | AMNB | Uncharacterized protein OS=Sarcophilus harrisii OX=9305 GN=CALB1 PE=4 SV=1 |
| **G3WXT4** | 19 | 18 | 153 | 0.020761727 | 0.023723886 | Anova p-value <= 0.05 | 1.18 | AMB | AMNB | Phosphoglucomutase 1 OS=Sarcophilus harrisii OX=9305 GN=PGM1 PE=3 SV=1 |
| **G3VK25** | 19 | 15 | 116 | 0.012784437 | 0.016360136 | Anova p-value <= 0.05 | 1.18 | AMNB | AMB | Dynamin 1 like OS=Sarcophilus harrisii OX=9305 GN=DNM1L PE=3 SV=1 |
| **G3WSZ4** | 8 | 4 | 60.9 | 0.032766251 | 0.034068688 | Anova p-value <= 0.05 | 1.18 | AMB | AMNB | Proteasome subunit beta OS=Sarcophilus harrisii OX=9305 GN=PSMB1 PE=3 SV=1 |
| **G3WDP4** | 25 | 3 | 152 | 0.111773864 | 0.088810184 |  | 1.18 | AMB | AMNB | Kinesin family member 26A OS=Sarcophilus harrisii OX=9305 GN=KIF26A PE=3 SV=1 |
| **G3VMM5** | 7 | 5 | 72.5 | 0.053043184 | 0.049590874 |  | 1.18 | AMB | AMNB | Sidoreflexin OS=Sarcophilus harrisii OX=9305 GN=SFXN1 PE=3 SV=1 |
| **G3VER3** | 5 | 3 | 33.9 | 0.032529115 | 0.033946931 | Anova p-value <= 0.05 | 1.18 | AMB | AMNB | NADH:ubiquinone oxidoreductase subunit A13 OS=Sarcophilus harrisii OX=9305 GN=NDUFA13 PE=4 SV=1 |
| **G3WHI8** | 5 | 3 | 28.7 | 0.020957226 | 0.023898997 | Anova p-value <= 0.05 | 1.18 | AMB | AMNB | FERM domain containing 7 OS=Sarcophilus harrisii OX=9305 GN=FRMD7 PE=4 SV=1 |
| **G3VZS0** | 39 | 30 | 385 | 0.002530796 | 0.00488559 | Anova p-value <= 0.05 | 1.18 | AMB | AMNB | Uncharacterized protein OS=Sarcophilus harrisii OX=9305 GN=ATP6V1A PE=3 SV=1 |
| **G3WT59** | 11 | 9 | 75.8 | 0.033366777 | 0.034439851 | Anova p-value <= 0.05 | 1.18 | AMB | AMNB | Uncharacterized protein OS=Sarcophilus harrisii OX=9305 PE=4 SV=1 |
| **G3VMS5** | 17 | 12 | 174 | 0.002318958 | 0.004634832 | Anova p-value <= 0.05 | 1.18 | AMB | AMNB | Dihydrolipoyl dehydrogenase OS=Sarcophilus harrisii OX=9305 GN=DLD PE=3 SV=1 |
| **G3WZY8** | 11 | 8 | 95.2 | 0.001320984 | 0.00310033 | Anova p-value <= 0.05 | 1.18 | AMNB | AMB | Uncharacterized protein OS=Sarcophilus harrisii OX=9305 GN=RAB14 PE=4 SV=1 |
| **G3WPE0** | 1 | 1 | 7.72 | 0.037187105 | 0.037448979 | Anova p-value <= 0.05 | 1.18 | AMB | AMNB | Uncharacterized protein OS=Sarcophilus harrisii OX=9305 PE=3 SV=1 |
| **G3W6U3** | 4 | 3 | 30.7 | 0.098856839 | 0.081010202 |  | 1.18 | AMNB | AMB | VHS domain-containing protein OS=Sarcophilus harrisii OX=9305 PE=4 SV=1 |
| **G3WKN4** | 17 | 12 | 138 | 0.062781513 | 0.056726371 |  | 1.18 | AMB | AMNB | Hydroxyacylglutathione hydrolase OS=Sarcophilus harrisii OX=9305 GN=HAGH PE=3 SV=1 |
| **G3VFH0** | 2 | 2 | 10.4 | 0.451324929 | 0.255791635 |  | 1.18 | AMB | AMNB | Interleukin enhancer binding factor 3 OS=Sarcophilus harrisii OX=9305 GN=ILF3 PE=4 SV=1 |
| **G3WT31** | 7 | 1 | 68.5 | 0.042080068 | 0.041322017 | Anova p-value <= 0.05 | 1.18 | AMNB | AMB | SH3 domain containing GRB2 like 1_ endophilin A2 OS=Sarcophilus harrisii OX=9305 GN=SH3GL1 PE=4 SV=1 |
| **G3WJM7** | 17 | 13 | 129 | 0.00019561 | 0.000857685 | Anova p-value <= 0.05 | 1.18 | AMB | AMNB | Protein kinase cAMP-dependent type II regulatory subunit alpha OS=Sarcophilus harrisii OX=9305 GN=PRKAR2A PE=4 SV=1 |
| **G3WU95** | 11 | 8 | 112 | 0.01470213 | 0.018082954 | Anova p-value <= 0.05 | 1.18 | AMB | AMNB | Transgelin OS=Sarcophilus harrisii OX=9305 GN=TAGLN3 PE=3 SV=1 |
| **G3WMZ0** | 2 | 1 | 18.2 | 0.028824654 | 0.030937203 | Anova p-value <= 0.05 | 1.18 | AMB | AMNB | Uncharacterized protein OS=Sarcophilus harrisii OX=9305 PE=4 SV=1 |
| **G3VXP4** | 4 | 2 | 25.5 | 0.173505318 | 0.122215081 |  | 1.18 | AMNB | AMB | 40S ribosomal protein SA OS=Sarcophilus harrisii OX=9305 GN=RPSA PE=3 SV=1 |
| **G3WTY6** | 6 | 5 | 33.2 | 0.018825762 | 0.022000612 | Anova p-value <= 0.05 | 1.18 | AMNB | AMB | Ubiquitin carboxyl-terminal hydrolase OS=Sarcophilus harrisii OX=9305 GN=USP5 PE=3 SV=1 |
| **G3VT76** | 15 | 12 | 90.7 | 0.007375263 | 0.011036041 | Anova p-value <= 0.05 | 1.18 | AMNB | AMB | PH domain-containing protein OS=Sarcophilus harrisii OX=9305 PE=4 SV=1 |
| **G3X0Q3** | 7 | 5 | 58 | 0.074804443 | 0.0655987 |  | 1.18 | AMNB | AMB | GTP-binding nuclear protein Ran OS=Sarcophilus harrisii OX=9305 GN=RAN PE=3 SV=1 |
| **G3VSD9** | 5 | 1 | 36.3 | 0.147804656 | 0.108998446 |  | 1.17 | AMNB | AMB | IF rod domain-containing protein OS=Sarcophilus harrisii OX=9305 GN=PRPH PE=3 SV=1 |
| **G3X1G5** | 25 | 19 | 273 | 0.000782216 | 0.002116936 | Anova p-value <= 0.05 | 1.17 | AMB | AMNB | Uncharacterized protein OS=Sarcophilus harrisii OX=9305 PE=3 SV=1 |
| **G3WKY2** | 4 | 1 | 26.4 | 0.043880279 | 0.042718973 | Anova p-value <= 0.05 | 1.17 | AMNB | AMB | C2H2-type domain-containing protein OS=Sarcophilus harrisii OX=9305 GN=DZIP1 PE=4 SV=1 |
| **G3WAR7** | 1 | 1 | 11.3 | 0.09870792 | 0.081010202 |  | 1.17 | AMB | AMNB | Interleukin-5 OS=Sarcophilus harrisii OX=9305 GN=IL5 PE=3 SV=1 |
| **G3WSC4** | 2 | 2 | 11.2 | 0.128344806 | 0.097952603 |  | 1.17 | AMNB | AMB | CRIB domain-containing protein OS=Sarcophilus harrisii OX=9305 GN=CDC42EP4 PE=4 SV=1 |
| **G3WP46** | 3 | 3 | 17.9 | 0.216705563 | 0.14420446 |  | 1.17 | AMB | AMNB | Vacuolar protein sorting-associated protein 29 OS=Sarcophilus harrisii OX=9305 GN=VPS29 PE=3 SV=1 |
| **G3WGI3** | 7 | 4 | 51.4 | 0.080026945 | 0.069001726 |  | 1.17 | AMNB | AMB | Breast carcinoma amplified sequence 1 OS=Sarcophilus harrisii OX=9305 GN=BCAS1 PE=4 SV=1 |
| **G3VKE1** | 25 | 14 | 229 | 0.00018555 | 0.00083316 | Anova p-value <= 0.05 | 1.17 | AMB | AMNB | Serine/threonine-protein phosphatase OS=Sarcophilus harrisii OX=9305 GN=PPP3CA PE=3 SV=1 |
| **G3WRT3** | 30 | 22 | 292 | 0.000296395 | 0.001125153 | Anova p-value <= 0.05 | 1.17 | AMB | AMNB | L-lactate dehydrogenase OS=Sarcophilus harrisii OX=9305 GN=LDHB PE=3 SV=1 |
| **G3WR80** | 1 | 1 | 4.62 | 0.106975216 | 0.085704974 |  | 1.17 | AMNB | AMB | Uncharacterized protein OS=Sarcophilus harrisii OX=9305 PE=4 SV=1 |
| **G3VKE9** | 2 | 1 | 19.4 | 0.037363027 | 0.037537143 | Anova p-value <= 0.05 | 1.17 | AMNB | AMB | Uncharacterized protein OS=Sarcophilus harrisii OX=9305 PE=3 SV=1 |
| **G3VBI6** | 22 | 16 | 176 | 0.006231095 | 0.009790153 | Anova p-value <= 0.05 | 1.17 | AMB | AMNB | Protein phosphatase 2 scaffold subunit Aalpha OS=Sarcophilus harrisii OX=9305 GN=PPP2R1A PE=4 SV=1 |
| **G3VHU9** | 4 | 4 | 22.5 | 0.000171394 | 0.000801193 | Anova p-value <= 0.05 | 1.17 | AMB | AMNB | Crystallin mu OS=Sarcophilus harrisii OX=9305 GN=CRYM PE=4 SV=1 |
| **G3VPX5** | 4 | 3 | 27.2 | 0.010340995 | 0.013926455 | Anova p-value <= 0.05 | 1.17 | AMB | AMNB | ETF domain-containing protein OS=Sarcophilus harrisii OX=9305 GN=ETFB PE=4 SV=1 |
| **G3VE57** | 25 | 1 | 385 | 0.190545409 | 0.130638774 |  | 1.17 | AMB | AMNB | Tubulin_C domain-containing protein OS=Sarcophilus harrisii OX=9305 PE=3 SV=1 |
| **G3VHV2** | 1 | 1 | 6.04 | 0.0341524 | 0.035122554 | Anova p-value <= 0.05 | 1.17 | AMB | AMNB | WD_REPEATS_REGION domain-containing protein OS=Sarcophilus harrisii OX=9305 PE=4 SV=1 |
| **G3WW80** | 15 | 15 | 165 | 0.00052688 | 0.001585207 | Anova p-value <= 0.05 | 1.17 | AMB | AMNB | Glycoprotein M6A OS=Sarcophilus harrisii OX=9305 GN=GPM6A PE=4 SV=1 |
| **G3W775** | 7 | 6 | 45.1 | 0.010427349 | 0.014009395 | Anova p-value <= 0.05 | 1.17 | AMB | AMNB | ATPase H+ transporting V1 subunit D OS=Sarcophilus harrisii OX=9305 GN=ATP6V1D PE=4 SV=1 |
| **G3VPK8** | 8 | 4 | 73.2 | 0.00117728 | 0.002845715 | Anova p-value <= 0.05 | 1.17 | AMB | AMNB | Myosin light chain 6 OS=Sarcophilus harrisii OX=9305 GN=MYL6 PE=4 SV=1 |
| **G3WND8** | 1 | 1 | 6.03 | 0.059709814 | 0.054561038 |  | 1.17 | AMNB | AMB | ElaC ribonuclease Z 1 OS=Sarcophilus harrisii OX=9305 GN=ELAC1 PE=3 SV=1 |
| **G3VZ33** | 6 | 4 | 30.7 | 0.090218959 | 0.075488131 |  | 1.17 | AMNB | AMB | Sema domain-containing protein OS=Sarcophilus harrisii OX=9305 GN=PLXNA2 PE=4 SV=1 |
| **G3WSK5** | 12 | 7 | 77.2 | 0.003531314 | 0.00636113 | Anova p-value <= 0.05 | 1.17 | AMB | AMNB | Proteasome subunit alpha type OS=Sarcophilus harrisii OX=9305 GN=PSMA1 PE=3 SV=1 |
| **G3WVW3** | 2 | 1 | 12.7 | 0.074962933 | 0.065635925 |  | 1.17 | AMNB | AMB | T-box_ brain 1 OS=Sarcophilus harrisii OX=9305 GN=TBR1 PE=4 SV=1 |
| **G3WFR3** | 6 | 2 | 33.3 | 0.017159954 | 0.020563719 | Anova p-value <= 0.05 | 1.17 | AMNB | AMB | ST18 C2H2C-type zinc finger transcription factor OS=Sarcophilus harrisii OX=9305 GN=ST18 PE=4 SV=1 |
| **G3WMZ8** | 8 | 3 | 48.2 | 0.228959847 | 0.150938349 |  | 1.16 | AMNB | AMB | Protein phosphatase 2 scaffold subunit Abeta OS=Sarcophilus harrisii OX=9305 GN=PPP2R1B PE=4 SV=1 |
| **G3WIT6** | 1 | 1 | 7.36 | 0.91913794 | 0.437614606 |  | 1.16 | AMB | AMNB | NADH dehydrogenase [ubiquinone] 1 subunit C2 OS=Sarcophilus harrisii OX=9305 PE=3 SV=1 |
| **G3WNY7** | 20 | 10 | 144 | 0.000329015 | 0.001193683 | Anova p-value <= 0.05 | 1.16 | AMB | AMNB | Uncharacterized protein OS=Sarcophilus harrisii OX=9305 GN=SYT2 PE=4 SV=1 |
| **G3WJR3** | 42 | 17 | 440 | 0.052495458 | 0.049323376 |  | 1.16 | AMB | AMNB | Malate dehydrogenase OS=Sarcophilus harrisii OX=9305 GN=MDH2 PE=3 SV=1 |
| **G3WTN4** | 2 | 1 | 13.5 | 0.165669107 | 0.118018091 |  | 1.16 | AMNB | AMB | Homeobox domain-containing protein OS=Sarcophilus harrisii OX=9305 GN=HOXD12 PE=4 SV=1 |
| **G3WQJ2** | 49 | 39 | 417 | 0.002557731 | 0.004887545 | Anova p-value <= 0.05 | 1.16 | AMB | AMNB | Uncharacterized protein OS=Sarcophilus harrisii OX=9305 GN=NSF PE=4 SV=1 |
| **G3VVY5** | 5 | 2 | 36.9 | 0.001483447 | 0.003383358 | Anova p-value <= 0.05 | 1.16 | AMB | AMNB | Stathmin OS=Sarcophilus harrisii OX=9305 GN=STMN1 PE=3 SV=1 |
| **G3X0Z9** | 6 | 5 | 48.7 | 0.022850211 | 0.025644087 | Anova p-value <= 0.05 | 1.16 | AMB | AMNB | Proteasome subunit alpha type OS=Sarcophilus harrisii OX=9305 GN=PSMA5 PE=3 SV=1 |
| **G3WWZ7** | 1 | 1 | 6.3 | 0.488889205 | 0.272709363 |  | 1.16 | AMNB | AMB | Haptoglobin OS=Sarcophilus harrisii OX=9305 GN=LOC100923915 PE=3 SV=1 |
| **G3VPK1** | 13 | 1 | 116 | 0.033254423 | 0.034439851 | Anova p-value <= 0.05 | 1.16 | AMB | AMNB | Uncharacterized protein OS=Sarcophilus harrisii OX=9305 GN=SCRN1 PE=4 SV=1 |
| **G3WGK9** | 16 | 7 | 134 | 0.080346071 | 0.069171442 |  | 1.16 | AMB | AMNB | Aldedh domain-containing protein OS=Sarcophilus harrisii OX=9305 PE=3 SV=1 |
| **G3VFY1** | 37 | 25 | 439 | 0.000829888 | 0.002214172 | Anova p-value <= 0.05 | 1.16 | AMB | AMNB | Phosphoglycerate kinase OS=Sarcophilus harrisii OX=9305 PE=3 SV=1 |
| **G3VEF9** | 2 | 1 | 19.1 | 0.211611368 | 0.141647803 |  | 1.16 | AMB | AMNB | Uncharacterized protein OS=Sarcophilus harrisii OX=9305 GN=NHSL1 PE=4 SV=1 |
| **G3WGH3** | 18 | 10 | 136 | 0.029558623 | 0.031605021 | Anova p-value <= 0.05 | 1.16 | AMB | AMNB | Septin-type G domain-containing protein OS=Sarcophilus harrisii OX=9305 PE=3 SV=1 |
| **G3VHV3** | 1 | 1 | 4.79 | 0.400971366 | 0.232853065 |  | 1.16 | AMNB | AMB | Ig-like domain-containing protein OS=Sarcophilus harrisii OX=9305 GN=LOC100916115 PE=4 SV=1 |
| **G3WCX9** | 4 | 2 | 32.3 | 0.046716428 | 0.044629615 | Anova p-value <= 0.05 | 1.16 | AMB | AMNB | Formin like 1 OS=Sarcophilus harrisii OX=9305 GN=FMNL1 PE=4 SV=1 |
| **G3VML3** | 7 | 4 | 45.1 | 0.014116651 | 0.017681042 | Anova p-value <= 0.05 | 1.16 | AMB | AMNB | FERM domain-containing protein OS=Sarcophilus harrisii OX=9305 GN=EPB41L1 PE=4 SV=1 |
| **G3WHY3** | 15 | 11 | 97.9 | 0.181092488 | 0.125681219 |  | 1.16 | AMNB | AMB | Acetyltransferase component of pyruvate dehydrogenase complex OS=Sarcophilus harrisii OX=9305 GN=DLAT PE=3 SV=1 |
| **G3W692** | 2 | 2 | 17.2 | 0.701079581 | 0.360170016 |  | 1.16 | AMB | AMNB | IF rod domain-containing protein OS=Sarcophilus harrisii OX=9305 GN=LOC100922568 PE=3 SV=1 |
| **G3VSN2** | 19 | 15 | 132 | 0.191386421 | 0.130934059 |  | 1.16 | AMB | AMNB | Uncharacterized protein OS=Sarcophilus harrisii OX=9305 GN=CCT2 PE=3 SV=1 |
| **G3VLD3** | 3 | 2 | 19.4 | 0.018407896 | 0.021601538 | Anova p-value <= 0.05 | 1.16 | AMB | AMNB | DUF2040 domain-containing protein OS=Sarcophilus harrisii OX=9305 PE=4 SV=1 |
| **G3WRN5** | 13 | 1 | 123 | 0.102026933 | 0.082476742 |  | 1.16 | AMNB | AMB | Uncharacterized protein OS=Sarcophilus harrisii OX=9305 PE=4 SV=1 |
| **G3WJL6** | 11 | 7 | 84.6 | 0.226978497 | 0.149981782 |  | 1.16 | AMNB | AMB | Heterogeneous nuclear ribonucleoprotein D OS=Sarcophilus harrisii OX=9305 GN=HNRNPD PE=4 SV=1 |
| **G3WJ25** | 10 | 6 | 58 | 0.024872043 | 0.027476984 | Anova p-value <= 0.05 | 1.16 | AMB | AMNB | V-type proton ATPase subunit OS=Sarcophilus harrisii OX=9305 GN=ATP6V0D1 PE=3 SV=1 |
| **G3WPR7** | 4 | 3 | 33.9 | 0.034646447 | 0.035437341 | Anova p-value <= 0.05 | 1.16 | AMNB | AMB | Actin-related protein 2/3 complex subunit 3 OS=Sarcophilus harrisii OX=9305 GN=ARPC3 PE=3 SV=1 |
| **G3VV16** | 5 | 4 | 32 | 0.0079174 | 0.011601732 | Anova p-value <= 0.05 | 1.16 | AMB | AMNB | NTF2 domain-containing protein OS=Sarcophilus harrisii OX=9305 GN=NUTF2 PE=4 SV=1 |
| **G3VJY4** | 13 | 9 | 84.3 | 0.522772872 | 0.287080289 |  | 1.16 | AMB | AMNB | Contactin 1 OS=Sarcophilus harrisii OX=9305 GN=CNTN1 PE=4 SV=1 |
| **G3VCB1** | 1 | 1 | 6.17 | 0.168778002 | 0.119480387 |  | 1.16 | AMNB | AMB | Proteasome 26S subunit_ non-ATPase 7 OS=Sarcophilus harrisii OX=9305 GN=PSMD7 PE=4 SV=1 |
| **G3WMH0** | 1 | 1 | 6.03 | 0.374577308 | 0.220927823 |  | 1.16 | AMNB | AMB | Importin subunit alpha OS=Sarcophilus harrisii OX=9305 GN=KPNA1 PE=3 SV=1 |
| **G3VYW6** | 1 | 1 | 3.73 | 0.305179516 | 0.189480516 |  | 1.16 | AMB | AMNB | Uncharacterized protein OS=Sarcophilus harrisii OX=9305 PE=4 SV=1 |
| **G3VAL5** | 3 | 1 | 20.4 | 0.284362916 | 0.179886961 |  | 1.16 | AMB | AMNB | Uncharacterized protein OS=Sarcophilus harrisii OX=9305 PE=3 SV=1 |
| **G3W0G0** | 15 | 8 | 126 | 0.001559608 | 0.003512121 | Anova p-value <= 0.05 | 1.15 | AMNB | AMB | Mitogen-activated protein kinase OS=Sarcophilus harrisii OX=9305 GN=MAPK1 PE=4 SV=1 |
| **G3W816** | 14 | 8 | 168 | 0.0175254 | 0.020825169 | Anova p-value <= 0.05 | 1.15 | AMB | AMNB | Phosphoglycerate kinase OS=Sarcophilus harrisii OX=9305 GN=LOC100925190 PE=3 SV=1 |
| **G3VYE9** | 12 | 11 | 79.2 | 0.001649218 | 0.003603252 | Anova p-value <= 0.05 | 1.15 | AMNB | AMB | Translocase of outer mitochondrial membrane 70 OS=Sarcophilus harrisii OX=9305 GN=TOMM70 PE=4 SV=1 |
| **G3VAC1** | 2 | 2 | 12.7 | 0.102070909 | 0.082476742 |  | 1.15 | AMNB | AMB | Ribosomal protein S8 OS=Sarcophilus harrisii OX=9305 GN=RPS8 PE=4 SV=1 |
| **G3WFC8** | 2 | 2 | 12 | 0.26378905 | 0.169167034 |  | 1.15 | AMNB | AMB | U6 small nuclear RNA (adenine-(43)-N(6))-methyltransferase OS=Sarcophilus harrisii OX=9305 GN=METTL16 PE=3 SV=1 |
| **G3WLX5** | 5 | 4 | 36.5 | 0.001676503 | 0.003647192 | Anova p-value <= 0.05 | 1.15 | AMB | AMNB | Peptidylprolyl isomerase OS=Sarcophilus harrisii OX=9305 GN=FKBP4 PE=4 SV=1 |
| **G3VX20** | 4 | 3 | 27.5 | 0.020322776 | 0.023363907 | Anova p-value <= 0.05 | 1.15 | AMB | AMNB | Chaperonin containing TCP1 subunit 6B OS=Sarcophilus harrisii OX=9305 GN=CCT6B PE=3 SV=1 |
| **G3W9P3** | 34 | 16 | 354 | 0.024438287 | 0.027103672 | Anova p-value <= 0.05 | 1.15 | AMB | AMNB | Uncharacterized protein OS=Sarcophilus harrisii OX=9305 GN=HSPA2 PE=3 SV=1 |
| **G3VW85** | 24 | 14 | 165 | 0.00196538 | 0.004110965 | Anova p-value <= 0.05 | 1.15 | AMB | AMNB | Adducin 2 OS=Sarcophilus harrisii OX=9305 GN=ADD2 PE=4 SV=1 |
| **G3WRK5** | 21 | 2 | 198 | 0.163806419 | 0.117282005 |  | 1.15 | AMNB | AMB | Neural cell adhesion molecule 1 OS=Sarcophilus harrisii OX=9305 GN=NCAM1 PE=4 SV=1 |
| **G3VF71** | 28 | 20 | 234 | 0.070308846 | 0.062357156 |  | 1.15 | AMB | AMNB | Adenylyl cyclase-associated protein OS=Sarcophilus harrisii OX=9305 GN=CAP1 PE=3 SV=1 |
| **G3VCY7** | 26 | 11 | 269 | 0.000980236 | 0.002464197 | Anova p-value <= 0.05 | 1.15 | AMNB | AMB | Uncharacterized protein OS=Sarcophilus harrisii OX=9305 GN=SLC25A4 PE=3 SV=1 |
| **G3VEP1** | 5 | 4 | 29 | 0.011277596 | 0.014869172 | Anova p-value <= 0.05 | 1.15 | AMB | AMNB | G_PROTEIN_RECEP_F1_2 domain-containing protein OS=Sarcophilus harrisii OX=9305 PE=3 SV=1 |
| **G3WPF3** | 3 | 3 | 16.9 | 0.031731065 | 0.033298405 | Anova p-value <= 0.05 | 1.15 | AMB | AMNB | Ubiquitin carboxyl-terminal hydrolase OS=Sarcophilus harrisii OX=9305 GN=USP14 PE=3 SV=1 |
| **G3VHE1** | 1 | 1 | 4.41 | 0.306967504 | 0.189965075 |  | 1.15 | AMNB | AMB | Uncharacterized protein OS=Sarcophilus harrisii OX=9305 PE=4 SV=1 |
| **G3WGI0** | 4 | 3 | 35.7 | 0.149499262 | 0.109961401 |  | 1.15 | AMB | AMNB | Uncharacterized protein OS=Sarcophilus harrisii OX=9305 GN=ATP5ME PE=4 SV=1 |
| **G3VCR5** | 3 | 2 | 17.4 | 0.113483456 | 0.089774722 |  | 1.15 | AMB | AMNB | Uncharacterized protein OS=Sarcophilus harrisii OX=9305 PE=4 SV=1 |
| **G3VQB4** | 4 | 1 | 34.5 | 0.011985824 | 0.015513651 | Anova p-value <= 0.05 | 1.15 | AMNB | AMB | IF rod domain-containing protein OS=Sarcophilus harrisii OX=9305 GN=KRT78 PE=3 SV=1 |
| **G3VAW6** | 20 | 9 | 123 | 0.030083997 | 0.031985376 | Anova p-value <= 0.05 | 1.15 | AMB | AMNB | Uncharacterized protein OS=Sarcophilus harrisii OX=9305 PE=4 SV=1 |
| **G3WNI5** | 3 | 1 | 17.1 | 0.251298523 | 0.162446156 |  | 1.15 | AMNB | AMB | CNNM transmembrane domain-containing protein OS=Sarcophilus harrisii OX=9305 PE=4 SV=1 |
| **G3VMB8** | 14 | 12 | 98.5 | 0.100315658 | 0.081407329 |  | 1.15 | AMB | AMNB | WD repeat domain 1 OS=Sarcophilus harrisii OX=9305 GN=WDR1 PE=4 SV=1 |
| **G3WT29** | 27 | 21 | 288 | 0.020022999 | 0.023066154 | Anova p-value <= 0.05 | 1.15 | AMB | AMNB | L-lactate dehydrogenase OS=Sarcophilus harrisii OX=9305 GN=LDHA PE=3 SV=1 |
| **G3W8H2** | 16 | 9 | 108 | 0.00196672 | 0.004110965 | Anova p-value <= 0.05 | 1.15 | AMB | AMNB | Septin 4 OS=Sarcophilus harrisii OX=9305 GN=SEPT4 PE=3 SV=1 |
| **G3WMD5** | 14 | 13 | 86.6 | 0.014030873 | 0.017635985 | Anova p-value <= 0.05 | 1.15 | AMB | AMNB | Hydroxyacyl-CoA dehydrogenase trifunctional multienzyme complex subunit alpha OS=Sarcophilus harrisii OX=9305 GN=HADHA PE=3 SV=1 |
| **G3WPQ6** | 9 | 7 | 75.9 | 0.008238751 | 0.011979518 | Anova p-value <= 0.05 | 1.15 | AMB | AMNB | Superoxide dismutase OS=Sarcophilus harrisii OX=9305 GN=SOD2 PE=3 SV=1 |
| **G3WMU4** | 2 | 2 | 17.2 | 0.521058781 | 0.286417072 |  | 1.14 | AMB | AMNB | V-type proton ATPase proteolipid subunit OS=Sarcophilus harrisii OX=9305 GN=ATP6V0C PE=3 SV=1 |
| **G3VG35** | 3 | 3 | 38.1 | 0.249331422 | 0.161358979 |  | 1.14 | AMNB | AMB | Reticulon OS=Sarcophilus harrisii OX=9305 PE=4 SV=1 |
| **G3WYG7** | 5 | 4 | 39.6 | 0.409235288 | 0.235956325 |  | 1.14 | AMB | AMNB | Uncharacterized protein OS=Sarcophilus harrisii OX=9305 GN=COX5B PE=4 SV=1 |
| **G3VZL0** | 5 | 5 | 46.6 | 0.207585226 | 0.139282458 |  | 1.14 | AMNB | AMB | Dynactin subunit 2 OS=Sarcophilus harrisii OX=9305 GN=DCTN2 PE=4 SV=1 |
| **G3WJ20** | 7 | 5 | 46.2 | 0.011750541 | 0.015349616 | Anova p-value <= 0.05 | 1.14 | AMB | AMNB | Uncharacterized protein OS=Sarcophilus harrisii OX=9305 GN=LOC100924697 PE=4 SV=1 |
| **G3W0A0** | 2 | 2 | 15.2 | 0.096122297 | 0.079370867 |  | 1.14 | AMNB | AMB | GrpE protein homolog OS=Sarcophilus harrisii OX=9305 GN=GRPEL1 PE=3 SV=1 |
| **G3WI07** | 37 | 29 | 317 | 0.004380319 | 0.007576795 | Anova p-value <= 0.05 | 1.14 | AMB | AMNB | Heat shock protein family A (Hsp70) member 9 OS=Sarcophilus harrisii OX=9305 GN=HSPA9 PE=3 SV=1 |
| **G3VQ37** | 2 | 1 | 26.4 | 0.138987044 | 0.104124978 |  | 1.14 | AMB | AMNB | Phosphatidylinositol binding clathrin assembly protein OS=Sarcophilus harrisii OX=9305 GN=PICALM PE=4 SV=1 |
| **G3VF39** | 6 | 6 | 43.4 | 0.056214134 | 0.051533296 |  | 1.14 | AMB | AMNB | Uncharacterized protein OS=Sarcophilus harrisii OX=9305 GN=NAP1L4 PE=3 SV=1 |
| **G3WMV6** | 2 | 1 | 18.6 | 0.235759223 | 0.1548792 |  | 1.14 | AMNB | AMB | Src homology 2 domain containing E OS=Sarcophilus harrisii OX=9305 GN=SHE PE=4 SV=1 |
| **G3VVI1** | 8 | 1 | 119 | 0.02682784 | 0.029294326 | Anova p-value <= 0.05 | 1.14 | AMNB | AMB | Tubulin domain-containing protein OS=Sarcophilus harrisii OX=9305 PE=3 SV=1 |
| **G3WB53** | 7 | 7 | 58.2 | 0.076896485 | 0.066811782 |  | 1.14 | AMB | AMNB | Uncharacterized protein OS=Sarcophilus harrisii OX=9305 GN=ARHGDIA PE=4 SV=1 |
| **G3VLH9** | 1 | 1 | 5.63 | 0.110310232 | 0.087989817 |  | 1.14 | AMB | AMNB | Uncharacterized protein OS=Sarcophilus harrisii OX=9305 PE=3 SV=1 |
| **G3WMK0** | 3 | 2 | 19.5 | 0.19343144 | 0.13181855 |  | 1.14 | AMNB | AMB | Aldedh domain-containing protein OS=Sarcophilus harrisii OX=9305 GN=ALDH1B1 PE=3 SV=1 |
| **G3VPM9** | 42 | 32 | 394 | 0.001698696 | 0.003681313 | Anova p-value <= 0.05 | 1.14 | AMB | AMNB | AP-2 complex subunit alpha OS=Sarcophilus harrisii OX=9305 GN=AP2A2 PE=3 SV=1 |
| **G3X0E5** | 19 | 13 | 173 | 0.001428028 | 0.003314347 | Anova p-value <= 0.05 | 1.14 | AMB | AMNB | Heterogeneous nuclear ribonucleoprotein A2/B1 OS=Sarcophilus harrisii OX=9305 GN=HNRNPA2B1 PE=4 SV=1 |
| **G3WKN6** | 11 | 5 | 82.8 | 0.003585626 | 0.006438461 | Anova p-value <= 0.05 | 1.14 | AMNB | AMB | Heterogeneous nuclear ribonucleoprotein D like OS=Sarcophilus harrisii OX=9305 GN=HNRNPDL PE=4 SV=1 |
| **G3WEK2** | 79 | 24 | 840 | 0.026009318 | 0.028565991 | Anova p-value <= 0.05 | 1.14 | AMNB | AMB | Tubulin beta chain OS=Sarcophilus harrisii OX=9305 PE=3 SV=1 |
| **G3WC09** | 8 | 6 | 55.5 | 0.000668629 | 0.001890961 | Anova p-value <= 0.05 | 1.14 | AMB | AMNB | Coronin OS=Sarcophilus harrisii OX=9305 GN=CORO1A PE=3 SV=1 |
| **G3VA44** | 6 | 2 | 39.3 | 0.02261442 | 0.025484454 | Anova p-value <= 0.05 | 1.14 | AMNB | AMB | Uncharacterized protein OS=Sarcophilus harrisii OX=9305 GN=LOC100929704 PE=4 SV=1 |
| **G3WY59** | 36 | 4 | 238 | 0.034854907 | 0.035586209 | Anova p-value <= 0.05 | 1.14 | AMB | AMNB | Calcium-transporting ATPase OS=Sarcophilus harrisii OX=9305 GN=ATP2B2 PE=3 SV=1 |
| **G3WT06** | 13 | 3 | 84.4 | 0.03025305 | 0.032104766 | Anova p-value <= 0.05 | 1.14 | AMNB | AMB | Eukaryotic translation initiation factor 4A1 OS=Sarcophilus harrisii OX=9305 GN=EIF4A1 PE=3 SV=1 |
| **G3WW88** | 11 | 7 | 67.2 | 0.009098193 | 0.012833299 | Anova p-value <= 0.05 | 1.14 | AMNB | AMB | Transket_pyr domain-containing protein OS=Sarcophilus harrisii OX=9305 GN=OGDH PE=4 SV=1 |
| **G3X0S7** | 29 | 21 | 222 | 0.000487128 | 0.00152131 | Anova p-value <= 0.05 | 1.14 | AMB | AMNB | Aminopeptidase OS=Sarcophilus harrisii OX=9305 GN=NPEPPS PE=3 SV=1 |
| **G3VZ11** | 17 | 15 | 118 | 0.068552769 | 0.061081752 |  | 1.14 | AMNB | AMB | FERM domain-containing protein OS=Sarcophilus harrisii OX=9305 GN=EPB41L3 PE=4 SV=1 |
| **G3VQG1** | 12 | 5 | 117 | 0.131305974 | 0.099240568 |  | 1.14 | AMB | AMNB | Cofilin 2 OS=Sarcophilus harrisii OX=9305 GN=CFL2 PE=3 SV=1 |
| **G3VNK7** | 2 | 1 | 14.4 | 0.208173108 | 0.139511413 |  | 1.14 | AMNB | AMB | MFS domain-containing protein OS=Sarcophilus harrisii OX=9305 PE=4 SV=1 |
| **G3WNA9** | 2 | 1 | 12.1 | 0.828385723 | 0.408148565 |  | 1.14 | AMNB | AMB | Uncharacterized protein OS=Sarcophilus harrisii OX=9305 PE=4 SV=1 |
| **G3W0A8** | 10 | 6 | 66.1 | 0.013187269 | 0.01679962 | Anova p-value <= 0.05 | 1.14 | AMB | AMNB | Kinesin motor domain-containing protein OS=Sarcophilus harrisii OX=9305 GN=KIF5A PE=3 SV=1 |
| **G3WA53** | 3 | 2 | 16.9 | 0.15898709 | 0.114849115 |  | 1.14 | AMB | AMNB | RGS domain-containing protein OS=Sarcophilus harrisii OX=9305 GN=RGS1 PE=4 SV=1 |
| **G3W8R6** | 3 | 2 | 17.6 | 0.303254788 | 0.188761543 |  | 1.13 | AMNB | AMB | VWFA domain-containing protein OS=Sarcophilus harrisii OX=9305 PE=4 SV=1 |
| **G3W680** | 41 | 34 | 406 | 0.0501109 | 0.047556896 |  | 1.13 | AMB | AMNB | Glutamate dehydrogenase OS=Sarcophilus harrisii OX=9305 PE=3 SV=1 |
| **G3VLF4** | 3 | 3 | 17.3 | 0.116507805 | 0.091532421 |  | 1.13 | AMNB | AMB | Serine/threonine-protein phosphatase OS=Sarcophilus harrisii OX=9305 GN=PPP5C PE=3 SV=1 |
| **G3WLC7** | 20 | 1 | 135 | 0.167010202 | 0.118803484 |  | 1.13 | AMB | AMNB | Heat shock protein family A (Hsp70) member 4 OS=Sarcophilus harrisii OX=9305 GN=HSPA4 PE=3 SV=1 |
| **G3WE76** | 1 | 1 | 15.6 | 0.150742756 | 0.110654163 |  | 1.13 | AMB | AMNB | Uncharacterized protein OS=Sarcophilus harrisii OX=9305 PE=4 SV=1 |
| **G3WDD3** | 6 | 4 | 45.4 | 0.566094344 | 0.303216237 |  | 1.13 | AMB | AMNB | Uncharacterized protein OS=Sarcophilus harrisii OX=9305 PE=4 SV=1 |
| **G3WHT0** | 6 | 2 | 48.5 | 0.116455839 | 0.091532421 |  | 1.13 | AMB | AMNB | Tropomyosin 3 OS=Sarcophilus harrisii OX=9305 GN=TPM3 PE=3 SV=1 |
| **G3WK07** | 12 | 5 | 90.8 | 0.199601011 | 0.135208444 |  | 1.13 | AMB | AMNB | Serine/threonine-protein phosphatase OS=Sarcophilus harrisii OX=9305 GN=PPP1CC PE=3 SV=1 |
| **G3VAY5** | 4 | 2 | 26.3 | 0.094918112 | 0.078491124 |  | 1.13 | AMB | AMNB | Dynein light chain OS=Sarcophilus harrisii OX=9305 GN=LOC100926477 PE=3 SV=1 |
| **G3W5Q4** | 6 | 3 | 38.2 | 0.063992636 | 0.057636541 |  | 1.13 | AMNB | AMB | IF rod domain-containing protein OS=Sarcophilus harrisii OX=9305 GN=KRT24 PE=3 SV=1 |
| **G3W2A6** | 2 | 2 | 16.9 | 0.000445221 | 0.00147751 | Anova p-value <= 0.05 | 1.13 | AMB | AMNB | ANK_REP_REGION domain-containing protein OS=Sarcophilus harrisii OX=9305 PE=4 SV=1 |
| **G3WGP2** | 1 | 1 | 5.12 | 0.827892035 | 0.408148565 |  | 1.13 | AMB | AMNB | High mobility group box 2 OS=Sarcophilus harrisii OX=9305 GN=HMGB2 PE=4 SV=1 |
| **G3VM96** | 18 | 13 | 200 | 0.007027943 | 0.010713667 | Anova p-value <= 0.05 | 1.13 | AMB | AMNB | Septin 7 OS=Sarcophilus harrisii OX=9305 GN=SEPT7 PE=3 SV=1 |
| **G3WNS3** | 11 | 7 | 73.1 | 0.009335647 | 0.013102885 | Anova p-value <= 0.05 | 1.13 | AMNB | AMB | MICOS complex subunit MIC60 OS=Sarcophilus harrisii OX=9305 PE=3 SV=1 |
| **G3WR91** | 3 | 2 | 21.9 | 0.005356377 | 0.00878172 | Anova p-value <= 0.05 | 1.13 | AMNB | AMB | Homeobox domain-containing protein OS=Sarcophilus harrisii OX=9305 GN=PHOX2B PE=4 SV=1 |
| **G3WEC6** | 2 | 2 | 10.8 | 0.027224762 | 0.029613402 | Anova p-value <= 0.05 | 1.13 | AMNB | AMB | Monoglyceride lipase OS=Sarcophilus harrisii OX=9305 GN=MGLL PE=4 SV=1 |
| **G3VRA3** | 8 | 5 | 45.9 | 0.189674136 | 0.130357444 |  | 1.13 | AMB | AMNB | Uncharacterized protein OS=Sarcophilus harrisii OX=9305 GN=HADH PE=4 SV=1 |
| **G3WKJ1** | 11 | 7 | 79.3 | 0.141979704 | 0.106085968 |  | 1.13 | AMB | AMNB | AAA domain-containing protein OS=Sarcophilus harrisii OX=9305 GN=CHTF18 PE=4 SV=1 |
| **G3WT13** | 15 | 4 | 127 | 0.625658271 | 0.329197313 |  | 1.13 | AMNB | AMB | RAB3C_ member RAS oncogene family OS=Sarcophilus harrisii OX=9305 GN=RAB3C PE=4 SV=1 |
| **G3VY46** | 8 | 7 | 56.8 | 0.47442832 | 0.266482498 |  | 1.13 | AMB | AMNB | Eukaryotic translation initiation factor 5A OS=Sarcophilus harrisii OX=9305 GN=EIF5A PE=3 SV=1 |
| **G3VSV3** | 1 | 1 | 4.78 | 0.608891515 | 0.322730221 |  | 1.13 | AMB | AMNB | Proteasome endopeptidase complex OS=Sarcophilus harrisii OX=9305 GN=PSMA6 PE=3 SV=1 |
| **G3W9H5** | 2 | 1 | 12.5 | 0.564767947 | 0.302792516 |  | 1.13 | AMB | AMNB | Dolichyl-diphosphooligosaccharide--protein glycosyltransferase subunit DAD1 OS=Sarcophilus harrisii OX=9305 GN=DAD1 PE=3 SV=1 |
| **G3WLN8** | 14 | 7 | 101 | 0.030786744 | 0.032590974 | Anova p-value <= 0.05 | 1.13 | AMNB | AMB | Uncharacterized protein OS=Sarcophilus harrisii OX=9305 GN=NAPG PE=4 SV=1 |
| **G3VCD7** | 2 | 2 | 9.33 | 0.168497258 | 0.119480387 |  | 1.13 | AMB | AMNB | Uncharacterized protein OS=Sarcophilus harrisii OX=9305 PE=4 SV=1 |
| **G3VB41** | 9 | 7 | 62 | 0.24052424 | 0.157124258 |  | 1.13 | AMB | AMNB | Serine/threonine-protein phosphatase 2A activator OS=Sarcophilus harrisii OX=9305 GN=PTPA PE=3 SV=1 |
| **G3VL11** | 4 | 4 | 29.3 | 0.181939171 | 0.12611409 |  | 1.12 | AMNB | AMB | Drebrin like OS=Sarcophilus harrisii OX=9305 GN=DBNL PE=4 SV=1 |
| **G3W698** | 5 | 3 | 36.8 | 0.002527254 | 0.00488559 | Anova p-value <= 0.05 | 1.12 | AMB | AMNB | RRM domain-containing protein OS=Sarcophilus harrisii OX=9305 GN=RBMX PE=4 SV=1 |
| **G3W2B9** | 3 | 2 | 17.6 | 0.284639498 | 0.179886961 |  | 1.12 | AMB | AMNB | Serine/threonine-protein phosphatase OS=Sarcophilus harrisii OX=9305 GN=PPP6C PE=3 SV=1 |
| **G3W7P3** | 4 | 2 | 28.2 | 0.046550546 | 0.044629615 | Anova p-value <= 0.05 | 1.12 | AMNB | AMB | Slu7 domain-containing protein OS=Sarcophilus harrisii OX=9305 GN=SLU7 PE=4 SV=1 |
| **G3VM09** | 12 | 8 | 87.7 | 0.093102186 | 0.077215246 |  | 1.12 | AMNB | AMB | Synaptosome associated protein 91 OS=Sarcophilus harrisii OX=9305 GN=SNAP91 PE=4 SV=1 |
| **G3VI20** | 8 | 4 | 72.9 | 0.026486361 | 0.02903355 | Anova p-value <= 0.05 | 1.12 | AMNB | AMB | Uncharacterized protein OS=Sarcophilus harrisii OX=9305 GN=LOC100926337 PE=4 SV=1 |
| **G3WUN5** | 6 | 4 | 32.3 | 0.075702629 | 0.06601275 |  | 1.12 | AMNB | AMB | Aa_trans domain-containing protein OS=Sarcophilus harrisii OX=9305 GN=SLC32A1 PE=4 SV=1 |
| **G3WD32** | 9 | 9 | 102 | 0.023490116 | 0.026258034 | Anova p-value <= 0.05 | 1.12 | AMB | AMNB | Platelet activating factor acetylhydrolase 1b catalytic subunit 2 OS=Sarcophilus harrisii OX=9305 GN=PAFAH1B2 PE=4 SV=1 |
| **G3VNU1** | 4 | 4 | 23.1 | 0.076479783 | 0.06655196 |  | 1.12 | AMNB | AMB | T-box 3 OS=Sarcophilus harrisii OX=9305 GN=TBX3 PE=4 SV=1 |
| **G3WY09** | 8 | 5 | 49.3 | 0.079161468 | 0.068464217 |  | 1.12 | AMNB | AMB | Adenosylhomocysteinase OS=Sarcophilus harrisii OX=9305 GN=AHCY PE=3 SV=1 |
| **G3VUT8** | 9 | 2 | 67.6 | 0.135658223 | 0.101901061 |  | 1.12 | AMNB | AMB | RRM domain-containing protein OS=Sarcophilus harrisii OX=9305 GN=CIRBP PE=4 SV=1 |
| **G3VUT7** | 8 | 1 | 63.4 | 0.135658223 | 0.101901061 |  | 1.12 | AMNB | AMB | RRM domain-containing protein OS=Sarcophilus harrisii OX=9305 GN=CIRBP PE=4 SV=1 |
| **G3WY90** | 3 | 2 | 19 | 0.130512673 | 0.098955836 |  | 1.12 | AMNB | AMB | NADH:ubiquinone oxidoreductase subunit B5 OS=Sarcophilus harrisii OX=9305 GN=NDUFB5 PE=4 SV=1 |
| **G3VAQ9** | 4 | 2 | 31.3 | 0.643958003 | 0.336323059 |  | 1.12 | AMB | AMNB | Uncharacterized protein OS=Sarcophilus harrisii OX=9305 PE=4 SV=1 |
| **G3WAP8** | 2 | 2 | 19.6 | 0.103612409 | 0.083489293 |  | 1.12 | AMB | AMNB | Uncharacterized protein OS=Sarcophilus harrisii OX=9305 PE=4 SV=1 |
| **G3WL68** | 12 | 10 | 95.1 | 0.008579639 | 0.012254663 | Anova p-value <= 0.05 | 1.12 | AMNB | AMB | Dimethylarginine dimethylaminohydrolase 1 OS=Sarcophilus harrisii OX=9305 GN=DDAH1 PE=4 SV=1 |
| **G3VQL3** | 11 | 10 | 68 | 0.165104486 | 0.11791288 |  | 1.12 | AMB | AMNB | T-complex protein 1 subunit eta OS=Sarcophilus harrisii OX=9305 GN=CCT7 PE=3 SV=1 |
| **G3VEB8** | 2 | 2 | 11.5 | 0.401930279 | 0.232931629 |  | 1.12 | AMB | AMNB | Uncharacterized protein OS=Sarcophilus harrisii OX=9305 GN=LOC100923548 PE=4 SV=1 |
| **G3WWQ0** | 1 | 1 | 6.49 | 0.486029475 | 0.272457645 |  | 1.12 | AMB | AMNB | Uncharacterized protein OS=Sarcophilus harrisii OX=9305 GN=ERG28 PE=4 SV=1 |
| **G3VV35** | 3 | 3 | 22.1 | 0.363371901 | 0.216577175 |  | 1.12 | AMB | AMNB | Uncharacterized protein OS=Sarcophilus harrisii OX=9305 GN=GNA11 PE=4 SV=1 |
| **G3VTR7** | 31 | 13 | 189 | 0.319593523 | 0.195426652 |  | 1.12 | AMNB | AMB | Calcium-transporting ATPase OS=Sarcophilus harrisii OX=9305 GN=ATP2B3 PE=3 SV=1 |
| **G3WUI8** | 6 | 4 | 32.9 | 0.15991323 | 0.115223827 |  | 1.12 | AMB | AMNB | Polypyrimidine tract binding protein 2 OS=Sarcophilus harrisii OX=9305 GN=PTBP2 PE=4 SV=1 |
| **G3VLP0** | 18 | 7 | 145 | 0.004620093 | 0.00788906 | Anova p-value <= 0.05 | 1.12 | AMB | AMNB | Serine/threonine-protein phosphatase OS=Sarcophilus harrisii OX=9305 GN=PPP3CB PE=3 SV=1 |
| **G3VCM9** | 11 | 10 | 106 | 0.214152436 | 0.142673359 |  | 1.12 | AMB | AMNB | Peroxiredoxin OS=Sarcophilus harrisii OX=9305 GN=PRDX5 PE=3 SV=1 |
| **G3X2N8** | 6 | 5 | 33.3 | 0.113734007 | 0.089847268 |  | 1.12 | AMB | AMNB | Peptidyl-prolyl cis-trans isomerase OS=Sarcophilus harrisii OX=9305 GN=PPIB PE=3 SV=1 |
| **G3WE77** | 14 | 11 | 125 | 0.037991133 | 0.038100502 | Anova p-value <= 0.05 | 1.12 | AMNB | AMB | Microtubule associated protein RP/EB family member 3 OS=Sarcophilus harrisii OX=9305 GN=MAPRE3 PE=4 SV=1 |
| **G3VZU6** | 44 | 36 | 354 | 0.004430904 | 0.007640926 | Anova p-value <= 0.05 | 1.12 | AMNB | AMB | Tr-type G domain-containing protein OS=Sarcophilus harrisii OX=9305 GN=EEF2 PE=4 SV=1 |
| **G3WXF8** | 27 | 24 | 260 | 0.032044444 | 0.033548874 | Anova p-value <= 0.05 | 1.12 | AMB | AMNB | Peptidyl-prolyl cis-trans isomerase OS=Sarcophilus harrisii OX=9305 PE=3 SV=1 |
| **G3WYI8** | 29 | 17 | 296 | 0.291575643 | 0.18263796 |  | 1.12 | AMB | AMNB | Calcium/calmodulin dependent protein kinase II alpha OS=Sarcophilus harrisii OX=9305 GN=CAMK2A PE=3 SV=1 |
| **G3VIV2** | 4 | 3 | 62.2 | 0.121587388 | 0.094597939 |  | 1.12 | AMB | AMNB | CDGSH iron sulfur domain 1 OS=Sarcophilus harrisii OX=9305 GN=CISD1 PE=4 SV=1 |
| **Q0QEZ8** | 1 | 1 | 5.08 | 0.58556868 | 0.312293644 |  | 1.11 | AMB | AMNB | Succinate dehydrogenase [ubiquinone] iron-sulfur subunit_ mitochondrial (Fragment) OS=Sminthopsis douglasi OX=90758 GN=SDHB PE=2 SV=1 |
| **G3X3T5** | 5 | 4 | 26.9 | 0.108748506 | 0.086879557 |  | 1.11 | AMNB | AMB | Uncharacterized protein OS=Sarcophilus harrisii OX=9305 PE=4 SV=1 |
| **G3VGC4** | 7 | 3 | 57.1 | 0.032698086 | 0.034060425 | Anova p-value <= 0.05 | 1.11 | AMB | AMNB | Uncharacterized protein OS=Sarcophilus harrisii OX=9305 GN=RHOC PE=4 SV=1 |
| **G3WXU6** | 59 | 31 | 622 | 0.081085277 | 0.069496013 |  | 1.11 | AMNB | AMB | ATP synthase subunit alpha OS=Sarcophilus harrisii OX=9305 GN=ATP5F1A PE=3 SV=1 |
| **G3VKZ6** | 14 | 10 | 95.1 | 0.001100996 | 0.002707606 | Anova p-value <= 0.05 | 1.11 | AMB | AMNB | Oxoglutarate dehydrogenase like OS=Sarcophilus harrisii OX=9305 GN=OGDHL PE=4 SV=1 |
| **G3WTU7** | 19 | 15 | 169 | 0.02716774 | 0.029608316 | Anova p-value <= 0.05 | 1.11 | AMB | AMNB | Parkinsonism associated deglycase OS=Sarcophilus harrisii OX=9305 GN=PARK7 PE=4 SV=1 |
| **G3VZ31** | 26 | 16 | 240 | 0.005470549 | 0.00892635 | Anova p-value <= 0.05 | 1.11 | AMB | AMNB | Heat shock protein family A (Hsp70) member 1 like OS=Sarcophilus harrisii OX=9305 GN=HSPA1L PE=3 SV=1 |
| **G3W9G2** | 2 | 2 | 10.5 | 0.144906777 | 0.107562598 |  | 1.11 | AMNB | AMB | Uncharacterized protein OS=Sarcophilus harrisii OX=9305 GN=GMPS PE=4 SV=1 |
| **G3WAW3** | 2 | 1 | 13.6 | 0.155805887 | 0.113566358 |  | 1.11 | AMB | AMNB | Serine/threonine-protein phosphatase OS=Sarcophilus harrisii OX=9305 GN=PPP4C PE=3 SV=1 |
| **G3WQZ8** | 7 | 7 | 41 | 0.070446529 | 0.062357156 |  | 1.11 | AMB | AMNB | Phosphoglycerate dehydrogenase OS=Sarcophilus harrisii OX=9305 GN=PHGDH PE=4 SV=1 |
| **G3WIY5** | 15 | 2 | 122 | 0.146967141 | 0.108802377 |  | 1.11 | AMNB | AMB | Actin related protein 3 OS=Sarcophilus harrisii OX=9305 GN=ACTR3 PE=3 SV=1 |
| **G3X2I6** | 4 | 2 | 29.4 | 0.244250515 | 0.158702337 |  | 1.11 | AMB | AMNB | PPM-type phosphatase domain-containing protein OS=Sarcophilus harrisii OX=9305 GN=PPM1B PE=3 SV=1 |
| **G3WLW0** | 42 | 33 | 485 | 0.053892945 | 0.049972334 |  | 1.11 | AMB | AMNB | Fructose-bisphosphate aldolase OS=Sarcophilus harrisii OX=9305 GN=ALDOC PE=3 SV=1 |
| **G3WV40** | 3 | 2 | 16.4 | 0.101940684 | 0.082476742 |  | 1.11 | AMB | AMNB | CID domain-containing protein OS=Sarcophilus harrisii OX=9305 PE=4 SV=1 |
| **G3X1W7** | 17 | 8 | 118 | 0.013484313 | 0.017101 | Anova p-value <= 0.05 | 1.11 | AMB | AMNB | Succinate dehydrogenase [ubiquinone] flavoprotein subunit_ mitochondrial OS=Sarcophilus harrisii OX=9305 PE=3 SV=1 |
| **G3X0W3** | 64 | 54 | 677 | 0.195144661 | 0.132666387 |  | 1.11 | AMNB | AMB | Uncharacterized protein OS=Sarcophilus harrisii OX=9305 GN=STXBP1 PE=3 SV=1 |
| **G3VSV6** | 21 | 17 | 212 | 0.010556666 | 0.014082783 | Anova p-value <= 0.05 | 1.11 | AMNB | AMB | Synaptosomal-associated protein OS=Sarcophilus harrisii OX=9305 GN=SNAP25 PE=3 SV=1 |
| **G3VKT4** | 2 | 2 | 13.1 | 0.151730938 | 0.111169179 |  | 1.11 | AMNB | AMB | Cell adhesion molecule 3 OS=Sarcophilus harrisii OX=9305 GN=CADM3 PE=4 SV=1 |
| **G3VFU4** | 10 | 2 | 64 | 0.070696099 | 0.062480289 |  | 1.11 | AMB | AMNB | Pribosyltran_N domain-containing protein OS=Sarcophilus harrisii OX=9305 PE=4 SV=1 |
| **A0A1Z2TIW5** | 33 | 2 | 440 | 0.259969979 | 0.167096781 |  | 1.11 | AMB | AMNB | Actin beta (Fragment) OS=Sminthopsis crassicaudata OX=9301 GN=ACTB PE=2 SV=1 |
| **G3VKP4** | 4 | 3 | 23.7 | 0.779788483 | 0.391711194 |  | 1.11 | AMB | AMNB | Gap junction protein OS=Sarcophilus harrisii OX=9305 GN=GJA1 PE=3 SV=1 |
| **G3VRT2** | 13 | 9 | 96 | 0.043829014 | 0.042718973 | Anova p-value <= 0.05 | 1.11 | AMB | AMNB | C2 domain-containing protein OS=Sarcophilus harrisii OX=9305 GN=SYT12 PE=4 SV=1 |
| **G3WLZ6** | 21 | 16 | 218 | 0.00028793 | 0.001100406 | Anova p-value <= 0.05 | 1.11 | AMB | AMNB | Aspartate aminotransferase OS=Sarcophilus harrisii OX=9305 GN=GOT1 PE=4 SV=1 |
| **G3VWR9** | 6 | 4 | 47.4 | 0.371989631 | 0.219860116 |  | 1.11 | AMNB | AMB | Uncharacterized protein OS=Sarcophilus harrisii OX=9305 GN=PHPT1 PE=4 SV=1 |
| **G3WN96** | 20 | 17 | 152 | 0.274527597 | 0.175061218 |  | 1.11 | AMNB | AMB | V-type proton ATPase subunit H OS=Sarcophilus harrisii OX=9305 GN=ATP6V1H PE=3 SV=1 |
| **P80894** | 19 | 6 | 151 | 0.275108388 | 0.17523402 |  | 1.11 | AMNB | AMB | Glutathione S-transferase OS=Antechinus stuartii OX=9283 PE=1 SV=1 |
| **G3VUQ2** | 11 | 6 | 81.1 | 0.035948925 | 0.036440075 | Anova p-value <= 0.05 | 1.11 | AMB | AMNB | IF rod domain-containing protein OS=Sarcophilus harrisii OX=9305 GN=LOC100914752 PE=3 SV=1 |
| **G3WQF9** | 4 | 1 | 26.4 | 0.719767561 | 0.367766532 |  | 1.11 | AMB | AMNB | Family with sequence similarity 124 member A OS=Sarcophilus harrisii OX=9305 GN=FAM124A PE=4 SV=1 |
| **G3WJB4** | 12 | 10 | 77.7 | 0.143180364 | 0.106741986 |  | 1.11 | AMNB | AMB | Uncharacterized protein OS=Sarcophilus harrisii OX=9305 GN=FAM49B PE=4 SV=1 |
| **G3WDV3** | 11 | 10 | 69.7 | 0.061057217 | 0.055422216 |  | 1.11 | AMB | AMNB | Isocitrate dehydrogenase [NADP] OS=Sarcophilus harrisii OX=9305 GN=IDH2 PE=3 SV=1 |
| **G3VC49** | 21 | 17 | 222 | 0.014243827 | 0.017706912 | Anova p-value <= 0.05 | 1.11 | AMB | AMNB | Citrate synthase OS=Sarcophilus harrisii OX=9305 GN=CS PE=3 SV=1 |
| **G3WPJ6** | 7 | 1 | 65.6 | 0.383609483 | 0.225081529 |  | 1.11 | AMNB | AMB | Uncharacterized protein OS=Sarcophilus harrisii OX=9305 PE=3 SV=1 |
| **G3WGL7** | 1 | 1 | 5.78 | 0.533855706 | 0.291750155 |  | 1.11 | AMB | AMNB | Endothelin converting enzyme like 1 OS=Sarcophilus harrisii OX=9305 GN=ECEL1 PE=4 SV=1 |
| **G3VWS4** | 3 | 2 | 19.9 | 0.316945519 | 0.194405394 |  | 1.1 | AMB | AMNB | KRAS proto-oncogene_ GTPase OS=Sarcophilus harrisii OX=9305 GN=KRAS PE=4 SV=1 |
| **G3W8J9** | 46 | 37 | 512 | 0.014160497 | 0.017681042 | Anova p-value <= 0.05 | 1.1 | AMB | AMNB | Aconitate hydratase_ mitochondrial OS=Sarcophilus harrisii OX=9305 GN=ACO2 PE=3 SV=1 |
| **G3VK56** | 32 | 19 | 243 | 0.004601613 | 0.00788906 | Anova p-value <= 0.05 | 1.1 | AMB | AMNB | Sodium/potassium-transporting ATPase subunit alpha OS=Sarcophilus harrisii OX=9305 GN=ATP12A PE=3 SV=1 |
| **G3W9E5** | 14 | 8 | 96.9 | 0.086504011 | 0.072810586 |  | 1.1 | AMNB | AMB | Kinesin-like protein OS=Sarcophilus harrisii OX=9305 GN=KIF5C PE=3 SV=1 |
| **G3VFT3** | 21 | 17 | 147 | 0.128560123 | 0.097952603 |  | 1.1 | AMNB | AMB | Cullin associated and neddylation dissociated 1 OS=Sarcophilus harrisii OX=9305 GN=CAND1 PE=4 SV=1 |
| **G3WQB1** | 10 | 9 | 72.3 | 0.073646375 | 0.064784029 |  | 1.1 | AMNB | AMB | Purine rich element binding protein A OS=Sarcophilus harrisii OX=9305 GN=PURA PE=4 SV=1 |
| **G3W400** | 47 | 20 | 412 | 0.008527496 | 0.012254663 | Anova p-value <= 0.05 | 1.1 | AMB | AMNB | Clathrin heavy chain OS=Sarcophilus harrisii OX=9305 GN=CLTCL1 PE=3 SV=1 |
| **G3VKI9** | 17 | 16 | 166 | 0.116838128 | 0.091532421 |  | 1.1 | AMB | AMNB | Peroxiredoxin 6 OS=Sarcophilus harrisii OX=9305 GN=PRDX6 PE=4 SV=1 |
| **G3WB64** | 5 | 4 | 27.9 | 0.288657281 | 0.181537198 |  | 1.1 | AMNB | AMB | Protocadherin 7 OS=Sarcophilus harrisii OX=9305 GN=PCDH7 PE=4 SV=1 |
| **G3WZ30** | 10 | 9 | 97.9 | 0.046628102 | 0.044629615 | Anova p-value <= 0.05 | 1.1 | AMB | AMNB | Protein-L-isoaspartate (D-aspartate) O-methyltransferase OS=Sarcophilus harrisii OX=9305 GN=PCMT1 PE=4 SV=1 |
| **G3WB71** | 6 | 3 | 50 | 0.822208932 | 0.406234516 |  | 1.1 | AMNB | AMB | TPR_REGION domain-containing protein OS=Sarcophilus harrisii OX=9305 GN=CDC23 PE=4 SV=1 |
| **G3WPG0** | 12 | 6 | 117 | 0.045609788 | 0.044023847 | Anova p-value <= 0.05 | 1.1 | AMNB | AMB | Uncharacterized protein OS=Sarcophilus harrisii OX=9305 PE=3 SV=1 |
| **G3WXU1** | 17 | 12 | 162 | 0.170730609 | 0.120711586 |  | 1.1 | AMNB | AMB | Isocitrate dehydrogenase [NAD] subunit_ mitochondrial OS=Sarcophilus harrisii OX=9305 PE=3 SV=1 |
| **G3WJ53** | 2 | 2 | 13.1 | 0.538241715 | 0.293296956 |  | 1.1 | AMNB | AMB | ATP synthase subunit OS=Sarcophilus harrisii OX=9305 GN=ATP5MG PE=3 SV=1 |
| **G3WJX1** | 11 | 9 | 127 | 0.340008711 | 0.205247563 |  | 1.1 | AMNB | AMB | SHSP domain-containing protein OS=Sarcophilus harrisii OX=9305 GN=CRYAB PE=3 SV=1 |
| **G3WV83** | 4 | 3 | 30.7 | 0.098966954 | 0.081010202 |  | 1.1 | AMB | AMNB | Aldedh domain-containing protein OS=Sarcophilus harrisii OX=9305 PE=3 SV=1 |
| **G3X1L7** | 19 | 16 | 168 | 0.039617989 | 0.039244959 | Anova p-value <= 0.05 | 1.1 | AMB | AMNB | Dihydrolipoamide S-succinyltransferase OS=Sarcophilus harrisii OX=9305 GN=DLST PE=4 SV=1 |
| **G3VLK3** | 17 | 10 | 158 | 0.001842471 | 0.003932623 | Anova p-value <= 0.05 | 1.1 | AMB | AMNB | Uncharacterized protein OS=Sarcophilus harrisii OX=9305 GN=LOC100925341 PE=3 SV=1 |
| **G3WWZ6** | 3 | 1 | 33.5 | 0.012492506 | 0.016095801 | Anova p-value <= 0.05 | 1.1 | AMB | AMNB | Peptidyl-prolyl cis-trans isomerase OS=Sarcophilus harrisii OX=9305 GN=PPIF PE=3 SV=1 |
| **G3VWB5** | 8 | 3 | 72.6 | 0.000285049 | 0.001096804 | Anova p-value <= 0.05 | 1.1 | AMB | AMNB | RAB8A_ member RAS oncogene family OS=Sarcophilus harrisii OX=9305 GN=RAB8A PE=4 SV=1 |
| **G3WY58** | 34 | 3 | 220 | 0.007216043 | 0.010855226 | Anova p-value <= 0.05 | 1.1 | AMNB | AMB | Calcium-transporting ATPase OS=Sarcophilus harrisii OX=9305 GN=ATP2B2 PE=3 SV=1 |
| **G3W9A5** | 39 | 28 | 445 | 0.00975658 | 0.013525863 | Anova p-value <= 0.05 | 1.1 | AMB | AMNB | Pyruvate kinase OS=Sarcophilus harrisii OX=9305 PE=3 SV=1 |
| **G3WEN4** | 15 | 12 | 91 | 0.011985637 | 0.015513651 | Anova p-value <= 0.05 | 1.1 | AMB | AMNB | Uncharacterized protein OS=Sarcophilus harrisii OX=9305 GN=ACAT1 PE=3 SV=1 |
| **G3VFC6** | 3 | 2 | 24.6 | 0.012631327 | 0.016237675 | Anova p-value <= 0.05 | 1.1 | AMB | AMNB | Uncharacterized protein OS=Sarcophilus harrisii OX=9305 PE=4 SV=1 |
| **G3VG13** | 14 | 12 | 94.6 | 0.010013602 | 0.013731511 | Anova p-value <= 0.05 | 1.1 | AMB | AMNB | Amphiphysin OS=Sarcophilus harrisii OX=9305 GN=AMPH PE=4 SV=1 |
| **G3WAR2** | 1 | 1 | 6.04 | 0.303101169 | 0.188761543 |  | 1.1 | AMB | AMNB | Uncharacterized protein OS=Sarcophilus harrisii OX=9305 GN=CTBP1 PE=3 SV=1 |
| **G3WX69** | 18 | 13 | 118 | 0.027786712 | 0.030051283 | Anova p-value <= 0.05 | 1.1 | AMB | AMNB | RNA helicase aquarius OS=Sarcophilus harrisii OX=9305 GN=AQR PE=3 SV=1 |
| **G3X1E6** | 8 | 5 | 46.2 | 0.22615842 | 0.149614678 |  | 1.1 | AMNB | AMB | Karyopherin subunit beta 1 OS=Sarcophilus harrisii OX=9305 GN=KPNB1 PE=4 SV=1 |
| **G3WQ48** | 2 | 1 | 12.4 | 0.42836086 | 0.244738415 |  | 1.1 | AMB | AMNB | Uncharacterized protein OS=Sarcophilus harrisii OX=9305 PE=4 SV=1 |
| **G3WIH2** | 5 | 3 | 32.8 | 0.315061707 | 0.193702556 |  | 1.1 | AMB | AMNB | Leukotriene A(4) hydrolase OS=Sarcophilus harrisii OX=9305 GN=LTA4H PE=3 SV=1 |
| **G3WWQ3** | 14 | 9 | 97.2 | 0.246935503 | 0.160174954 |  | 1.1 | AMB | AMNB | Uncharacterized protein OS=Sarcophilus harrisii OX=9305 GN=NCDN PE=4 SV=1 |
| **G3WB21** | 11 | 10 | 72.9 | 0.152174107 | 0.111349641 |  | 1.1 | AMB | AMNB | Uncharacterized protein OS=Sarcophilus harrisii OX=9305 GN=ECHS1 PE=3 SV=1 |
| **G3WNI2** | 1 | 1 | 10.8 | 0.157105603 | 0.113888065 |  | 1.1 | AMB | AMNB | Carbonyl reductase 4 OS=Sarcophilus harrisii OX=9305 GN=CBR4 PE=4 SV=1 |
| **G3W281** | 68 | 36 | 841 | 0.289176411 | 0.181537198 |  | 1.1 | AMB | AMNB | Sodium/potassium-transporting ATPase subunit alpha OS=Sarcophilus harrisii OX=9305 GN=ATP1A3 PE=3 SV=1 |
| **G3WVC1** | 50 | 42 | 606 | 0.174738444 | 0.1224736 |  | 1.1 | AMB | AMNB | Uncharacterized protein OS=Sarcophilus harrisii OX=9305 GN=CKB PE=3 SV=1 |
| **G3VQW3** | 26 | 11 | 217 | 0.15334772 | 0.112063432 |  | 1.1 | AMNB | AMB | Elongation factor 1-alpha OS=Sarcophilus harrisii OX=9305 GN=EEF1A1 PE=3 SV=1 |
| **G3VZK5** | 18 | 12 | 159 | 0.049573918 | 0.047126353 | Anova p-value <= 0.05 | 1.1 | AMB | AMNB | Septin 6 OS=Sarcophilus harrisii OX=9305 GN=SEPT6 PE=3 SV=1 |
| **G3VF68** | 6 | 5 | 35.2 | 0.067996296 | 0.060758788 |  | 1.1 | AMB | AMNB | 60S acidic ribosomal protein P0 OS=Sarcophilus harrisii OX=9305 GN=RPLP0 PE=3 SV=1 |
| **G3WIF9** | 6 | 3 | 35.5 | 0.587758019 | 0.313041274 |  | 1.09 | AMB | AMNB | Kinesin-like protein OS=Sarcophilus harrisii OX=9305 PE=3 SV=1 |
| **G3WHE0** | 37 | 23 | 446 | 0.014129997 | 0.017681042 | Anova p-value <= 0.05 | 1.09 | AMB | AMNB | 14_3_3 domain-containing protein OS=Sarcophilus harrisii OX=9305 GN=YWHAZ PE=3 SV=1 |
| **G3VE56** | 5 | 3 | 44.1 | 0.387458025 | 0.226634354 |  | 1.09 | AMNB | AMB | Uncharacterized protein OS=Sarcophilus harrisii OX=9305 PE=3 SV=1 |
| **G3WCE0** | 5 | 4 | 32.5 | 0.177086975 | 0.123812831 |  | 1.09 | AMB | AMNB | DJ-1_PfpI domain-containing protein OS=Sarcophilus harrisii OX=9305 PE=4 SV=1 |
| **G3VQ11** | 11 | 9 | 131 | 0.005093758 | 0.008449121 | Anova p-value <= 0.05 | 1.09 | AMB | AMNB | Uncharacterized protein OS=Sarcophilus harrisii OX=9305 GN=TPPP PE=4 SV=1 |
| **G3WX15** | 5 | 2 | 33.1 | 0.689204485 | 0.355360395 |  | 1.09 | AMNB | AMB | Secretory carrier-associated membrane protein OS=Sarcophilus harrisii OX=9305 GN=SCAMP1 PE=3 SV=1 |
| **G3VV40** | 6 | 5 | 44 | 0.12497549 | 0.096038483 |  | 1.09 | AMNB | AMB | Uncharacterized protein OS=Sarcophilus harrisii OX=9305 PE=4 SV=1 |
| **G3WJB6** | 15 | 11 | 120 | 0.396257483 | 0.230352109 |  | 1.09 | AMNB | AMB | Uncharacterized protein OS=Sarcophilus harrisii OX=9305 PE=3 SV=1 |
| **G3WK91** | 10 | 6 | 75.5 | 0.50610023 | 0.280924687 |  | 1.09 | AMB | AMNB | WH1 domain-containing protein OS=Sarcophilus harrisii OX=9305 GN=HOMER1 PE=4 SV=1 |
| **G3VDR7** | 15 | 9 | 175 | 0.145446297 | 0.107821579 |  | 1.09 | AMB | AMNB | Uncharacterized protein OS=Sarcophilus harrisii OX=9305 PE=4 SV=1 |
| **G3VAC5** | 2 | 1 | 10.9 | 0.094828755 | 0.078491124 |  | 1.09 | AMB | AMNB | Arrestin_C domain-containing protein OS=Sarcophilus harrisii OX=9305 GN=ARRB2 PE=4 SV=1 |
| **G3WIN4** | 31 | 1 | 293 | 0.124790023 | 0.096032908 |  | 1.09 | AMNB | AMB | Uncharacterized protein OS=Sarcophilus harrisii OX=9305 GN=ABAT PE=3 SV=1 |
| **G3WIN3** | 31 | 1 | 299 | 0.124790023 | 0.096032908 |  | 1.09 | AMNB | AMB | Uncharacterized protein OS=Sarcophilus harrisii OX=9305 GN=ABAT PE=3 SV=1 |
| **G3VLD4** | 3 | 3 | 17.2 | 0.01940657 | 0.022586038 | Anova p-value <= 0.05 | 1.09 | AMB | AMNB | Splicing regulatory glutamic acid and lysine rich protein 1 OS=Sarcophilus harrisii OX=9305 GN=SREK1 PE=4 SV=1 |
| **G3W2L0** | 36 | 28 | 373 | 0.003966981 | 0.006925364 | Anova p-value <= 0.05 | 1.09 | AMB | AMNB | Malate dehydrogenase OS=Sarcophilus harrisii OX=9305 GN=MDH1 PE=3 SV=1 |
| **G3WPD7** | 10 | 2 | 111 | 0.467362362 | 0.264087116 |  | 1.09 | AMB | AMNB | IF rod domain-containing protein OS=Sarcophilus harrisii OX=9305 GN=LOC100916049 PE=3 SV=1 |
| **G3WF54** | 6 | 4 | 42.2 | 0.267830469 | 0.17117655 |  | 1.09 | AMB | AMNB | Fructose-bisphosphate aldolase OS=Sarcophilus harrisii OX=9305 GN=ALDOB PE=3 SV=1 |
| **G3VHM7** | 6 | 4 | 36.4 | 0.135954144 | 0.101987903 |  | 1.09 | AMNB | AMB | Cysteine rich protein 2 OS=Sarcophilus harrisii OX=9305 GN=CRIP2 PE=4 SV=1 |
| **G3VU42** | 11 | 8 | 97.3 | 0.118949595 | 0.093057681 |  | 1.09 | AMNB | AMB | Profilin OS=Sarcophilus harrisii OX=9305 GN=PFN1 PE=3 SV=1 |
| **G3VK12** | 5 | 3 | 39.6 | 0.328129665 | 0.199997734 |  | 1.09 | AMNB | AMB | UTP--glucose-1-phosphate uridylyltransferase OS=Sarcophilus harrisii OX=9305 GN=UGP2 PE=3 SV=1 |
| **G3WAF5** | 2 | 1 | 13.6 | 0.648030497 | 0.337826149 |  | 1.09 | AMNB | AMB | Integrator complex subunit 3 OS=Sarcophilus harrisii OX=9305 GN=INTS3 PE=4 SV=1 |
| **G3VTL1** | 9 | 2 | 95.2 | 0.123869265 | 0.095653857 |  | 1.09 | AMNB | AMB | IF rod domain-containing protein OS=Sarcophilus harrisii OX=9305 GN=KRT4 PE=3 SV=1 |
| **G3VAH3** | 12 | 3 | 104 | 0.121089535 | 0.094340364 |  | 1.09 | AMB | AMNB | Adaptor related protein complex 2 subunit alpha 1 OS=Sarcophilus harrisii OX=9305 GN=AP2A1 PE=4 SV=1 |
| **G3X2M5** | 5 | 2 | 27.5 | 0.261023858 | 0.16758373 |  | 1.09 | AMB | AMNB | Oxidation resistance 1 OS=Sarcophilus harrisii OX=9305 GN=OXR1 PE=4 SV=1 |
| **G3WF93** | 3 | 2 | 23.2 | 0.434810017 | 0.247423367 |  | 1.09 | AMNB | AMB | GDP-mannose pyrophosphorylase A OS=Sarcophilus harrisii OX=9305 GN=GMPPA PE=4 SV=1 |
| **G3WU83** | 3 | 1 | 15.5 | 0.591070196 | 0.313624089 |  | 1.09 | AMNB | AMB | Uncharacterized protein OS=Sarcophilus harrisii OX=9305 GN=RAB29 PE=4 SV=1 |
| **G3WGB5** | 8 | 7 | 54.9 | 0.009976739 | 0.013731511 | Anova p-value <= 0.05 | 1.09 | AMNB | AMB | Protein phosphatase methylesterase 1 OS=Sarcophilus harrisii OX=9305 GN=PPME1 PE=3 SV=1 |
| **G3VS70** | 2 | 2 | 12.2 | 0.165441958 | 0.118004897 |  | 1.09 | AMNB | AMB | Uncharacterized protein OS=Sarcophilus harrisii OX=9305 GN=GDAP1 PE=3 SV=1 |
| **G3W4H0** | 8 | 3 | 41.9 | 0.125400955 | 0.096110766 |  | 1.09 | AMNB | AMB | Uncharacterized protein OS=Sarcophilus harrisii OX=9305 GN=PHEX PE=4 SV=1 |
| **G3W694** | 27 | 19 | 261 | 0.17423598 | 0.122434942 |  | 1.09 | AMNB | AMB | Synaptotagmin 1 OS=Sarcophilus harrisii OX=9305 GN=SYT1 PE=4 SV=1 |
| **G3VP43** | 35 | 27 | 314 | 0.002915946 | 0.005337631 | Anova p-value <= 0.05 | 1.09 | AMB | AMNB | Hexokinase 1 OS=Sarcophilus harrisii OX=9305 GN=HK1 PE=3 SV=1 |
| **G3WAE7** | 4 | 2 | 23.5 | 0.309849336 | 0.191538919 |  | 1.09 | AMNB | AMB | Carboxypeptidase N subunit 1 OS=Sarcophilus harrisii OX=9305 GN=CPN1 PE=4 SV=1 |
| **G3VT88** | 5 | 3 | 35.5 | 0.297017101 | 0.185635243 |  | 1.09 | AMNB | AMB | Proteasome endopeptidase complex OS=Sarcophilus harrisii OX=9305 PE=3 SV=1 |
| **G3WYN9** | 3 | 2 | 17.4 | 0.373674314 | 0.22062529 |  | 1.08 | AMNB | AMB | RAP1 GTPase activating protein OS=Sarcophilus harrisii OX=9305 GN=RAP1GAP PE=4 SV=1 |
| **G3W270** | 22 | 2 | 245 | 0.312752396 | 0.192725836 |  | 1.08 | AMNB | AMB | ATP synthase subunit alpha OS=Sarcophilus harrisii OX=9305 PE=3 SV=1 |
| **G3X0D5** | 21 | 18 | 206 | 0.056638395 | 0.051838213 |  | 1.08 | AMB | AMNB | Isocitrate dehydrogenase [NAD] subunit_ mitochondrial OS=Sarcophilus harrisii OX=9305 GN=IDH3A PE=3 SV=1 |
| **G3VRW3** | 13 | 12 | 82.8 | 0.55263782 | 0.297829058 |  | 1.08 | AMB | AMNB | Annexin OS=Sarcophilus harrisii OX=9305 GN=ANXA5 PE=3 SV=1 |
| **G3WPR9** | 6 | 3 | 36.7 | 0.003158402 | 0.005744266 | Anova p-value <= 0.05 | 1.08 | AMB | AMNB | Solute carrier family 4 member 1 adaptor protein OS=Sarcophilus harrisii OX=9305 GN=SLC4A1AP PE=4 SV=1 |
| **G3W8L9** | 6 | 2 | 29.6 | 0.303354084 | 0.188761543 |  | 1.08 | AMNB | AMB | Uncharacterized protein OS=Sarcophilus harrisii OX=9305 GN=MYH2 PE=3 SV=1 |
| **G3VMW8** | 37 | 31 | 397 | 0.000366767 | 0.001288523 | Anova p-value <= 0.05 | 1.08 | AMB | AMNB | Glucose-6-phosphate isomerase OS=Sarcophilus harrisii OX=9305 GN=GPI PE=3 SV=1 |
| **G3W9T1** | 2 | 2 | 13.3 | 0.706808844 | 0.362126626 |  | 1.08 | AMB | AMNB | Glutaredoxin domain-containing protein OS=Sarcophilus harrisii OX=9305 GN=GLRX PE=4 SV=1 |
| **G3WYG4** | 7 | 5 | 49.2 | 0.147669474 | 0.108998446 |  | 1.08 | AMB | AMNB | Heterogeneous nuclear ribonucleoprotein U OS=Sarcophilus harrisii OX=9305 GN=HNRNPU PE=4 SV=1 |
| **G3VR15** | 6 | 5 | 49.8 | 0.350544703 | 0.210708154 |  | 1.08 | AMB | AMNB | Prohibitin OS=Sarcophilus harrisii OX=9305 GN=PHB PE=4 SV=1 |
| **G3X091** | 11 | 8 | 86.1 | 0.122367407 | 0.094979633 |  | 1.08 | AMB | AMNB | Phos_pyr_kin domain-containing protein OS=Sarcophilus harrisii OX=9305 GN=PDXK PE=4 SV=1 |
| **G3W5J9** | 9 | 6 | 65.4 | 0.154842608 | 0.113009858 |  | 1.08 | AMNB | AMB | Tubulin gamma complex associated protein 6 OS=Sarcophilus harrisii OX=9305 GN=TUBGCP6 PE=4 SV=1 |
| **G3WHS6** | 2 | 2 | 10.7 | 0.306612037 | 0.189952922 |  | 1.08 | AMNB | AMB | Uncharacterized protein OS=Sarcophilus harrisii OX=9305 GN=RPL32 PE=4 SV=1 |
| **G3WWT0** | 1 | 1 | 6 | 0.509390733 | 0.281645594 |  | 1.08 | AMNB | AMB | MARVEL domain-containing protein OS=Sarcophilus harrisii OX=9305 GN=MAL2 PE=4 SV=1 |
| **G3VER7** | 6 | 2 | 43.9 | 0.50780028 | 0.281320409 |  | 1.08 | AMB | AMNB | RAB12_ member RAS oncogene family OS=Sarcophilus harrisii OX=9305 GN=RAB12 PE=4 SV=1 |
| **G3WUQ2** | 9 | 6 | 54.7 | 0.321094952 | 0.196132718 |  | 1.08 | AMB | AMNB | Adenylyl cyclase-associated protein OS=Sarcophilus harrisii OX=9305 GN=CAP2 PE=3 SV=1 |
| **G3WC16** | 8 | 5 | 51.8 | 0.352302397 | 0.211539879 |  | 1.08 | AMB | AMNB | Uncharacterized protein OS=Sarcophilus harrisii OX=9305 PE=3 SV=1 |
| **G3X0F5** | 3 | 3 | 18.9 | 0.035711007 | 0.036281343 | Anova p-value <= 0.05 | 1.08 | AMNB | AMB | HP domain-containing protein OS=Sarcophilus harrisii OX=9305 PE=4 SV=1 |
| **G3WQ76** | 9 | 7 | 47.1 | 0.006623835 | 0.010236606 | Anova p-value <= 0.05 | 1.08 | AMB | AMNB | Gse1 coiled-coil protein OS=Sarcophilus harrisii OX=9305 GN=GSE1 PE=4 SV=1 |
| **G3WT05** | 41 | 16 | 312 | 0.433206046 | 0.246876555 |  | 1.08 | AMB | AMNB | UBA_e1_C domain-containing protein OS=Sarcophilus harrisii OX=9305 PE=3 SV=1 |
| **G3WDF0** | 5 | 1 | 29.5 | 0.331475755 | 0.20138617 |  | 1.08 | AMNB | AMB | Non-specific serine/threonine protein kinase OS=Sarcophilus harrisii OX=9305 GN=PAK2 PE=3 SV=1 |
| **G3VAY2** | 3 | 1 | 20.1 | 0.548216442 | 0.296731275 |  | 1.08 | AMNB | AMB | Uncharacterized protein OS=Sarcophilus harrisii OX=9305 GN=LOC100928454 PE=4 SV=1 |
| **G3VE53** | 24 | 14 | 279 | 0.469477057 | 0.26501729 |  | 1.08 | AMB | AMNB | Tyrosine 3-monooxygenase/tryptophan 5-monooxygenase activation protein eta OS=Sarcophilus harrisii OX=9305 GN=YWHAH PE=3 SV=1 |
| **G3VT47** | 1 | 1 | 5.78 | 0.335186925 | 0.202986778 |  | 1.08 | AMNB | AMB | Glycine cleavage system H protein OS=Sarcophilus harrisii OX=9305 PE=3 SV=1 |
| **G3WUW7** | 7 | 4 | 38.4 | 0.543950972 | 0.294987087 |  | 1.08 | AMNB | AMB | Rho GTPase activating protein 1 OS=Sarcophilus harrisii OX=9305 GN=ARHGAP1 PE=4 SV=1 |
| **G3VA81** | 3 | 3 | 17.8 | 0.539047329 | 0.293453239 |  | 1.08 | AMNB | AMB | Uncharacterized protein OS=Sarcophilus harrisii OX=9305 PE=4 SV=1 |
| **G3VDS6** | 1 | 1 | 6.84 | 0.371450357 | 0.219810507 |  | 1.08 | AMB | AMNB | Mothers against decapentaplegic homolog OS=Sarcophilus harrisii OX=9305 GN=SMAD9 PE=3 SV=1 |
| **G3VHM9** | 6 | 3 | 57.6 | 0.150832379 | 0.110654163 |  | 1.08 | AMNB | AMB | Guanine nucleotide-binding protein subunit gamma OS=Sarcophilus harrisii OX=9305 GN=GNG12 PE=3 SV=1 |
| **G3VYJ6** | 15 | 13 | 101 | 0.159706148 | 0.115221395 |  | 1.08 | AMNB | AMB | Uncharacterized protein OS=Sarcophilus harrisii OX=9305 GN=METTL25 PE=4 SV=1 |
| **G3WDW7** | 4 | 3 | 31.2 | 0.368281668 | 0.218811785 |  | 1.08 | AMB | AMNB | Uncharacterized protein OS=Sarcophilus harrisii OX=9305 PE=4 SV=1 |
| **G3W6J9** | 3 | 2 | 24.4 | 0.256931177 | 0.165519759 |  | 1.08 | AMB | AMNB | Galactosamine (N-acetyl)-6-sulfatase OS=Sarcophilus harrisii OX=9305 GN=GALNS PE=4 SV=1 |
| **G3W570** | 16 | 6 | 158 | 0.277471407 | 0.176144095 |  | 1.08 | AMB | AMNB | Uncharacterized protein OS=Sarcophilus harrisii OX=9305 GN=NAPB PE=4 SV=1 |
| **G3WZS7** | 41 | 33 | 430 | 0.060454627 | 0.054975188 |  | 1.08 | AMNB | AMB | Uncharacterized protein OS=Sarcophilus harrisii OX=9305 GN=HSPD1 PE=3 SV=1 |
| **G3W6B0** | 5 | 3 | 24.6 | 0.266375773 | 0.170439407 |  | 1.08 | AMB | AMNB | Uncharacterized protein OS=Sarcophilus harrisii OX=9305 GN=PIKFYVE PE=4 SV=1 |
| **G3VXL7** | 9 | 8 | 66 | 0.507807868 | 0.281320409 |  | 1.08 | AMNB | AMB | RanBD1 domain-containing protein OS=Sarcophilus harrisii OX=9305 PE=4 SV=1 |
| **G3WI12** | 11 | 8 | 77.1 | 0.785058592 | 0.392962569 |  | 1.08 | AMB | AMNB | Uncharacterized protein OS=Sarcophilus harrisii OX=9305 GN=RBM25 PE=4 SV=1 |
| **G3WHI5** | 7 | 6 | 47.8 | 0.190311424 | 0.1306367 |  | 1.08 | AMB | AMNB | G_PROTEIN_RECEP_F3_4 domain-containing protein OS=Sarcophilus harrisii OX=9305 GN=CASR PE=3 SV=1 |
| **G3W840** | 7 | 4 | 44.4 | 0.343838513 | 0.206897014 |  | 1.08 | AMNB | AMB | SR-related CTD associated factor 11 OS=Sarcophilus harrisii OX=9305 GN=SCAF11 PE=4 SV=1 |
| **G3WJ35** | 9 | 7 | 54.6 | 0.129641696 | 0.098559689 |  | 1.08 | AMB | AMNB | Aldedh domain-containing protein OS=Sarcophilus harrisii OX=9305 GN=ALDH7A1 PE=3 SV=1 |
| **G3VAF2** | 10 | 6 | 52.8 | 0.081972186 | 0.069846624 |  | 1.07 | AMNB | AMB | Uncharacterized protein OS=Sarcophilus harrisii OX=9305 GN=KDM2A PE=4 SV=1 |
| **G3WS97** | 14 | 9 | 117 | 0.081643266 | 0.069846624 |  | 1.07 | AMNB | AMB | Brevican OS=Sarcophilus harrisii OX=9305 GN=BCAN PE=4 SV=1 |
| **G3WYB6** | 3 | 3 | 24.4 | 0.487389568 | 0.272679588 |  | 1.07 | AMNB | AMB | WD_REPEATS_REGION domain-containing protein OS=Sarcophilus harrisii OX=9305 GN=GNB5 PE=4 SV=1 |
| **G3WTM6** | 12 | 10 | 109 | 0.312025745 | 0.192673733 |  | 1.07 | AMNB | AMB | Cytochrome c oxidase subunit 5A OS=Sarcophilus harrisii OX=9305 GN=COX5A PE=4 SV=1 |
| **G3WIY4** | 13 | 1 | 110 | 0.275520469 | 0.175299091 |  | 1.07 | AMNB | AMB | Actin related protein 3 OS=Sarcophilus harrisii OX=9305 GN=ACTR3 PE=3 SV=1 |
| **G3WQW1** | 7 | 4 | 34.9 | 0.224704834 | 0.148827128 |  | 1.07 | AMB | AMNB | Uncharacterized protein OS=Sarcophilus harrisii OX=9305 GN=MYH7 PE=3 SV=1 |
| **G3WRE1** | 4 | 1 | 29.7 | 0.091452973 | 0.076294932 |  | 1.07 | AMB | AMNB | Uncharacterized protein OS=Sarcophilus harrisii OX=9305 PE=4 SV=1 |
| **G3VR61** | 14 | 4 | 103 | 0.40278676 | 0.233189064 |  | 1.07 | AMB | AMNB | ATPase H+ transporting V1 subunit B1 OS=Sarcophilus harrisii OX=9305 GN=ATP6V1B1 PE=4 SV=1 |
| **G3WNI0** | 4 | 3 | 29.3 | 0.433122449 | 0.246876555 |  | 1.07 | AMB | AMNB | t-SNARE coiled-coil homology domain-containing protein OS=Sarcophilus harrisii OX=9305 GN=STX7 PE=3 SV=1 |
| **G3W323** | 1 | 1 | 11.7 | 0.384995952 | 0.225427344 |  | 1.07 | AMNB | AMB | Homeobox domain-containing protein OS=Sarcophilus harrisii OX=9305 PE=4 SV=1 |
| **G3WJE1** | 4 | 1 | 44.4 | 0.539603684 | 0.293473657 |  | 1.07 | AMB | AMNB | V-SNARE coiled-coil homology domain-containing protein OS=Sarcophilus harrisii OX=9305 PE=4 SV=1 |
| **G3VZC3** | 2 | 2 | 11.7 | 0.883996405 | 0.425902273 |  | 1.07 | AMNB | AMB | FoP_duplication domain-containing protein OS=Sarcophilus harrisii OX=9305 PE=4 SV=1 |
| **G3W8X9** | 4 | 3 | 31.4 | 0.157250998 | 0.113888065 |  | 1.07 | AMB | AMNB | Hypoxia up-regulated 1 OS=Sarcophilus harrisii OX=9305 GN=HYOU1 PE=3 SV=1 |
| **G3VDC9** | 2 | 2 | 9.92 | 0.12863461 | 0.097952603 |  | 1.07 | AMNB | AMB | Uncharacterized protein OS=Sarcophilus harrisii OX=9305 GN=RPLP2 PE=3 SV=1 |
| **G3WP04** | 25 | 21 | 329 | 0.035227841 | 0.035902162 | Anova p-value <= 0.05 | 1.07 | AMB | AMNB | 14_3_3 domain-containing protein OS=Sarcophilus harrisii OX=9305 GN=YWHAE PE=3 SV=1 |
| **G3WUY4** | 4 | 2 | 24.4 | 0.304867015 | 0.189480516 |  | 1.07 | AMNB | AMB | Uncharacterized protein OS=Sarcophilus harrisii OX=9305 PE=3 SV=1 |
| **G3VLI9** | 24 | 20 | 233 | 0.36092392 | 0.215492434 |  | 1.07 | AMNB | AMB | Fascin actin-bundling protein 1 OS=Sarcophilus harrisii OX=9305 GN=FSCN1 PE=4 SV=1 |
| **G3VSQ1** | 2 | 2 | 9.58 | 0.817599293 | 0.404950518 |  | 1.07 | AMB | AMNB | Dihydrouridine synthase 1 like OS=Sarcophilus harrisii OX=9305 GN=DUS1L PE=4 SV=1 |
| **G3VJ15** | 2 | 1 | 12 | 0.436247763 | 0.24799201 |  | 1.07 | AMNB | AMB | Uncharacterized protein OS=Sarcophilus harrisii OX=9305 PE=4 SV=1 |
| **G3VAB6** | 1 | 1 | 3.73 | 0.703119721 | 0.360890326 |  | 1.07 | AMB | AMNB | Mitochondrial fission 1 protein OS=Sarcophilus harrisii OX=9305 GN=FIS1 PE=3 SV=1 |
| **G3VR44** | 3 | 2 | 18.2 | 0.629431996 | 0.330296034 |  | 1.07 | AMB | AMNB | MAGE domain-containing protein OS=Sarcophilus harrisii OX=9305 PE=4 SV=1 |
| **G3WVZ0** | 6 | 5 | 41.8 | 0.447362408 | 0.254054976 |  | 1.07 | AMNB | AMB | EF-hand domain-containing protein OS=Sarcophilus harrisii OX=9305 PE=4 SV=1 |
| **G3VPK2** | 12 | 1 | 110 | 0.251982486 | 0.162516821 |  | 1.07 | AMNB | AMB | Uncharacterized protein OS=Sarcophilus harrisii OX=9305 GN=SCRN1 PE=4 SV=1 |
| **G3WUN2** | 47 | 36 | 550 | 0.031691111 | 0.033298405 | Anova p-value <= 0.05 | 1.07 | AMB | AMNB | Uncharacterized protein OS=Sarcophilus harrisii OX=9305 GN=ENO2 PE=3 SV=1 |
| **A7LAP0** | 11 | 2 | 130 | 0.000252925 | 0.001014611 | Anova p-value <= 0.05 | 1.07 | AMNB | AMB | Shell coat protein 4 (Fragment) OS=Sminthopsis macroura OX=9302 PE=2 SV=1 |
| **G3W4G2** | 1 | 1 | 5.97 | 0.743955065 | 0.377059656 |  | 1.07 | AMB | AMNB | Negative elongation factor complex member E OS=Sarcophilus harrisii OX=9305 GN=NELFE PE=4 SV=1 |
| **G3WE89** | 18 | 11 | 148 | 0.123959241 | 0.095653857 |  | 1.07 | AMNB | AMB | Septin-type G domain-containing protein OS=Sarcophilus harrisii OX=9305 PE=3 SV=1 |
| **G3VJU6** | 3 | 3 | 21.2 | 0.238892226 | 0.156573687 |  | 1.07 | AMNB | AMB | Uncharacterized protein OS=Sarcophilus harrisii OX=9305 PE=4 SV=1 |
| **G3VPU2** | 24 | 17 | 230 | 0.178985615 | 0.124831684 |  | 1.07 | AMB | AMNB | Protein kinase C and casein kinase substrate in neurons 1 OS=Sarcophilus harrisii OX=9305 GN=PACSIN1 PE=4 SV=1 |
| **M1QZF7** | 4 | 1 | 44.4 | 0.131414565 | 0.099240568 |  | 1.07 | AMNB | AMB | Sodium/potassium-transporting ATPase subunit alpa-like protein (Fragment) OS=Dasyurus geoffroii OX=63143 GN=ATP1A PE=4 SV=1 |
| **G3VW25** | 23 | 22 | 207 | 0.589383133 | 0.313253321 |  | 1.07 | AMB | AMNB | Succinate--CoA ligase [ADP-forming] subunit beta_ mitochondrial OS=Sarcophilus harrisii OX=9305 GN=SUCLA2 PE=3 SV=1 |
| **G3VBE2** | 2 | 1 | 10.7 | 0.557816266 | 0.300203682 |  | 1.07 | AMB | AMNB | Uncharacterized protein OS=Sarcophilus harrisii OX=9305 GN=LOC100922742 PE=3 SV=1 |
| **G3W1L9** | 9 | 8 | 47.1 | 0.119363525 | 0.09325253 |  | 1.07 | AMB | AMNB | Nuclear autoantigenic sperm protein OS=Sarcophilus harrisii OX=9305 GN=NASP PE=4 SV=1 |
| **G3X042** | 3 | 1 | 18.3 | 0.485259083 | 0.272295646 |  | 1.07 | AMNB | AMB | Uncharacterized protein OS=Sarcophilus harrisii OX=9305 GN=RAP2B PE=4 SV=1 |
| **G3WS05** | 5 | 5 | 29.6 | 0.289171674 | 0.181537198 |  | 1.07 | AMB | AMNB | Actin-related protein 2/3 complex subunit 4 OS=Sarcophilus harrisii OX=9305 GN=ARPC4 PE=3 SV=1 |
| **G3WK19** | 3 | 3 | 22.2 | 0.638727961 | 0.33420873 |  | 1.06 | AMNB | AMB | NADH dehydrogenase [ubiquinone] 1 alpha subcomplex subunit 12 OS=Sarcophilus harrisii OX=9305 GN=NDUFA12 PE=3 SV=1 |
| **G3VG21** | 2 | 2 | 18.9 | 0.536084873 | 0.292685598 |  | 1.06 | AMNB | AMB | Uncharacterized protein OS=Sarcophilus harrisii OX=9305 PE=3 SV=1 |
| **G3WVT4** | 12 | 10 | 93 | 0.060392 | 0.054975188 |  | 1.06 | AMB | AMNB | Tropomodulin 2 OS=Sarcophilus harrisii OX=9305 GN=TMOD2 PE=4 SV=1 |
| **G3VTE6** | 9 | 7 | 71 | 0.413550502 | 0.237235236 |  | 1.06 | AMNB | AMB | Myelin oligodendrocyte glycoprotein OS=Sarcophilus harrisii OX=9305 GN=MOG PE=4 SV=1 |
| **G3VS43** | 29 | 16 | 350 | 0.552796306 | 0.297829058 |  | 1.06 | AMB | AMNB | Tyrosine 3-monooxygenase/tryptophan 5-monooxygenase activation protein theta OS=Sarcophilus harrisii OX=9305 GN=YWHAQ PE=3 SV=1 |
| **G3W5M4** | 14 | 10 | 135 | 0.052900563 | 0.049539419 |  | 1.06 | AMB | AMNB | Destrin_ actin depolymerizing factor OS=Sarcophilus harrisii OX=9305 GN=DSTN PE=3 SV=1 |
| **G3VIB4** | 2 | 1 | 12.7 | 0.633667822 | 0.331868058 |  | 1.06 | AMNB | AMB | Uncharacterized protein OS=Sarcophilus harrisii OX=9305 PE=4 SV=1 |
| **G3W1H3** | 7 | 6 | 36.1 | 0.064757799 | 0.058048403 |  | 1.06 | AMB | AMNB | Uncharacterized protein OS=Sarcophilus harrisii OX=9305 GN=DAAM1 PE=4 SV=1 |
| **G3VM01** | 17 | 4 | 131 | 0.547900258 | 0.296731275 |  | 1.06 | AMB | AMNB | FERM domain-containing protein OS=Sarcophilus harrisii OX=9305 GN=RDX PE=4 SV=1 |
| **G3VVH8** | 20 | 6 | 158 | 0.099993406 | 0.081382786 |  | 1.06 | AMNB | AMB | AdoHcyase_NAD domain-containing protein OS=Sarcophilus harrisii OX=9305 GN=AHCYL1 PE=3 SV=1 |
| **G3W7X1** | 23 | 11 | 173 | 0.110449361 | 0.087989817 |  | 1.06 | AMNB | AMB | AdoHcyase_NAD domain-containing protein OS=Sarcophilus harrisii OX=9305 GN=AHCYL2 PE=3 SV=1 |
| **G3WYE6** | 8 | 1 | 53 | 0.501100713 | 0.278422801 |  | 1.06 | AMB | AMNB | Actin related protein 1B OS=Sarcophilus harrisii OX=9305 GN=ACTR1B PE=3 SV=1 |
| **G3VA84** | 4 | 3 | 23.3 | 0.212429425 | 0.142027312 |  | 1.06 | AMB | AMNB | Coronin OS=Sarcophilus harrisii OX=9305 GN=CORO1C PE=3 SV=1 |
| **G3W4W5** | 3 | 2 | 17 | 0.188312283 | 0.12957893 |  | 1.06 | AMB | AMNB | H6 family homeobox 1 OS=Sarcophilus harrisii OX=9305 GN=HMX1 PE=4 SV=1 |
| **G3VW34** | 25 | 22 | 247 | 0.084603274 | 0.071637144 |  | 1.06 | AMB | AMNB | Synapsin II OS=Sarcophilus harrisii OX=9305 GN=SYN2 PE=4 SV=1 |
| **G3VTQ2** | 14 | 13 | 93.5 | 0.36936482 | 0.219190787 |  | 1.06 | AMNB | AMB | Solute carrier family 25 member 11 OS=Sarcophilus harrisii OX=9305 GN=SLC25A11 PE=3 SV=1 |
| **G3WIB8** | 3 | 3 | 25 | 0.699644408 | 0.359759473 |  | 1.06 | AMNB | AMB | Uncharacterized protein OS=Sarcophilus harrisii OX=9305 GN=UQCRQ PE=4 SV=1 |
| **G3WTY0** | 10 | 4 | 59.4 | 0.526891623 | 0.289061455 |  | 1.06 | AMB | AMNB | Cytoplasmic FMR1-interacting protein OS=Sarcophilus harrisii OX=9305 GN=CYFIP2 PE=3 SV=1 |
| **G3WCJ6** | 33 | 18 | 363 | 0.001977573 | 0.004112361 | Anova p-value <= 0.05 | 1.06 | AMNB | AMB | 14_3_3 domain-containing protein OS=Sarcophilus harrisii OX=9305 GN=YWHAB PE=3 SV=1 |
| **G3VFV0** | 1 | 1 | 21.3 | 0.488007163 | 0.272686936 |  | 1.06 | AMB | AMNB | ATP-synt_DE_N domain-containing protein OS=Sarcophilus harrisii OX=9305 PE=4 SV=1 |
| **G3VH16** | 7 | 5 | 49.6 | 0.391298392 | 0.228408279 |  | 1.06 | AMB | AMNB | Uncharacterized protein OS=Sarcophilus harrisii OX=9305 PE=3 SV=1 |
| **G3WBF4** | 2 | 2 | 17.1 | 0.338840216 | 0.204760724 |  | 1.06 | AMNB | AMB | Ribosomal_L7Ae domain-containing protein OS=Sarcophilus harrisii OX=9305 GN=LOC100932434 PE=3 SV=1 |
| **G3VJY5** | 6 | 2 | 45.1 | 0.07571464 | 0.06601275 |  | 1.06 | AMB | AMNB | Unc-45 myosin chaperone B OS=Sarcophilus harrisii OX=9305 GN=UNC45B PE=4 SV=1 |
| **G3VJA1** | 4 | 2 | 33.2 | 0.856249632 | 0.418234057 |  | 1.06 | AMB | AMNB | Glycoprotein M6B OS=Sarcophilus harrisii OX=9305 GN=GPM6B PE=4 SV=1 |
| **G3VBN2** | 15 | 11 | 105 | 0.123598568 | 0.095636488 |  | 1.06 | AMB | AMNB | Discs large MAGUK scaffold protein 3 OS=Sarcophilus harrisii OX=9305 GN=DLG3 PE=3 SV=1 |
| **G3WR40** | 3 | 3 | 17 | 0.198005219 | 0.134449501 |  | 1.06 | AMB | AMNB | Uncharacterized protein OS=Sarcophilus harrisii OX=9305 GN=NDUFB10 PE=4 SV=1 |
| **G3W357** | 5 | 4 | 29.2 | 0.300290292 | 0.18747383 |  | 1.06 | AMB | AMNB | Uncharacterized protein OS=Sarcophilus harrisii OX=9305 GN=DHX9 PE=4 SV=1 |
| **G3W2D7** | 12 | 10 | 102 | 0.174250368 | 0.122434942 |  | 1.05 | AMB | AMNB | Uncharacterized protein OS=Sarcophilus harrisii OX=9305 GN=ATP6V1E1 PE=3 SV=1 |
| **G3X1J6** | 16 | 10 | 161 | 0.551858958 | 0.297829058 |  | 1.05 | AMNB | AMB | Uncharacterized protein OS=Sarcophilus harrisii OX=9305 PE=4 SV=1 |
| **G3WZK6** | 2 | 2 | 13.1 | 0.38849023 | 0.227003368 |  | 1.05 | AMNB | AMB | Uncharacterized protein OS=Sarcophilus harrisii OX=9305 PE=4 SV=1 |
| **G3WDP3** | 23 | 1 | 136 | 0.213917261 | 0.142673359 |  | 1.05 | AMB | AMNB | Kinesin family member 26A OS=Sarcophilus harrisii OX=9305 GN=KIF26A PE=3 SV=1 |
| **G3WU76** | 6 | 5 | 35.2 | 0.361170947 | 0.215492434 |  | 1.05 | AMB | AMNB | Pep3_Vps18 domain-containing protein OS=Sarcophilus harrisii OX=9305 GN=VPS18 PE=4 SV=1 |
| **G3WA80** | 13 | 7 | 71.7 | 0.064114235 | 0.057654256 |  | 1.05 | AMNB | AMB | Zinc finger CCCH-type containing 13 OS=Sarcophilus harrisii OX=9305 GN=ZC3H13 PE=4 SV=1 |
| **G3WHB9** | 1 | 1 | 7.14 | 0.895306839 | 0.429522237 |  | 1.05 | AMB | AMNB | Tetraspanin OS=Sarcophilus harrisii OX=9305 GN=TSPAN7 PE=3 SV=1 |
| **G3WVC8** | 6 | 5 | 29.4 | 0.530189552 | 0.290307596 |  | 1.05 | AMB | AMNB | LRRCT domain-containing protein OS=Sarcophilus harrisii OX=9305 GN=LGI1 PE=4 SV=1 |
| **G3WFK2** | 24 | 2 | 376 | 0.244384649 | 0.158702337 |  | 1.05 | AMB | AMNB | Tubulin alpha chain OS=Sarcophilus harrisii OX=9305 GN=TUBA8 PE=3 SV=1 |
| **G3X2Y2** | 8 | 2 | 65.6 | 0.377262193 | 0.222279601 |  | 1.05 | AMB | AMNB | Pyruvate dehydrogenase E1 component subunit beta OS=Sarcophilus harrisii OX=9305 PE=4 SV=1 |
| **G3VN74** | 4 | 1 | 33 | 0.882919942 | 0.425902273 |  | 1.05 | AMB | AMNB | IF rod domain-containing protein OS=Sarcophilus harrisii OX=9305 GN=KRT13 PE=3 SV=1 |
| **G3VDV6** | 1 | 1 | 6.19 | 0.684707901 | 0.353491121 |  | 1.05 | AMNB | AMB | PCI domain-containing protein OS=Sarcophilus harrisii OX=9305 GN=PSMD12 PE=4 SV=1 |
| **G3X212** | 15 | 13 | 135 | 0.244107916 | 0.158702337 |  | 1.05 | AMNB | AMB | Adenylate kinase isoenzyme 1 OS=Sarcophilus harrisii OX=9305 GN=AK1 PE=3 SV=1 |
| **G3WW07** | 25 | 19 | 230 | 0.199229523 | 0.13511862 |  | 1.05 | AMB | AMNB | Glutaminase OS=Sarcophilus harrisii OX=9305 GN=GLS PE=3 SV=1 |
| **A0A0R5PSQ9** | 1 | 1 | 8.84 | 0.722044754 | 0.368533535 |  | 1.05 | AMB | AMNB | Apolipoprotein B (Fragment) OS=Sminthopsis macroura OX=9302 GN=ApoB PE=4 SV=1 |
| **G3WR33** | 9 | 6 | 52.4 | 0.38454402 | 0.225396052 |  | 1.05 | AMNB | AMB | Uncharacterized protein OS=Sarcophilus harrisii OX=9305 PE=4 SV=1 |
| **G3VCP8** | 9 | 2 | 84 | 0.50091576 | 0.278422801 |  | 1.05 | AMB | AMNB | Uncharacterized protein OS=Sarcophilus harrisii OX=9305 PE=4 SV=1 |
| **G3WS29** | 31 | 22 | 309 | 0.14065149 | 0.105232551 |  | 1.05 | AMB | AMNB | Collapsin response mediator protein 1 OS=Sarcophilus harrisii OX=9305 GN=CRMP1 PE=4 SV=1 |
| **G3WYF5** | 6 | 4 | 42.5 | 0.380471361 | 0.223472064 |  | 1.05 | AMNB | AMB | Transket_pyr domain-containing protein OS=Sarcophilus harrisii OX=9305 PE=4 SV=1 |
| **G3WL72** | 12 | 5 | 119 | 0.508974834 | 0.281645594 |  | 1.05 | AMNB | AMB | IF rod domain-containing protein OS=Sarcophilus harrisii OX=9305 GN=KRT7 PE=3 SV=1 |
| **G3W3C8** | 6 | 2 | 55.4 | 0.542667554 | 0.294856484 |  | 1.05 | AMNB | AMB | IF rod domain-containing protein OS=Sarcophilus harrisii OX=9305 GN=LOC100933149 PE=3 SV=1 |
| **G3VKZ3** | 2 | 1 | 9.38 | 0.981856186 | 0.456985579 |  | 1.05 | AMB | AMNB | Ubiquitin conjugating enzyme E2 L3 OS=Sarcophilus harrisii OX=9305 GN=UBE2L3 PE=3 SV=1 |
| **G3WQY4** | 4 | 4 | 28 | 0.412254166 | 0.237070097 |  | 1.05 | AMNB | AMB | Uncharacterized protein OS=Sarcophilus harrisii OX=9305 PE=4 SV=1 |
| **G3W2M4** | 8 | 6 | 45.8 | 0.472112809 | 0.266039967 |  | 1.05 | AMNB | AMB | Neuronal cell adhesion molecule OS=Sarcophilus harrisii OX=9305 GN=NRCAM PE=4 SV=1 |
| **G3VYZ2** | 1 | 1 | 6.88 | 0.629498303 | 0.330296034 |  | 1.05 | AMB | AMNB | HGH1 homolog OS=Sarcophilus harrisii OX=9305 GN=HGH1 PE=4 SV=1 |
| **G3WP85** | 12 | 10 | 85.9 | 0.248080875 | 0.160733573 |  | 1.05 | AMNB | AMB | Phytanoyl-CoA 2-hydroxylase interacting protein like OS=Sarcophilus harrisii OX=9305 GN=PHYHIPL PE=4 SV=1 |
| **G3W7W1** | 6 | 6 | 34.2 | 0.279980352 | 0.177537564 |  | 1.05 | AMNB | AMB | Uncharacterized protein OS=Sarcophilus harrisii OX=9305 PE=3 SV=1 |
| **G3VRD2** | 11 | 9 | 70.8 | 0.536701269 | 0.292739564 |  | 1.05 | AMNB | AMB | ATP-dependent 6-phosphofructokinase OS=Sarcophilus harrisii OX=9305 GN=PFKL PE=3 SV=1 |
| **G3WBJ4** | 34 | 24 | 298 | 0.377805606 | 0.222368141 |  | 1.05 | AMB | AMNB | ATP-dependent 6-phosphofructokinase OS=Sarcophilus harrisii OX=9305 PE=3 SV=1 |
| **G3WEL6** | 1 | 1 | 6.31 | 0.179924786 | 0.125332159 |  | 1.05 | AMNB | AMB | Vesicle amine transport 1 OS=Sarcophilus harrisii OX=9305 GN=VAT1 PE=4 SV=1 |
| **G3VWM2** | 19 | 15 | 122 | 0.412424371 | 0.237070097 |  | 1.04 | AMB | AMNB | Pyruvate carboxylase OS=Sarcophilus harrisii OX=9305 GN=PC PE=4 SV=1 |
| **G3VWD5** | 24 | 10 | 210 | 0.122413822 | 0.094979633 |  | 1.04 | AMNB | AMB | Dynamin 2 OS=Sarcophilus harrisii OX=9305 GN=DNM2 PE=3 SV=1 |
| **G3WY04** | 5 | 3 | 26 | 0.316302662 | 0.194254359 |  | 1.04 | AMNB | AMB | Uncharacterized protein OS=Sarcophilus harrisii OX=9305 GN=MPRIP PE=4 SV=1 |
| **G3W830** | 10 | 5 | 92.7 | 0.516099447 | 0.284458328 |  | 1.04 | AMB | AMNB | Uncharacterized protein OS=Sarcophilus harrisii OX=9305 GN=HNRNPA1 PE=4 SV=1 |
| **G3X3Q9** | 7 | 6 | 45.6 | 0.613333753 | 0.324220629 |  | 1.04 | AMNB | AMB | Aldehyde dehydrogenase 6 family member A1 OS=Sarcophilus harrisii OX=9305 GN=ALDH6A1 PE=4 SV=1 |
| **G3X0S9** | 7 | 5 | 66.1 | 0.186449817 | 0.128610274 |  | 1.04 | AMB | AMNB | Neuroplastin OS=Sarcophilus harrisii OX=9305 GN=NPTN PE=4 SV=1 |
| **G3WJT5** | 4 | 2 | 39.4 | 0.589817611 | 0.313253321 |  | 1.04 | AMNB | AMB | Uncharacterized protein OS=Sarcophilus harrisii OX=9305 PE=4 SV=1 |
| **G3WVY6** | 8 | 7 | 68.3 | 0.550971703 | 0.297829058 |  | 1.04 | AMB | AMNB | Uncharacterized protein OS=Sarcophilus harrisii OX=9305 GN=PPP2CA PE=3 SV=1 |
| **G3WNC0** | 8 | 8 | 122 | 0.417251402 | 0.238873744 |  | 1.04 | AMB | AMNB | Uncharacterized protein OS=Sarcophilus harrisii OX=9305 PE=4 SV=1 |
| **G3W5K4** | 23 | 5 | 336 | 0.665153723 | 0.345162086 |  | 1.04 | AMB | AMNB | Uncharacterized protein OS=Sarcophilus harrisii OX=9305 GN=ACTBL2 PE=3 SV=1 |
| **G3VU17** | 3 | 3 | 16.5 | 0.755139626 | 0.380993218 |  | 1.04 | AMB | AMNB | Uncharacterized protein OS=Sarcophilus harrisii OX=9305 PE=4 SV=1 |
| **G3VEY0** | 4 | 3 | 33.9 | 0.585802166 | 0.312293644 |  | 1.04 | AMB | AMNB | TCTP domain-containing protein OS=Sarcophilus harrisii OX=9305 PE=3 SV=1 |
| **G3WMF9** | 27 | 18 | 271 | 0.395581252 | 0.230195586 |  | 1.04 | AMNB | AMB | Uncharacterized protein OS=Sarcophilus harrisii OX=9305 GN=CKMT1A PE=3 SV=1 |
| **G3WY48** | 7 | 3 | 43.1 | 0.277245006 | 0.176144095 |  | 1.04 | AMB | AMNB | Uncharacterized protein OS=Sarcophilus harrisii OX=9305 GN=RAB43 PE=4 SV=1 |
| **G3W6B7** | 5 | 3 | 61.1 | 0.200662274 | 0.135764745 |  | 1.04 | AMB | AMNB | Uncharacterized protein OS=Sarcophilus harrisii OX=9305 PE=4 SV=1 |
| **G3WRF8** | 9 | 4 | 70.5 | 0.420585909 | 0.240539267 |  | 1.04 | AMB | AMNB | Septin-type G domain-containing protein OS=Sarcophilus harrisii OX=9305 PE=3 SV=1 |
| **G3W6S6** | 9 | 8 | 55.8 | 0.52817487 | 0.289484685 |  | 1.04 | AMB | AMNB | S-formylglutathione hydrolase OS=Sarcophilus harrisii OX=9305 GN=ESD PE=3 SV=1 |
| **G3WE18** | 2 | 2 | 11.4 | 0.807089189 | 0.40150284 |  | 1.04 | AMNB | AMB | Glyoxalase domain containing 4 OS=Sarcophilus harrisii OX=9305 GN=GLOD4 PE=4 SV=1 |
| **G3VF53** | 23 | 22 | 145 | 0.699553603 | 0.359759473 |  | 1.04 | AMB | AMNB | Annexin OS=Sarcophilus harrisii OX=9305 GN=ANXA6 PE=3 SV=1 |
| **G3WP18** | 4 | 1 | 20.4 | 0.465881102 | 0.263513367 |  | 1.04 | AMB | AMNB | Uncharacterized protein OS=Sarcophilus harrisii OX=9305 PE=4 SV=1 |
| **G3VKR1** | 10 | 6 | 64.7 | 0.609373174 | 0.322730221 |  | 1.04 | AMNB | AMB | Family with sequence similarity 83 member H OS=Sarcophilus harrisii OX=9305 GN=FAM83H PE=4 SV=1 |
| **G3WW63** | 27 | 15 | 207 | 0.202474921 | 0.136827482 |  | 1.04 | AMB | AMNB | Uncharacterized protein OS=Sarcophilus harrisii OX=9305 GN=HSPH1 PE=3 SV=1 |
| **G3WNY0** | 2 | 2 | 13.7 | 0.837099665 | 0.411646474 |  | 1.04 | AMB | AMNB | MARVEL domain-containing protein OS=Sarcophilus harrisii OX=9305 GN=PLLP PE=4 SV=1 |
| **G3W0D7** | 1 | 1 | 5.12 | 0.713093658 | 0.364685926 |  | 1.04 | AMB | AMNB | OBG-type G domain-containing protein OS=Sarcophilus harrisii OX=9305 GN=DRG2 PE=4 SV=1 |
| **G3VJ54** | 12 | 9 | 100 | 0.646242738 | 0.337204957 |  | 1.04 | AMNB | AMB | Transaldolase OS=Sarcophilus harrisii OX=9305 GN=TALDO1 PE=4 SV=1 |
| **G3VXE9** | 5 | 1 | 38.4 | 0.47269977 | 0.266039967 |  | 1.04 | AMNB | AMB | Uncharacterized protein OS=Sarcophilus harrisii OX=9305 PE=4 SV=1 |
| **G3WVY5** | 14 | 10 | 124 | 0.452406192 | 0.256147787 |  | 1.04 | AMNB | AMB | Serine/threonine-protein phosphatase OS=Sarcophilus harrisii OX=9305 GN=PPP2CA PE=3 SV=1 |
| **G3WDV8** | 19 | 15 | 163 | 0.075743429 | 0.06601275 |  | 1.04 | AMB | AMNB | Adducin 1 OS=Sarcophilus harrisii OX=9305 GN=ADD1 PE=4 SV=1 |
| **G3VNH8** | 10 | 7 | 126 | 0.330667581 | 0.201111185 |  | 1.04 | AMB | AMNB | Ubiquitin thioesterase OS=Sarcophilus harrisii OX=9305 PE=3 SV=1 |
| **G3X115** | 5 | 3 | 41.4 | 0.639334985 | 0.334217176 |  | 1.04 | AMB | AMNB | Peptidyl-prolyl cis-trans isomerase E OS=Sarcophilus harrisii OX=9305 GN=PPIE PE=3 SV=1 |
| **G3WSL0** | 9 | 6 | 62.2 | 0.571409514 | 0.305773635 |  | 1.04 | AMNB | AMB | Diacylglycerol kinase zeta OS=Sarcophilus harrisii OX=9305 GN=DGKZ PE=4 SV=1 |
| **G3VBA6** | 11 | 10 | 95.3 | 0.730774822 | 0.372381548 |  | 1.04 | AMB | AMNB | Uncharacterized protein OS=Sarcophilus harrisii OX=9305 GN=ATP5PO PE=3 SV=1 |
| **G3X3R2** | 3 | 2 | 18.8 | 0.975751649 | 0.454994398 |  | 1.04 | AMB | AMNB | Phosphoserine aminotransferase OS=Sarcophilus harrisii OX=9305 GN=PSAT1 PE=3 SV=1 |
| **G3VDU3** | 3 | 2 | 18.7 | 0.572515648 | 0.306075981 |  | 1.04 | AMB | AMNB | Cyclic nucleotide-binding domain-containing protein OS=Sarcophilus harrisii OX=9305 GN=CNGA1 PE=4 SV=1 |
| **G3VR95** | 13 | 10 | 116 | 0.401739859 | 0.232931629 |  | 1.03 | AMB | AMNB | Succinate--CoA ligase [ADP/GDP-forming] subunit alpha_ mitochondrial OS=Sarcophilus harrisii OX=9305 GN=SUCLG1 PE=3 SV=1 |
| **G3VYQ3** | 6 | 3 | 47.6 | 0.157253997 | 0.113888065 |  | 1.03 | AMNB | AMB | Uncharacterized protein OS=Sarcophilus harrisii OX=9305 PE=4 SV=1 |
| **G3X0Y9** | 13 | 11 | 128 | 0.491098563 | 0.273402519 |  | 1.03 | AMNB | AMB | ATP synthase subunit gamma OS=Sarcophilus harrisii OX=9305 GN=ATP5F1C PE=3 SV=1 |
| **G3W031** | 30 | 14 | 254 | 0.664045521 | 0.344903442 |  | 1.03 | AMB | AMNB | Uncharacterized protein OS=Sarcophilus harrisii OX=9305 PE=3 SV=1 |
| **G3X346** | 2 | 1 | 11.7 | 0.515519227 | 0.284458328 |  | 1.03 | AMNB | AMB | Uncharacterized protein OS=Sarcophilus harrisii OX=9305 PE=4 SV=1 |
| **G3WTV2** | 8 | 1 | 69.4 | 0.621085362 | 0.327136574 |  | 1.03 | AMNB | AMB | WD_REPEATS_REGION domain-containing protein OS=Sarcophilus harrisii OX=9305 GN=GNB3 PE=4 SV=1 |
| **G3WP61** | 5 | 3 | 28.4 | 0.610593852 | 0.323074201 |  | 1.03 | AMB | AMNB | 3-hydroxyisobutyryl-CoA hydrolase_ mitochondrial OS=Sarcophilus harrisii OX=9305 GN=HIBCH PE=3 SV=1 |
| **G3W1I5** | 5 | 5 | 39 | 0.735372922 | 0.37438732 |  | 1.03 | AMB | AMNB | Phosphatidylinositol-5-phosphate 4-kinase type 2 gamma OS=Sarcophilus harrisii OX=9305 GN=PIP4K2C PE=4 SV=1 |
| **G3VWL6** | 3 | 2 | 16.9 | 0.910314213 | 0.435245345 |  | 1.03 | AMNB | AMB | Uncharacterized protein OS=Sarcophilus harrisii OX=9305 PE=4 SV=1 |
| **G3WHL8** | 3 | 2 | 16.6 | 0.898525336 | 0.430700997 |  | 1.03 | AMB | AMNB | Striatin OS=Sarcophilus harrisii OX=9305 GN=STRN PE=4 SV=1 |
| **G3X2H7** | 4 | 2 | 25.3 | 0.999708247 | 0.458737749 |  | 1.03 | AMB | AMNB | RAB35_ member RAS oncogene family OS=Sarcophilus harrisii OX=9305 GN=RAB35 PE=4 SV=1 |
| **G3WMU8** | 8 | 5 | 56 | 0.80030781 | 0.399182558 |  | 1.03 | AMB | AMNB | Uncharacterized protein OS=Sarcophilus harrisii OX=9305 PE=4 SV=1 |
| **G3VF84** | 6 | 4 | 37.2 | 0.760387564 | 0.382985918 |  | 1.03 | AMNB | AMB | Myosin XVI OS=Sarcophilus harrisii OX=9305 GN=MYO16 PE=3 SV=1 |
| **G3W3B8** | 10 | 4 | 81.2 | 0.684954159 | 0.353491121 |  | 1.03 | AMNB | AMB | Pyruvate kinase OS=Sarcophilus harrisii OX=9305 GN=PKLR PE=3 SV=1 |
| **G3VXL4** | 11 | 6 | 75.8 | 0.559109604 | 0.3006137 |  | 1.03 | AMB | AMNB | S-(hydroxymethyl)glutathione dehydrogenase OS=Sarcophilus harrisii OX=9305 GN=ADH5 PE=3 SV=1 |
| **O46444** | 4 | 2 | 36.2 | 0.866274322 | 0.42131147 |  | 1.03 | AMB | AMNB | Phosphoglycerate kinase (Fragment) OS=Dasyurus albopunctatus OX=32545 GN=PGK-1 PE=4 SV=1 |
| **G3WEC7** | 11 | 10 | 65.9 | 0.318072834 | 0.194707268 |  | 1.03 | AMB | AMNB | Uncharacterized protein OS=Sarcophilus harrisii OX=9305 PE=4 SV=1 |
| **G3WXZ6** | 5 | 3 | 31.5 | 0.706282947 | 0.362126626 |  | 1.03 | AMNB | AMB | Exocyst complex component 7 OS=Sarcophilus harrisii OX=9305 GN=EXOC7 PE=3 SV=1 |
| **G3W0X5** | 4 | 3 | 23.8 | 0.515250079 | 0.284458328 |  | 1.03 | AMNB | AMB | COP9 signalosome subunit 4 OS=Sarcophilus harrisii OX=9305 GN=COPS4 PE=4 SV=1 |
| **G3VUH5** | 25 | 13 | 265 | 0.191884357 | 0.131080108 |  | 1.03 | AMB | AMNB | Uncharacterized protein OS=Sarcophilus harrisii OX=9305 GN=ENO3 PE=3 SV=1 |
| **G3WM45** | 42 | 32 | 410 | 0.403938005 | 0.233377821 |  | 1.03 | AMB | AMNB | Amidohydro-rel domain-containing protein OS=Sarcophilus harrisii OX=9305 GN=DPYSL3 PE=4 SV=1 |
| **G3WLV3** | 18 | 1 | 273 | 0.620587633 | 0.327136574 |  | 1.03 | AMNB | AMB | Uncharacterized protein OS=Sarcophilus harrisii OX=9305 GN=MBP PE=4 SV=1 |
| **G3WLV2** | 31 | 13 | 289 | 0.620587633 | 0.327136574 |  | 1.03 | AMNB | AMB | Uncharacterized protein OS=Sarcophilus harrisii OX=9305 GN=MBP PE=4 SV=1 |
| **G3VW61** | 1 | 1 | 5.21 | 0.707676106 | 0.36224284 |  | 1.03 | AMB | AMNB | Myosin light chain 3 OS=Sarcophilus harrisii OX=9305 GN=MYL3 PE=4 SV=1 |
| **G3VVI3** | 10 | 6 | 73.8 | 0.392355351 | 0.228553516 |  | 1.03 | AMB | AMNB | Kinesin-like protein OS=Sarcophilus harrisii OX=9305 GN=KIF5B PE=3 SV=1 |
| **G3WKI0** | 35 | 22 | 263 | 0.784318391 | 0.392939794 |  | 1.03 | AMB | AMNB | Polo like kinase 4 OS=Sarcophilus harrisii OX=9305 GN=PLK4 PE=3 SV=1 |
| **G3W2S6** | 11 | 11 | 74.2 | 0.621163354 | 0.327136574 |  | 1.03 | AMNB | AMB | Aldo-keto reductase family 1 member A1 OS=Sarcophilus harrisii OX=9305 GN=AKR1A1 PE=4 SV=1 |
| **G3WBW9** | 6 | 2 | 62.6 | 0.790931478 | 0.395552206 |  | 1.03 | AMB | AMNB | Rac family small GTPase 1 OS=Sarcophilus harrisii OX=9305 GN=RAC1 PE=4 SV=1 |
| **A0A4D6UZS6** | 1 | 1 | 5.42 | 0.583378793 | 0.311589083 |  | 1.03 | AMNB | AMB | Breast cancer type 1 susceptibility protein (Fragment) OS=Micromurexia habbema OX=418664 PE=4 SV=1 |
| **G3VW99** | 6 | 3 | 39.5 | 0.993547292 | 0.458737749 |  | 1.03 | AMB | AMNB | Septin 1 OS=Sarcophilus harrisii OX=9305 GN=SEPT1 PE=3 SV=1 |
| **G3WKC1** | 3 | 1 | 18.9 | 0.909624279 | 0.435245345 |  | 1.03 | AMB | AMNB | ATP binding cassette subfamily B member 6 (Langereis blood group) OS=Sarcophilus harrisii OX=9305 GN=ABCB6 PE=4 SV=1 |
| **G3W4B5** | 4 | 4 | 26.7 | 0.486590126 | 0.272501862 |  | 1.03 | AMNB | AMB | Pyrophosphatase (inorganic) 1 OS=Sarcophilus harrisii OX=9305 GN=PPA1 PE=4 SV=1 |
| **G3WYX3** | 2 | 1 | 12.9 | 0.94188554 | 0.445344075 |  | 1.03 | AMNB | AMB | WASP homolog associated with actin_ golgi membranes and microtubules OS=Sarcophilus harrisii OX=9305 GN=WHAMM PE=4 SV=1 |
| **G3W3Y2** | 20 | 6 | 216 | 0.886005967 | 0.426285234 |  | 1.02 | AMB | AMNB | WD_REPEATS_REGION domain-containing protein OS=Sarcophilus harrisii OX=9305 GN=GNB2 PE=4 SV=1 |
| **G3VVJ3** | 14 | 8 | 89.8 | 0.755541233 | 0.380993218 |  | 1.02 | AMNB | AMB | Non-specific serine/threonine protein kinase OS=Sarcophilus harrisii OX=9305 GN=PAK1 PE=4 SV=1 |
| **G3VDI1** | 8 | 7 | 78.2 | 0.392146424 | 0.228553516 |  | 1.02 | AMNB | AMB | Isocitrate dehydrogenase [NAD] subunit_ mitochondrial OS=Sarcophilus harrisii OX=9305 GN=IDH3G PE=3 SV=1 |
| **G3VFC2** | 8 | 1 | 51.3 | 0.552877366 | 0.297829058 |  | 1.02 | AMB | AMNB | Pribosyltran_N domain-containing protein OS=Sarcophilus harrisii OX=9305 GN=LOC100916906 PE=4 SV=1 |
| **G3WEY5** | 12 | 4 | 101 | 0.886298584 | 0.426285234 |  | 1.02 | AMB | AMNB | Aldedh domain-containing protein OS=Sarcophilus harrisii OX=9305 PE=3 SV=1 |
| **G3VWH9** | 3 | 2 | 18.8 | 0.921476084 | 0.438358841 |  | 1.02 | AMB | AMNB | Septin-type G domain-containing protein OS=Sarcophilus harrisii OX=9305 GN=SEPT9 PE=3 SV=1 |
| **G3VP69** | 53 | 15 | 518 | 0.563512175 | 0.302523265 |  | 1.02 | AMB | AMNB | Uncharacterized protein OS=Sarcophilus harrisii OX=9305 GN=ACTG2 PE=3 SV=1 |
| **G3WCA7** | 4 | 3 | 24.9 | 0.693633964 | 0.357318553 |  | 1.02 | AMB | AMNB | Signal induced proliferation associated 1 like 2 OS=Sarcophilus harrisii OX=9305 GN=SIPA1L2 PE=4 SV=1 |
| **G3WSN4** | 1 | 1 | 7.87 | 0.563730891 | 0.302523265 |  | 1.02 | AMB | AMNB | ANK_REP_REGION domain-containing protein OS=Sarcophilus harrisii OX=9305 GN=MTPN PE=4 SV=1 |
| **G3VX42** | 23 | 14 | 214 | 0.768960112 | 0.386959094 |  | 1.02 | AMB | AMNB | IF rod domain-containing protein OS=Sarcophilus harrisii OX=9305 GN=NEFM PE=3 SV=1 |
| **G3VUT5** | 17 | 15 | 126 | 0.670057169 | 0.347387881 |  | 1.02 | AMNB | AMB | Succinate-semialdehyde dehydrogenase OS=Sarcophilus harrisii OX=9305 GN=ALDH5A1 PE=3 SV=1 |
| **G3VIS0** | 2 | 2 | 9.63 | 0.795855954 | 0.397312397 |  | 1.02 | AMNB | AMB | Proteasome subunit beta OS=Sarcophilus harrisii OX=9305 GN=PSMB6 PE=3 SV=1 |
| **G3WU71** | 13 | 9 | 98.3 | 0.925608451 | 0.439042172 |  | 1.02 | AMB | AMNB | Uncharacterized protein OS=Sarcophilus harrisii OX=9305 PE=4 SV=1 |
| **G3VDP1** | 5 | 2 | 44.7 | 0.810296029 | 0.402390337 |  | 1.02 | AMB | AMNB | Uncharacterized protein OS=Sarcophilus harrisii OX=9305 PE=4 SV=1 |
| **G3W652** | 22 | 19 | 252 | 0.806983475 | 0.40150284 |  | 1.02 | AMB | AMNB | Alpha-carbonic anhydrase domain-containing protein OS=Sarcophilus harrisii OX=9305 GN=CA3 PE=3 SV=1 |
| **G3VIW9** | 13 | 4 | 170 | 0.738504349 | 0.375643455 |  | 1.02 | AMNB | AMB | Histone H2B OS=Sarcophilus harrisii OX=9305 GN=LOC100913958 PE=3 SV=1 |
| **G3W0J1** | 31 | 29 | 315 | 0.869115488 | 0.422330129 |  | 1.02 | AMB | AMNB | 2'_3'-cyclic nucleotide 3' phosphodiesterase OS=Sarcophilus harrisii OX=9305 GN=CNP PE=4 SV=1 |
| **G3X0Z3** | 3 | 1 | 17 | 0.914130528 | 0.435964453 |  | 1.02 | AMB | AMNB | Stathmin OS=Sarcophilus harrisii OX=9305 GN=STMN2 PE=3 SV=1 |
| **G3W520** | 2 | 1 | 14.6 | 0.843439782 | 0.413466094 |  | 1.02 | AMNB | AMB | NCKAP5 domain-containing protein OS=Sarcophilus harrisii OX=9305 GN=NCKAP5 PE=4 SV=1 |
| **G3WR94** | 3 | 3 | 19.8 | 0.741440454 | 0.376122199 |  | 1.02 | AMNB | AMB | Calpain 2 OS=Sarcophilus harrisii OX=9305 GN=CAPN2 PE=3 SV=1 |
| **G3VMD8** | 3 | 2 | 22.8 | 0.782773104 | 0.392513277 |  | 1.02 | AMNB | AMB | ADF-H domain-containing protein OS=Sarcophilus harrisii OX=9305 GN=COTL1 PE=4 SV=1 |
| **G3VT07** | 14 | 8 | 110 | 0.8808997 | 0.425497608 |  | 1.02 | AMB | AMNB | Cytochrome c oxidase subunit 4I1 OS=Sarcophilus harrisii OX=9305 GN=COX4I1 PE=4 SV=1 |
| **G3VU65** | 5 | 1 | 46.3 | 0.877726241 | 0.424632933 |  | 1.02 | AMB | AMNB | Tropomyosin 4 OS=Sarcophilus harrisii OX=9305 GN=TPM4 PE=3 SV=1 |
| **G3W6V5** | 3 | 1 | 30.3 | 0.745637418 | 0.377573997 |  | 1.01 | AMB | AMNB | Uncharacterized protein OS=Sarcophilus harrisii OX=9305 GN=LOC100931131 PE=3 SV=1 |
| **G3WSH0** | 9 | 8 | 69.4 | 0.7950968 | 0.397284055 |  | 1.01 | AMB | AMNB | Peroxiredoxin 2 OS=Sarcophilus harrisii OX=9305 GN=PRDX2 PE=4 SV=1 |
| **G3X3J0** | 10 | 2 | 68 | 0.821496956 | 0.406234516 |  | 1.01 | AMB | AMNB | Uncharacterized protein OS=Sarcophilus harrisii OX=9305 GN=ACTR1A PE=3 SV=1 |
| **G3WVH2** | 7 | 7 | 68.8 | 0.752093291 | 0.38016242 |  | 1.01 | AMNB | AMB | F-actin-capping protein subunit alpha OS=Sarcophilus harrisii OX=9305 GN=CAPZA2 PE=3 SV=1 |
| **G3VQV7** | 32 | 29 | 268 | 0.8833173 | 0.425902273 |  | 1.01 | AMB | AMNB | Histone H4 OS=Sarcophilus harrisii OX=9305 GN=LOC111720951 PE=3 SV=1 |
| **G3VHZ4** | 1 | 1 | 6.14 | 0.912991999 | 0.435788913 |  | 1.01 | AMB | AMNB | Hydroxysteroid 17-beta dehydrogenase 12 OS=Sarcophilus harrisii OX=9305 GN=HSD17B12 PE=3 SV=1 |
| **G3X242** | 23 | 11 | 248 | 0.811798147 | 0.402782655 |  | 1.01 | AMNB | AMB | Elongation factor 1-alpha OS=Sarcophilus harrisii OX=9305 GN=EEF1A2 PE=3 SV=1 |
| **G3W048** | 6 | 5 | 35 | 0.782000131 | 0.392473615 |  | 1.01 | AMB | AMNB | Uncharacterized protein OS=Sarcophilus harrisii OX=9305 PE=3 SV=1 |
| **G3WF17** | 13 | 6 | 74.2 | 0.817068929 | 0.404950518 |  | 1.01 | AMNB | AMB | Uncharacterized protein OS=Sarcophilus harrisii OX=9305 PE=4 SV=1 |
| **M1QZR7** | 1 | 1 | 6.77 | 0.862759279 | 0.420324761 |  | 1.01 | AMNB | AMB | Coronin 1a-like protein (Fragment) OS=Dasyurus geoffroii OX=63143 GN=CORO1A PE=4 SV=1 |
| **G3VBG3** | 1 | 1 | 4.96 | 0.741310557 | 0.376122199 |  | 1.01 | AMNB | AMB | Uncharacterized protein OS=Sarcophilus harrisii OX=9305 PE=4 SV=1 |
| **G3VT38** | 47 | 24 | 486 | 0.722571792 | 0.368533535 |  | 1.01 | AMNB | AMB | Uncharacterized protein OS=Sarcophilus harrisii OX=9305 GN=LOC100924827 PE=3 SV=1 |
| **G3VK08** | 11 | 6 | 62.3 | 0.433412608 | 0.246876555 |  | 1.01 | AMB | AMNB | Uncharacterized protein OS=Sarcophilus harrisii OX=9305 GN=DENND4C PE=4 SV=1 |
| **G3WY52** | 11 | 5 | 92.3 | 0.755757639 | 0.380993218 |  | 1.01 | AMB | AMNB | PIPK domain-containing protein OS=Sarcophilus harrisii OX=9305 GN=CWC25 PE=4 SV=1 |
| **G3X1D1** | 13 | 12 | 77.1 | 0.925486185 | 0.439042172 |  | 1.01 | AMNB | AMB | Uncharacterized protein OS=Sarcophilus harrisii OX=9305 PE=4 SV=1 |
| **G3W7B2** | 5 | 2 | 29.7 | 0.995207342 | 0.458737749 |  | 1.01 | AMB | AMNB | Uncharacterized protein OS=Sarcophilus harrisii OX=9305 GN=GNAQ PE=4 SV=1 |
| **G3WVU3** | 4 | 4 | 23.6 | 0.956013476 | 0.450619856 |  | 1.01 | AMB | AMNB | NADH:ubiquinone oxidoreductase core subunit S2 OS=Sarcophilus harrisii OX=9305 GN=NDUFS2 PE=3 SV=1 |
| **G3VJ06** | 9 | 2 | 104 | 0.942458581 | 0.445344075 |  | 1.01 | AMB | AMNB | IF rod domain-containing protein OS=Sarcophilus harrisii OX=9305 GN=KRT8 PE=3 SV=1 |
| **G3VVU9** | 6 | 6 | 33.9 | 0.948318832 | 0.447739194 |  | 1.01 | AMB | AMNB | Reticulon OS=Sarcophilus harrisii OX=9305 GN=RTN4 PE=4 SV=1 |
| **G3VSE1** | 3 | 1 | 17.7 | 0.844295217 | 0.413466094 |  | 1.01 | AMB | AMNB | Chromosome 20 open reading frame 194 OS=Sarcophilus harrisii OX=9305 GN=C20orf194 PE=4 SV=1 |
| **G3VZ83** | 12 | 9 | 95.5 | 0.865706979 | 0.42131147 |  | 1.01 | AMB | AMNB | Dihydropyrimidinase like 4 OS=Sarcophilus harrisii OX=9305 GN=DPYSL4 PE=4 SV=1 |
| **G3WS35** | 6 | 3 | 37.6 | 0.846994199 | 0.414070826 |  | 1.01 | AMNB | AMB | Proteasome subunit alpha type OS=Sarcophilus harrisii OX=9305 GN=PSMA7 PE=3 SV=1 |
| **G3W0M3** | 8 | 7 | 70.4 | 0.807942462 | 0.40157413 |  | 1.01 | AMNB | AMB | UBIQUITIN_CONJUGAT_2 domain-containing protein OS=Sarcophilus harrisii OX=9305 GN=UBE2N PE=3 SV=1 |
| **G3VU48** | 9 | 7 | 86.3 | 0.892955435 | 0.428917952 |  | 1.01 | AMNB | AMB | HIT domain-containing protein OS=Sarcophilus harrisii OX=9305 GN=HINT1 PE=4 SV=1 |
| **G3X0X8** | 2 | 1 | 14 | 0.857695124 | 0.418578639 |  | 1.01 | AMNB | AMB | RAB30_ member RAS oncogene family OS=Sarcophilus harrisii OX=9305 GN=RAB30 PE=4 SV=1 |
| **G3VHA2** | 2 | 1 | 18.1 | 0.86209717 | 0.420324761 |  | 1.01 | AMNB | AMB | Acyl-CoA thioesterase 13 OS=Sarcophilus harrisii OX=9305 GN=ACOT13 PE=4 SV=1 |
| **G3WLE5** | 4 | 4 | 30.9 | 0.878358845 | 0.424632933 |  | 1.01 | AMNB | AMB | WHEP-TRS domain-containing protein OS=Sarcophilus harrisii OX=9305 GN=WARS PE=3 SV=1 |
| **G3VFI0** | 2 | 1 | 13.3 | 0.967922924 | 0.453211997 |  | 1.01 | AMB | AMNB | Uncharacterized protein OS=Sarcophilus harrisii OX=9305 PE=4 SV=1 |
| **G3W2Z2** | 19 | 10 | 174 | 0.75050857 | 0.379700709 |  | 1.01 | AMNB | AMB | Pyruvate dehydrogenase E1 component subunit beta OS=Sarcophilus harrisii OX=9305 PE=4 SV=1 |
| **G3WVC0** | 6 | 1 | 59.4 | 0.912688686 | 0.435788913 |  | 1.01 | AMB | AMNB | Uncharacterized protein OS=Sarcophilus harrisii OX=9305 GN=NCALD PE=4 SV=1 |
| **G3W004** | 11 | 7 | 72.6 | 0.875823131 | 0.42449552 |  | 1.01 | AMNB | AMB | Uncharacterized protein OS=Sarcophilus harrisii OX=9305 PE=4 SV=1 |
| **Q0QEU8** | 28 | 4 | 340 | 0.845282273 | 0.413591384 |  | 1.01 | AMNB | AMB | Glyceraldehyde-3-phosphate dehydrogenase (Fragment) OS=Sminthopsis douglasi OX=90758 GN=GAPDH PE=2 SV=1 |
| **G3WQA5** | 30 | 2 | 434 | 0.843189059 | 0.413466094 |  | 1.01 | AMNB | AMB | Glyceraldehyde-3-phosphate dehydrogenase OS=Sarcophilus harrisii OX=9305 GN=GAPDH PE=3 SV=1 |
| **G3WUJ6** | 15 | 8 | 88.6 | 0.972973765 | 0.454122607 |  | 1.01 | AMB | AMNB | Rab GDP dissociation inhibitor OS=Sarcophilus harrisii OX=9305 PE=3 SV=1 |
| **G3W0F8** | 3 | 2 | 17.6 | 0.92747134 | 0.43936325 |  | 1.01 | AMB | AMNB | Uncharacterized protein OS=Sarcophilus harrisii OX=9305 PE=4 SV=1 |
| **G3VHW7** | 5 | 5 | 50.9 | 0.964799394 | 0.45308864 |  | 1.01 | AMB | AMNB | Clathrin light chain OS=Sarcophilus harrisii OX=9305 GN=CLTB PE=3 SV=1 |
| **G3WXI0** | 13 | 4 | 96.7 | 0.995488252 | 0.458737749 |  | 1.01 | AMB | AMNB | Eukaryotic translation initiation factor 4A2 OS=Sarcophilus harrisii OX=9305 GN=EIF4A2 PE=3 SV=1 |
| **G3WHP0** | 5 | 1 | 41.1 | 0.824376099 | 0.406881862 |  | 1 | AMNB | AMB | Uncharacterized protein OS=Sarcophilus harrisii OX=9305 GN=RAB39A PE=4 SV=1 |
| **G3VQM5** | 1 | 1 | 6.33 | 0.965256344 | 0.45308864 |  | 1 | AMNB | AMB | Aha1_N domain-containing protein OS=Sarcophilus harrisii OX=9305 GN=AHSA1 PE=4 SV=1 |
| **G3WQH5** | 44 | 39 | 540 | 0.967056309 | 0.453181371 |  | 1 | AMB | AMNB | Uncharacterized protein OS=Sarcophilus harrisii OX=9305 GN=ALB PE=4 SV=1 |
| **G3VZN9** | 1 | 1 | 5.55 | 0.843808859 | 0.413466094 |  | 1 | AMNB | AMB | Uncharacterized protein OS=Sarcophilus harrisii OX=9305 PE=4 SV=1 |
| **G3X0B8** | 20 | 18 | 146 | 0.878187477 | 0.424632933 |  | 1 | AMB | AMNB | Uncharacterized protein OS=Sarcophilus harrisii OX=9305 GN=GSN PE=4 SV=1 |
| **G3WE03** | 15 | 13 | 111 | 0.989518885 | 0.458737749 |  | 1 | AMNB | AMB | Rap1 GTPase-GDP dissociation stimulator 1 OS=Sarcophilus harrisii OX=9305 GN=RAP1GDS1 PE=4 SV=1 |
| **G3W4Y6** | 6 | 4 | 45.4 | 0.951575597 | 0.448902133 |  | 1 | AMNB | AMB | Cytochrome c oxidase subunit OS=Sarcophilus harrisii OX=9305 GN=COX6B1 PE=3 SV=1 |
| **G3WUZ9** | 4 | 2 | 18.1 | 0.982445606 | 0.456985579 |  | 1 | AMB | AMNB | Leucine aminopeptidase 3 OS=Sarcophilus harrisii OX=9305 GN=LAP3 PE=3 SV=1 |
| **G3WNV4** | 13 | 11 | 111 | 0.981518791 | 0.456985579 |  | 1 | AMB | AMNB | Thioredoxin domain-containing protein OS=Sarcophilus harrisii OX=9305 GN=PRDX3 PE=4 SV=1 |
| **G3WKT2** | 2 | 2 | 8.36 | 0.822346317 | 0.406234516 |  | 1 | AMB | AMNB | Kinesin motor domain-containing protein OS=Sarcophilus harrisii OX=9305 GN=KIF20B PE=3 SV=1 |
| **G3WV76** | 19 | 15 | 197 | 0.971611498 | 0.454122607 |  | 1 | AMB | AMNB | Ubiquitin carboxyl-terminal hydrolase OS=Sarcophilus harrisii OX=9305 GN=UCHL1 PE=3 SV=1 |
| **G3VJA2** | 6 | 3 | 55.6 | 0.957169877 | 0.450789271 |  | 1 | AMB | AMNB | Glycoprotein M6B OS=Sarcophilus harrisii OX=9305 GN=GPM6B PE=4 SV=1 |
| **G3WTR1** | 9 | 6 | 61.8 | 0.966457061 | 0.453181371 |  | 1 | AMB | AMNB | Phosphagen kinase N-terminal domain-containing protein OS=Sarcophilus harrisii OX=9305 PE=3 SV=1 |
| **G3X2J9** | 4 | 3 | 20.4 | 0.984449215 | 0.457541293 |  | 1 | AMB | AMNB | MDM2 binding protein OS=Sarcophilus harrisii OX=9305 GN=MTBP PE=4 SV=1 |
| **G3WGJ0** | 2 | 1 | 12.7 | 0.992526285 | 0.458737749 |  | 1 | AMNB | AMB | Ubiquitin carboxyl-terminal hydrolase OS=Sarcophilus harrisii OX=9305 GN=USP20 PE=3 SV=1 |
| **G3WYQ4** | 10 | 2 | 109 | 0.994743808 | 0.458737749 |  | 1 | AMB | AMNB | Uncharacterized protein OS=Sarcophilus harrisii OX=9305 GN=ARF4 PE=3 SV=1 |
| **G3WQM0** | 10 | 1 | 108 | 0.994743805 | 0.458737749 |  | 1 | AMB | AMNB | Uncharacterized protein OS=Sarcophilus harrisii OX=9305 GN=ARF5 PE=3 SV=1 |
| **G3X0F1** | 1 | 1 | 5.74 | 0.969692404 | 0.453664973 |  | 1 | AMB | AMNB | Cerebellin 1 precursor OS=Sarcophilus harrisii OX=9305 GN=CBLN1 PE=4 SV=1 |
| **G3VUF1** | 5 | 2 | 27.7 | 0.925071471 | 0.439042172 |  | 1 | AMNB | AMB | Hydroxysteroid 17-beta dehydrogenase 10 OS=Sarcophilus harrisii OX=9305 GN=HSD17B10 PE=3 SV=1 |
| **G3WHH2** | 62 | 16 | 895 | 0.973079192 | 0.454122607 |  | 1 | AMB | AMNB | Uncharacterized protein OS=Sarcophilus harrisii OX=9305 GN=ACTB PE=3 SV=1 |
